# Supplementary material for: Efficient synthesis of the C7-C20 subunit of amphidinolides C and F
Source: Royal Society of Chemistry journal article supplement (doi:10.1039/b916744g), 2009-01-01
Supplement: b916744g_b.pdf [file b916744g_b.pdf]

# **Efficient Synthesis of the C<sub>7</sub>-C<sub>20</sub> Subunit of Amphidinolides C and F**

**Subham Mahapatra and Rich G. Carter\***

*Department of Chemistry, Oregon State University, 153 Gilbert Hall,  
Corvallis, OR 97331.*

---

**Electronic Supplementary Information: Spectral Data**

---

# Efficient Synthesis of the C7-C20 Subunit of Amphidinolides C and F

## Table of Contents

| Compound # | Page Number |
|------------|-------------|
| <b>7</b>   | S3          |
| <b>13</b>  | S5          |
| <b>30</b>  | S7          |
| <b>15</b>  | S9          |
| <b>31</b>  | S11         |
| <b>16</b>  | S13         |
| <b>32</b>  | S15         |
| <b>17</b>  | S17         |
| <b>5</b>   | S19         |
| <b>20</b>  | S21         |
| <b>33</b>  | S23         |
| <b>21</b>  | S25         |
| <b>22</b>  | S27         |
| <b>23</b>  | S29         |
| <b>4</b>   | S31         |
| <b>24</b>  | S33         |
| <b>3</b>   | S35         |
| <b>37</b>  | S37         |
| <b>38</b>  | S39         |
| <b>39</b>  | S41         |
| <b>27</b>  | S43         |
| <b>28</b>  | S45         |
| <b>42</b>  | S47         |
| <b>44</b>  | S49         |
| <b>45</b>  | S51         |
| <b>47</b>  | S53         |

Weinreb Amide

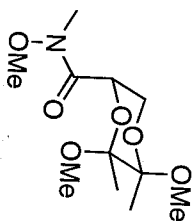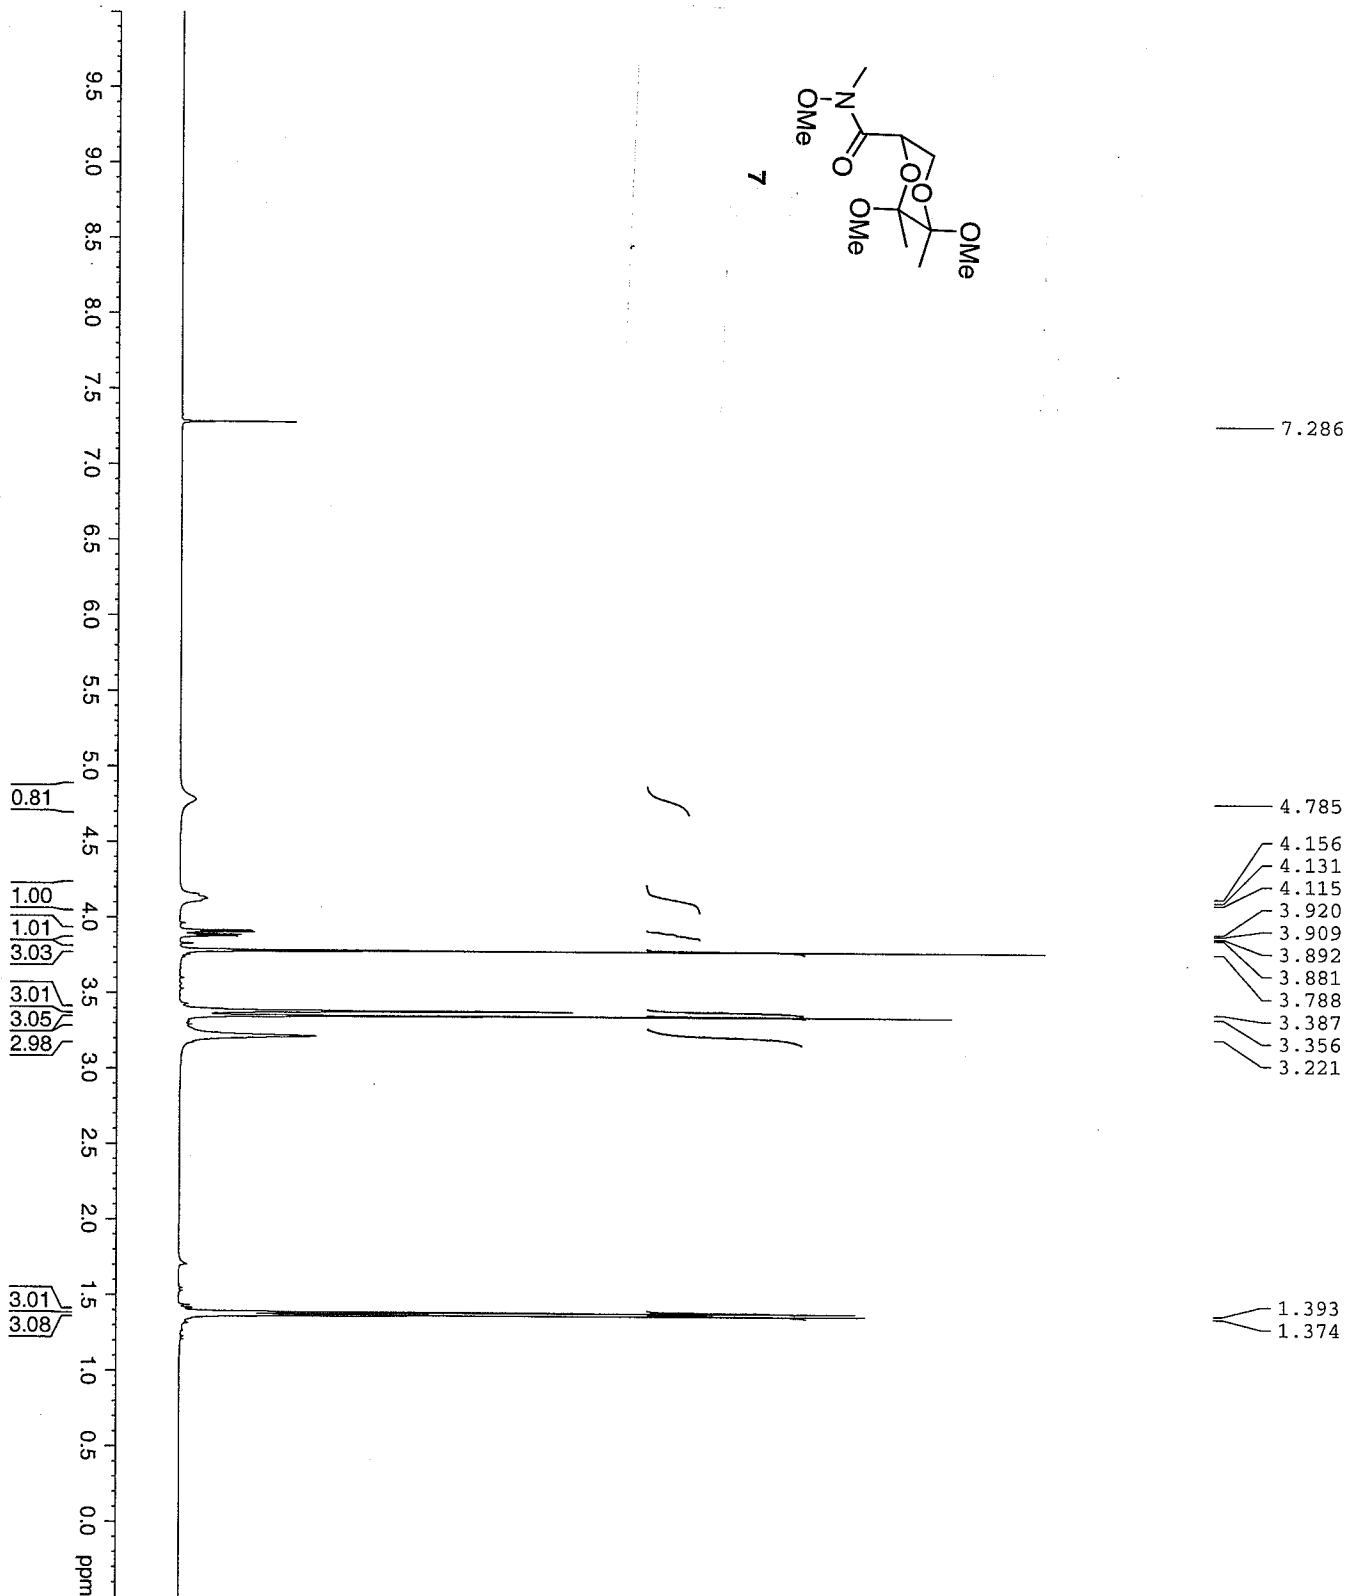

Current Data Parameters  
 Name: S08-154-Weinreb Amide  
 ExpNo: 2  
 PROCNO: 1  
 ID: 7  
 USER: subham

F2 - Acquisition Parameters  
 Date\_ 20081111  
 Time 19.55  
 INSTRUM DFX400  
 PROBHD 5 mm BBO BB-1H  
 PULPROG zg30  
 TD 32768  
 SOLVENT CDCl3  
 NS 32  
 DS 2

SWH 6410.256 Hz  
 FIDRES 0.195625 Hz  
 AQ 2.5559540 sec  
 RG 161.3  
 K0 78.000 usec  
 DM 6.00 usec  
 DE 258.0 K  
 D1 2.0000000 sec  
 TDO 1

==== CHANNEL f1 =====  
 NUC1 1H  
 P1 14.70 usec  
 PL1 0.00 dB  
 SFO1 399.9528000 MHz

F2 - Processing parameters  
 SI 32768  
 SF 399.9500000 MHz  
 WDW EM  
 SSB 0  
 LB 0.70 Hz  
 GB 0  
 PC 1.00

Weinreb amide

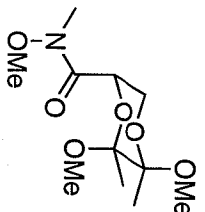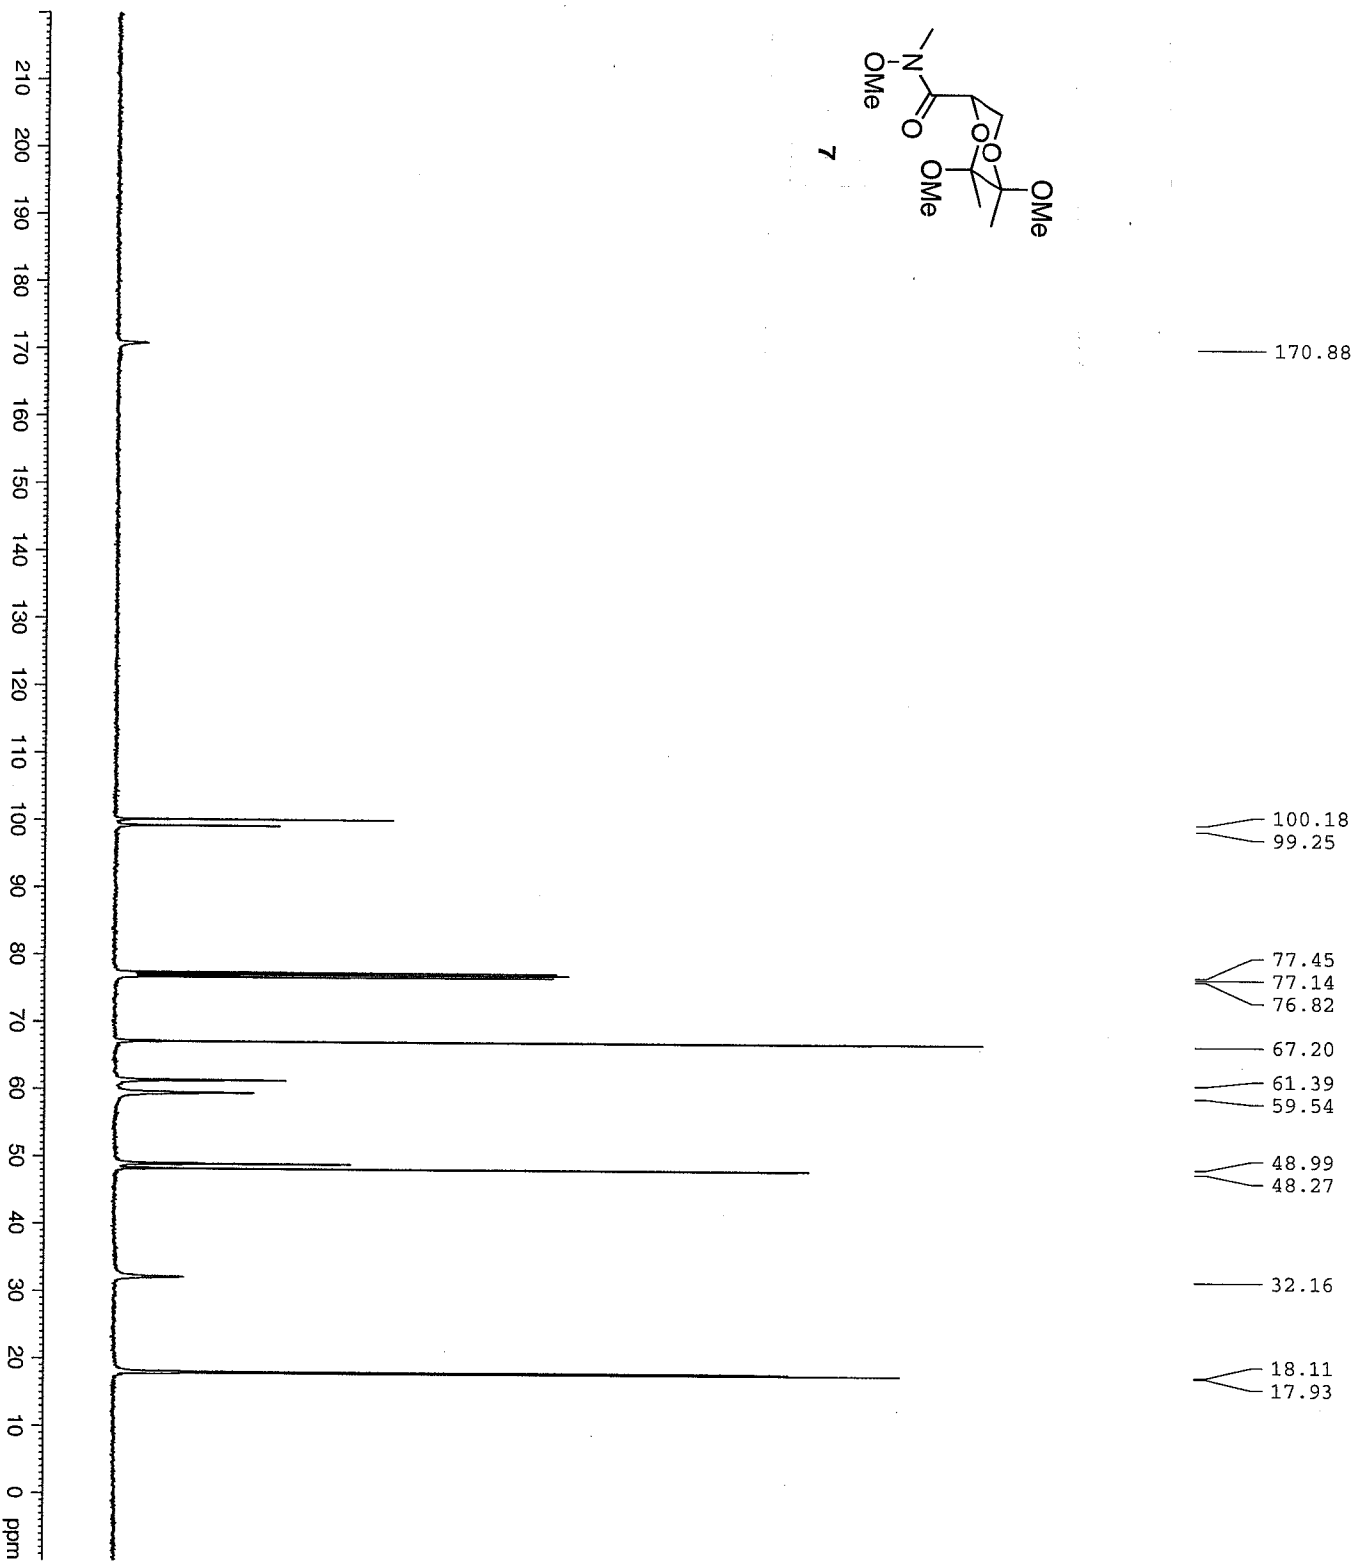

Current Data Parameters  
 Name: SMF-I-35-Weinreb amide  
 EXNO: 1  
 PROCNO: 1  
 DU: /n  
 USER: subham

F2 - Acquisition Parameters  
 Date\_: 20080909  
 Time: 17:49  
 INSTRUM: D4400  
 PROBRD: 5 mm BBO  
 PULPROG: zgpg30  
 TD: 65536  
 SOLVENT: CDCl3  
 NS: 4000  
 DS: 4  
 SWH: 25125.629 Hz  
 FIDRES: 0.383387 Hz  
 AQ: 1.3942164 sec  
 RG: 139.976  
 BA: 139.976 usec  
 DE: 6.00 usec  
 TE: 298.2 K  
 D1: 0.15000001 sec  
 d11: 0.03000000 sec  
 DELTA: 0.05000000 sec  
 TDO: 1

==== CHANNEL f1 =====  
 NUC1: 13C  
 P1: 7.80 usec  
 PL: -1.00 dB  
 SFO1: 100.5785700 MHz

==== CHANNEL f2 =====  
 CPDPRG2: waltz16  
 NUC2: 1H  
 P2: 135.00 usec  
 PL2: 1.40 dB  
 PL12: 1.40 dB  
 PL13: 17.40 dB  
 SFO2: 399.9516000 MHz

F2 - Processing parameters  
 SI: 32768  
 SF: 100.5675080 MHz  
 WDM: EM  
 SSB: 0  
 GB: 3.00 Hz  
 PC: 1.40

Epoxide

- 7.286
- 6.457
- 3.981
- 3.949
- 3.733
- 3.719
- 3.708
- 3.687
- 3.677
- 3.558
- 3.553
- 3.172
- 3.166
- 3.161
- 3.157
- 3.151
- 2.142
- 1.757
- 1.755

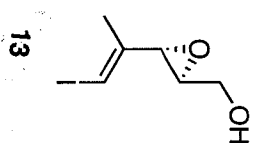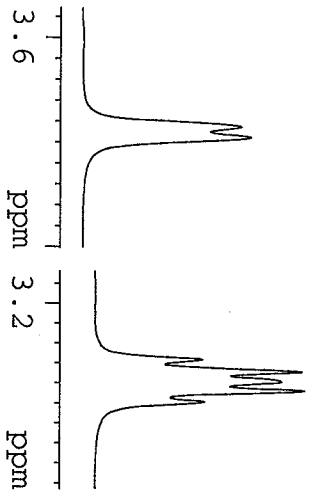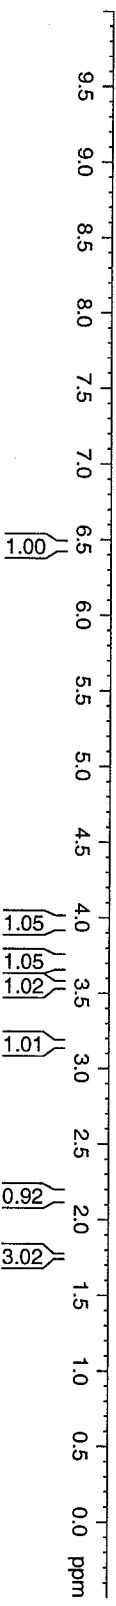

Current Data Parameters  
 NAME SUN-1153-Epoxyde  
 EXPNO 1  
 PROCNO 1  
 F2 - Acquisition Parameters  
 Date\_ 20081022  
 Time 0.42  
 INSTRUM DPX400  
 PROBHD 5 mm BBO BB-1H  
 PULPROG zg30  
 TD 32768  
 SOLVENT  
 NS 32  
 DS 2  
 SMH 6410.256 Hz  
 FIDRES 0.195625 Hz  
 AQ 2.5559540 sec  
 RG 512  
 DW 78.000 usec  
 DE 6.00 usec  
 TE 298.2 K  
 D1 2.00000000 sec  
 TD0 1  
 ===== CHANNEL f1 =====  
 NUC1 1H  
 P1 14.70 usec  
 PL 0.00 dB  
 SFO1 399.9528000 MHz  
 F2 - Processing parameters  
 SI 32768  
 SF 399.9500000 MHz  
 WDW EM  
 SSB 0  
 LBB 0  
 LB 0.70 Hz  
 GB 0  
 PC 1.00

Epoxide

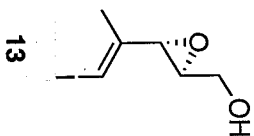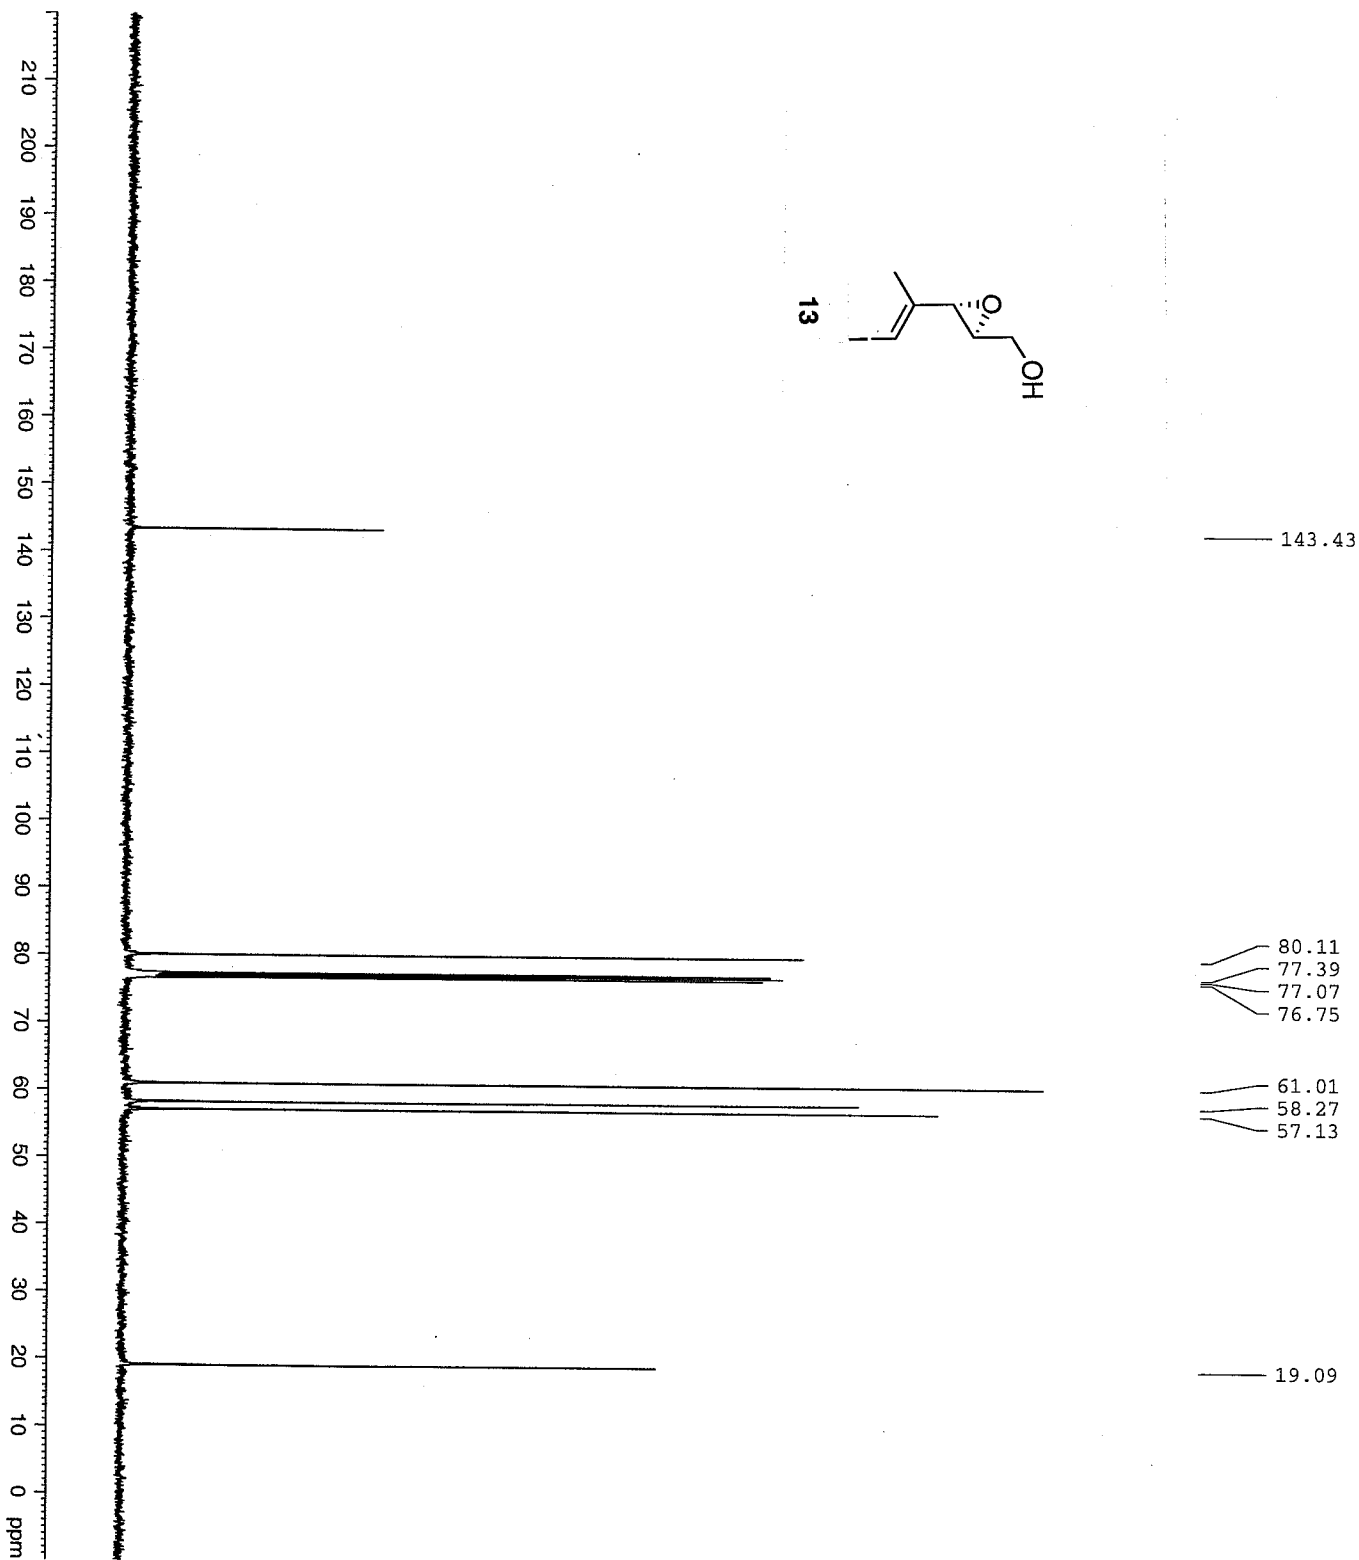

Current Data Parameters  
 NAME STM-1153-Epoxide  
 EXPNO 3  
 PROCNO 1  
 DU /n  
 USER subham

F2 - Acquisition Parameters  
 Date\_ 20081022  
 Time 1.06  
 INSTRUM DEX400  
 PROBHD 5 mm BBO BB-1H  
 PULPROG zgpg30  
 TD 65536  
 SOLVENT NS  
 NS 1880  
 DS 4  
 SMH 25125.629 Hz  
 FIDRES 0.383387 Hz  
 AQ 1.3042164 sec  
 RG 16384  
 DW 19.900 usec  
 DE 6.00 usec  
 TE 298.2 K  
 D1 0.15000001 sec  
 d11 0.03000000 sec  
 DELTA 0.05000000 sec  
 TDU 1

==== CHANNEL f1 =====  
 NUC1 13C  
 P1 7.80 usec  
 PL1 -3.00 dB  
 SFO1 100.5785700 MHz

==== CHANNEL f2 =====  
 CPDPRG2 waltz16  
 NUC2 1H  
 PCPD2 135.00 usec  
 PL2 17.40 dB  
 PL12 17.40 dB  
 PL13 17.40 dB  
 SFO2 399.9516000 MHz

F2 - Processing parameters  
 SI 32768  
 SF 100.5675080 MHz  
 WDW EM  
 SSB 0  
 LB 3.00 Hz  
 GB 0  
 PC 1.40

TBS-alcohol

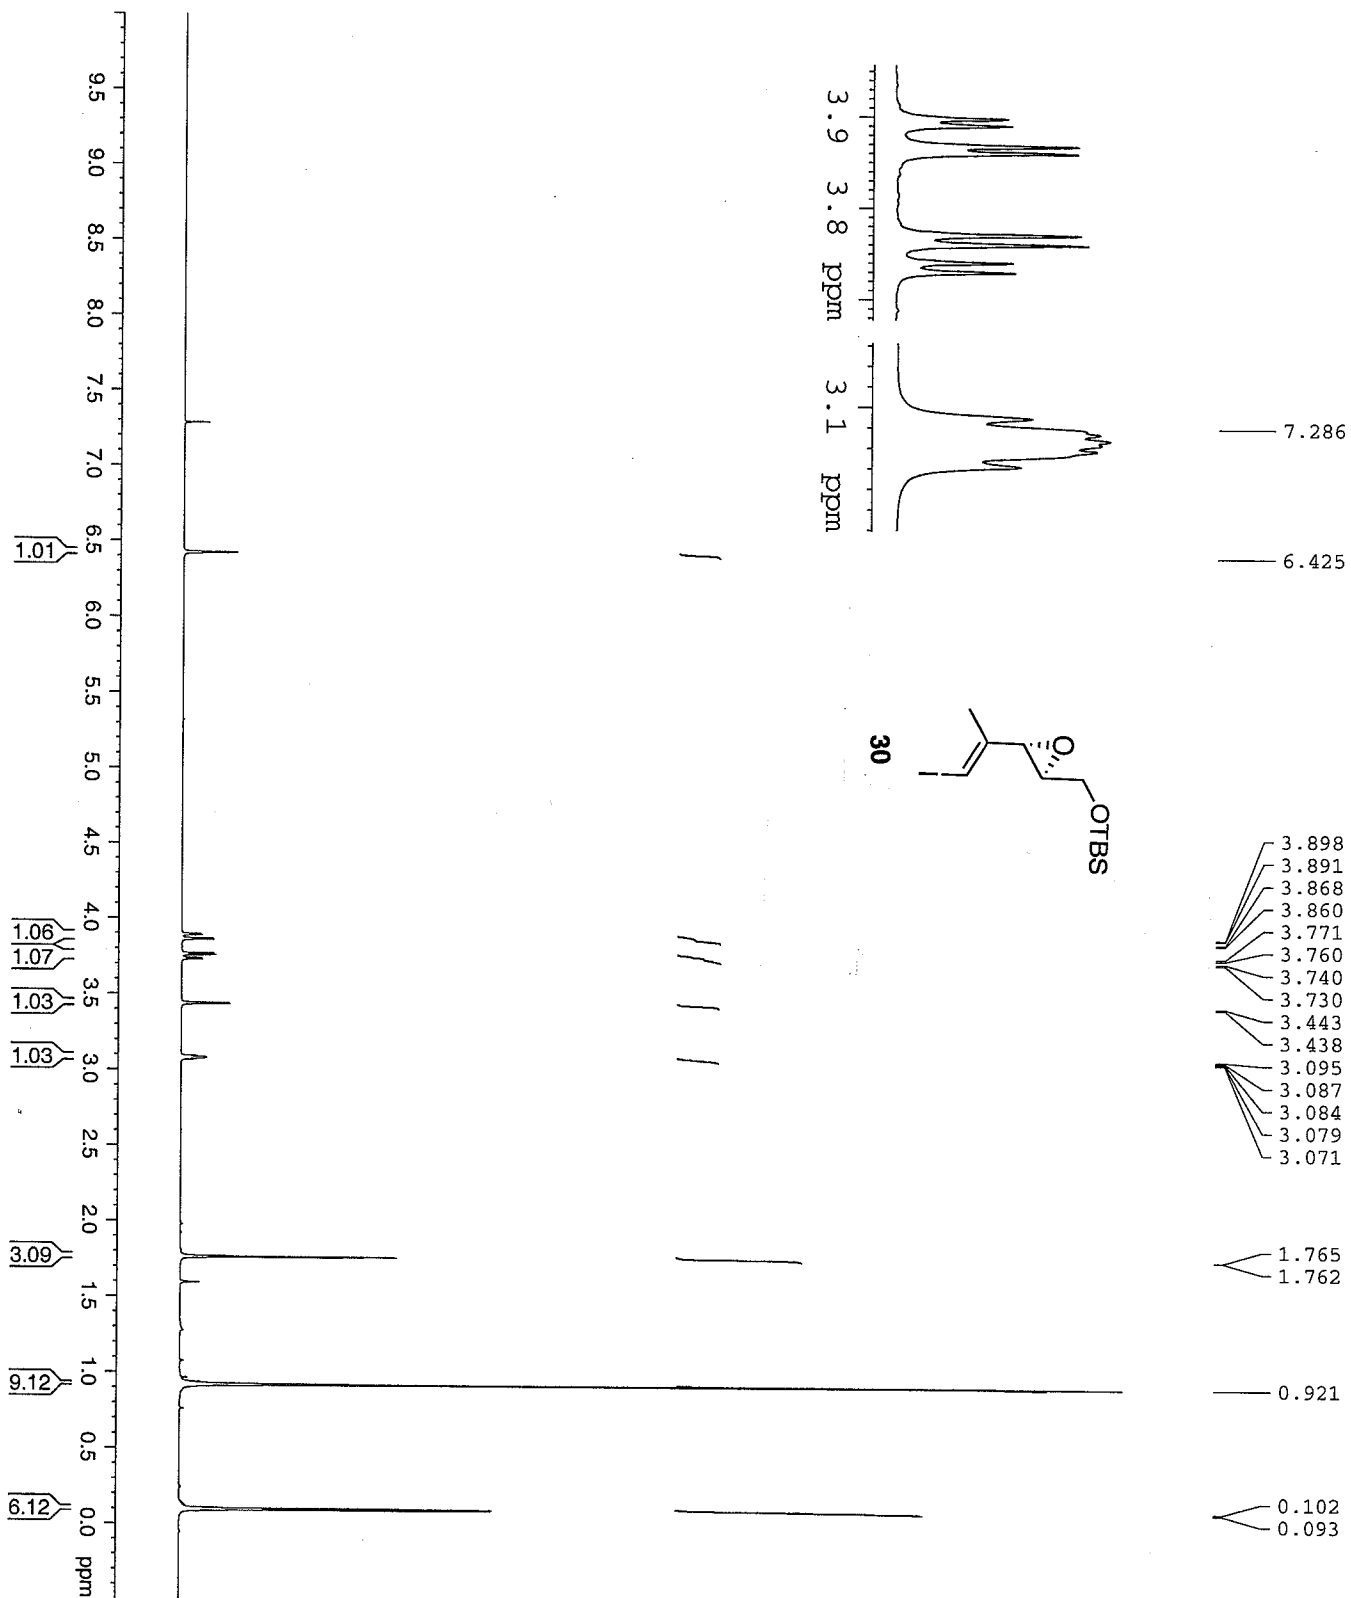

| Chemical Shift (ppm) | Integration |
|----------------------|-------------|
| 0.102                | 0.093       |
| 0.921                | 9.12        |
| 1.765                | 3.09        |
| 1.762                | 3.09        |
| 3.071                | 1.03        |
| 3.084                | 1.03        |
| 3.087                | 1.03        |
| 3.438                | 1.03        |
| 3.443                | 1.03        |
| 3.730                | 1.03        |
| 3.740                | 1.03        |
| 3.760                | 1.03        |
| 3.771                | 1.03        |
| 3.860                | 1.03        |
| 3.868                | 1.03        |
| 3.891                | 1.03        |
| 3.898                | 1.03        |

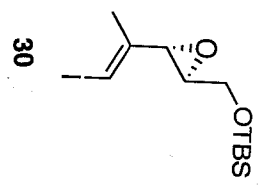

Current Data Parameters  
 Name: SDM-1153-(TBS-alcohol)  
 ExpNo: 2  
 ProcNo: 1  
 DU: /n  
 User: subham

F2 - Acquisition Parameters  
 Date\_: 20081022  
 Time: 22.53  
 Instrum: DPX400  
 Probid: 5 mm BBO BB-1H  
 PULPROG: zg30  
 TD: 32768  
 SOLVENT: CDCl3  
 NS: 32  
 DS: 2  
 SWH: 6410.256 Hz  
 FIDRES: 0.1195625 Hz  
 AQ: 2.5559540 sec  
 RG: 161.3  
 DW: 78.000 usec  
 DE: 6.00 usec  
 TE: 298.2 K  
 D1: 2.0000000 sec  
 TDO: 1

===== CHANNEL f1 =====  
 NUC1: 13C  
 P1: 14.70 usec  
 PL1: 0.70 dB  
 SFO1: 399.9528000 MHz

F2 - Processing parameters  
 SI: 32768  
 SF: 399.9500000 MHz  
 WDW: EM  
 SSB: 0  
 LB: 0 Hz  
 GB: 0  
 PC: 1.00

TBS-alcohol

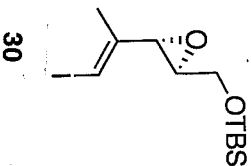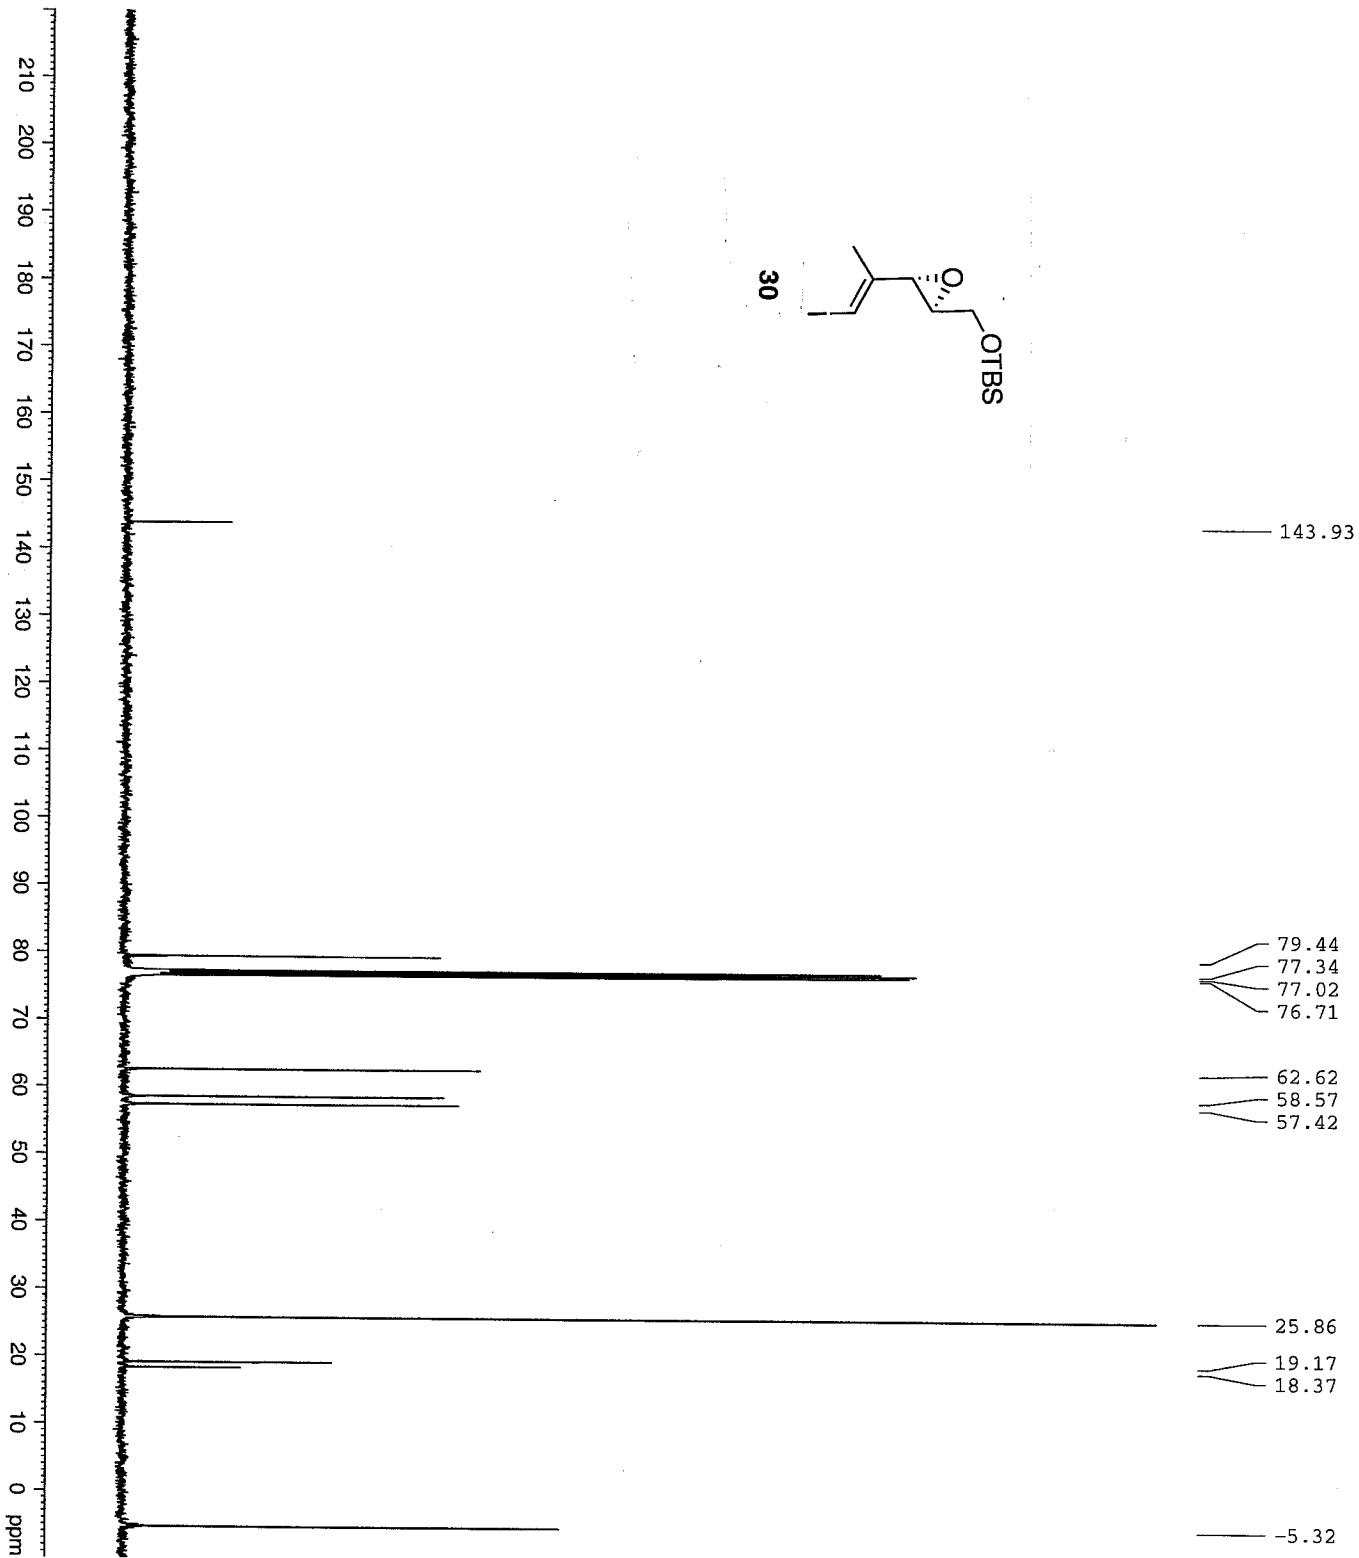

143.93

79.44  
77.34  
77.02  
76.71

62.62  
58.57  
57.42

25.86  
19.17  
18.37

5.32

```

Current Data Parameters
NAME          SWH-II53-TBS-alcohol
EXPNO         4
PROCNO        1
DU             /n
USR           subham
F2 - Acquisition Parameters
Date_         20081022
Time          23:10
INSTRUM      DPK400
PROBHD       5 mm BBO BB-1H
PULPROG      zgpg30
TD            65536
SOLVENT      2450
NS            4
DS            25125.629 Hz
SMH           0.38387 Hz
FIDRES       1.3042164 sec
AQ           16384
RG           19.900 usec
DE           6.00 usec
TE           298.2 K
D1           0.1500001 sec
d11          0.0300000 sec
DELTA        0.0500000 sec
TD0          1
===== CHANNEL f1 =====
NUC1          13C
P1            7.80 usec
PL1          -3.00 dB
SFO1         100.5785700 MHz
===== CHANNEL f2 =====
CPDPRG2      waltz16
NUC2          135.0H
P2            135.0H usec
PL2          17.40 dB
PL12         17.40 dB
PL13         17.40 dB
SFO2         399.9516000 MHz
F2 - Processing parameters
SI            32768
SF           100.5675080 MHz
WDW           EM
SSB           0
LB            3.00 Hz
GB            0
PC            1.40
  
```



# Epoxide opening

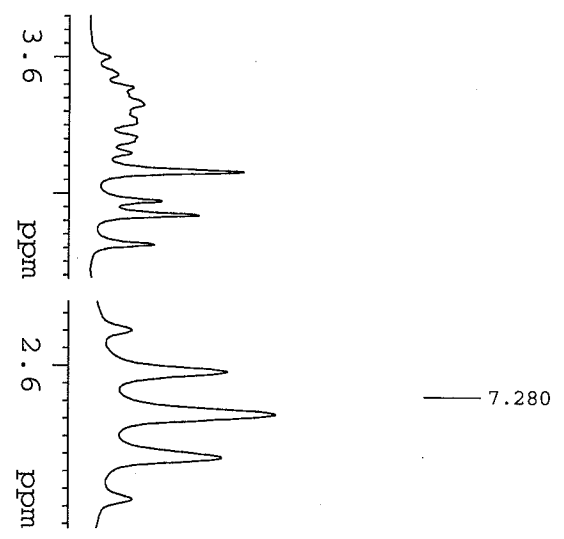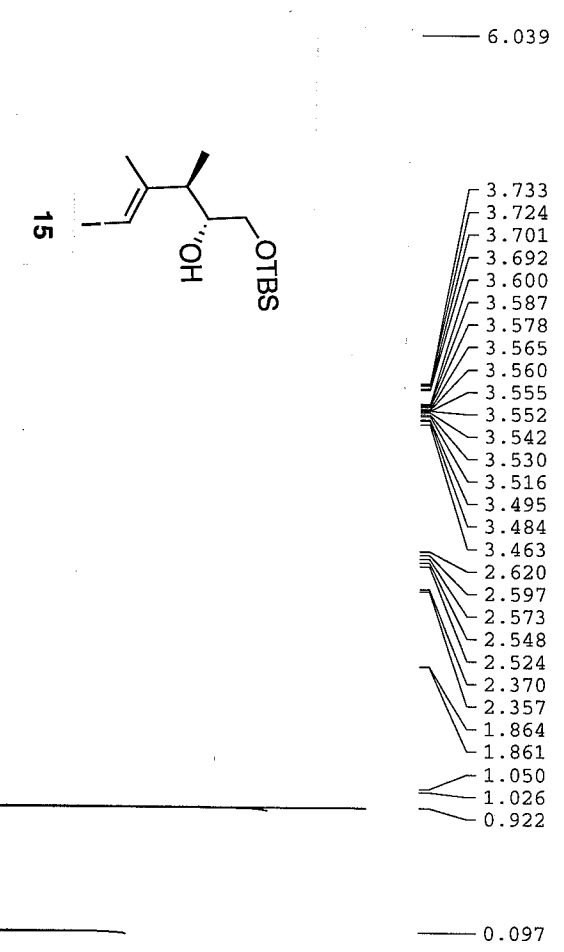

| Chemical Shift (ppm) |
|----------------------|
| 3.733                |
| 3.724                |
| 3.701                |
| 3.692                |
| 3.600                |
| 3.587                |
| 3.578                |
| 3.565                |
| 3.555                |
| 3.542                |
| 3.530                |
| 3.516                |
| 3.495                |
| 3.484                |
| 3.463                |
| 2.620                |
| 2.597                |
| 2.573                |
| 2.548                |
| 2.524                |
| 2.370                |
| 2.357                |
| 1.864                |
| 1.861                |
| 1.050                |
| 1.026                |
| 0.922                |

```

Current Data Parameters
NAME      SUW-II-56-Epoxide opening
EXRNO    3
PROCNO   1
PU       /n
USER     subhan

F2 - Acquisition Parameters
Date_    20081028
Time     22.51
INSTRUM  DEX300
PROBHD   5 mm QNP
PULPROG  zgpg30
TD       32768
SOLVENT  CDCl3
NS       32
DS       2
SWH      4789.972 Hz
FIDRES   0.146151 Hz
AQ       3.4210291 sec
RG       322.5
DE       104.400 usec
TE       298.2 K
TD0      2.00000000 sec
===== CHANNEL F1 =====
NUC1     1H
P1       9.00 usec
PL1      -3.00 dB
SFO1     300.1321093 MHz

F2 - Processing parameters
SI       32768
SF       300.1300000 MHz
WDW      EM
SSB      0
LB       0.30 Hz
GB       0
PC       1.00
  
```

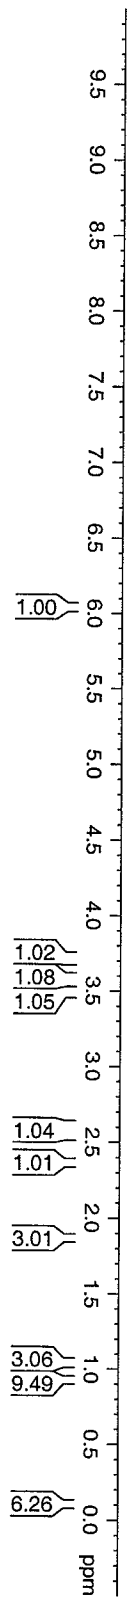

# Epoxide Opening

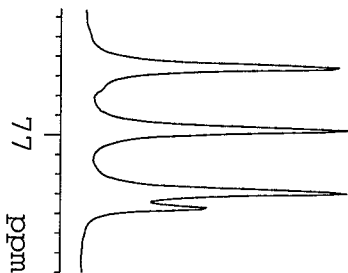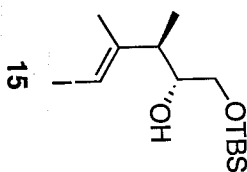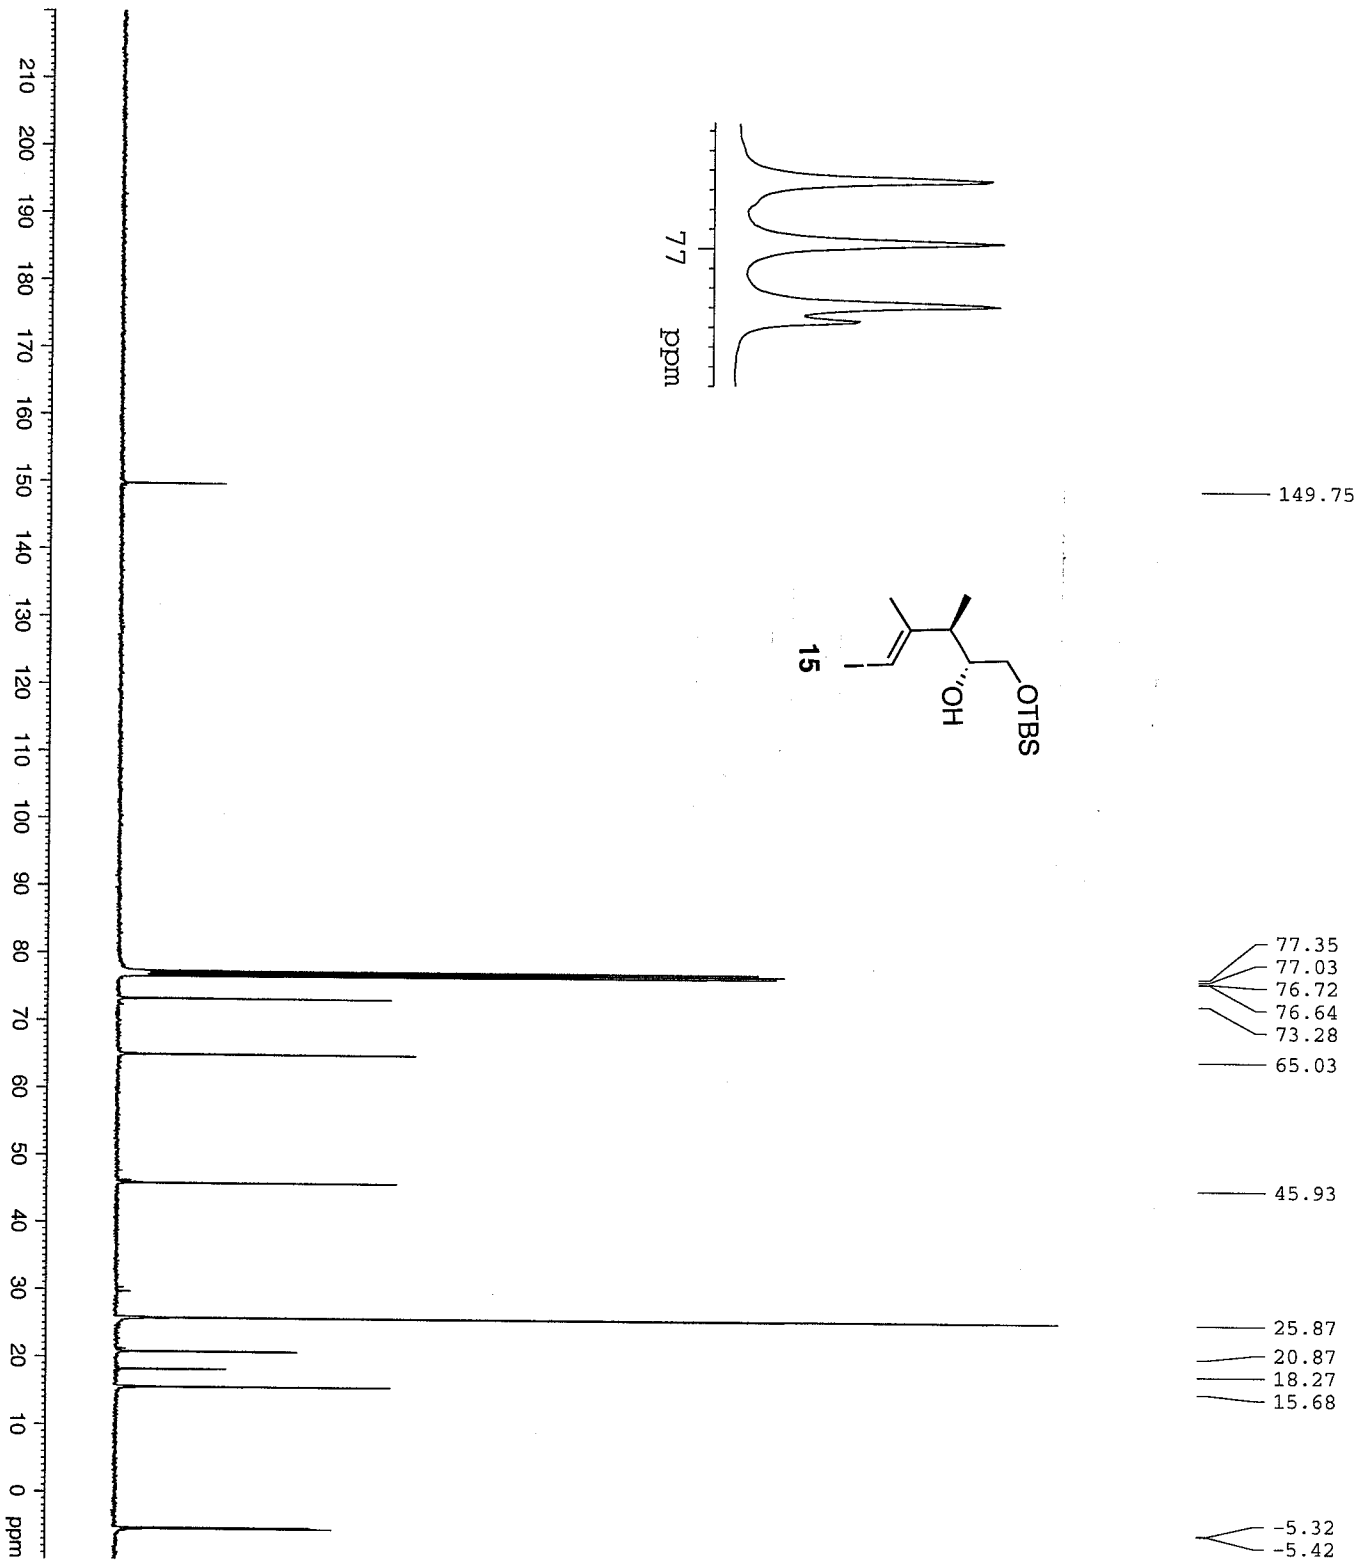

- 149.75
- 77.35
- 77.03
- 76.72
- 76.64
- 73.28
- 65.03
- 45.93
- 25.87
- 20.87
- 18.27
- 15.68
- 5.32
- 5.42

```

Current Data Parameters
=====
EXPNO 4
PROCNO 1
DU 1
USER /n
SUBNAM subnam
F2 - Acquisition Parameters
Date_ 20090404
Time 23:44
INSTRUM DRX400
PROBHD 5 mm BBO BB-1H
PULPROG zgpg30
TD 65536
SFO1 500
SFO2 399.9516000 MHz
DS 4
SWH 25125.625 Hz
FIDRES 0.383387 Hz
AQ 1.3042164 sec
RG 6280
DE 15.200 usec
TE 298.2 K
D1 0.15000001 sec
d11 0.03000000 sec
DETRN 0.05000000 sec
L20 1

===== CHANNEL f1 =====
NUC1 13C
P1 7.80 usec
PL1 -3.00 dB
SFO1 100.5785700 MHz

===== CHANNEL f2 =====
CPDPRG2 waltz16
NUC2 1H
PCPD2 135.00 usec
PL2 17.40 dB
PL12 17.40 dB
PL13 17.40 dB
SFO2 399.9516000 MHz

F2 - Processing parameters
SI 32768
SF 100.5675000 MHz
WDW EM
SSB 0
LB 3.00 Hz
GB 0
PC 1.40
  
```

di-TBS ether

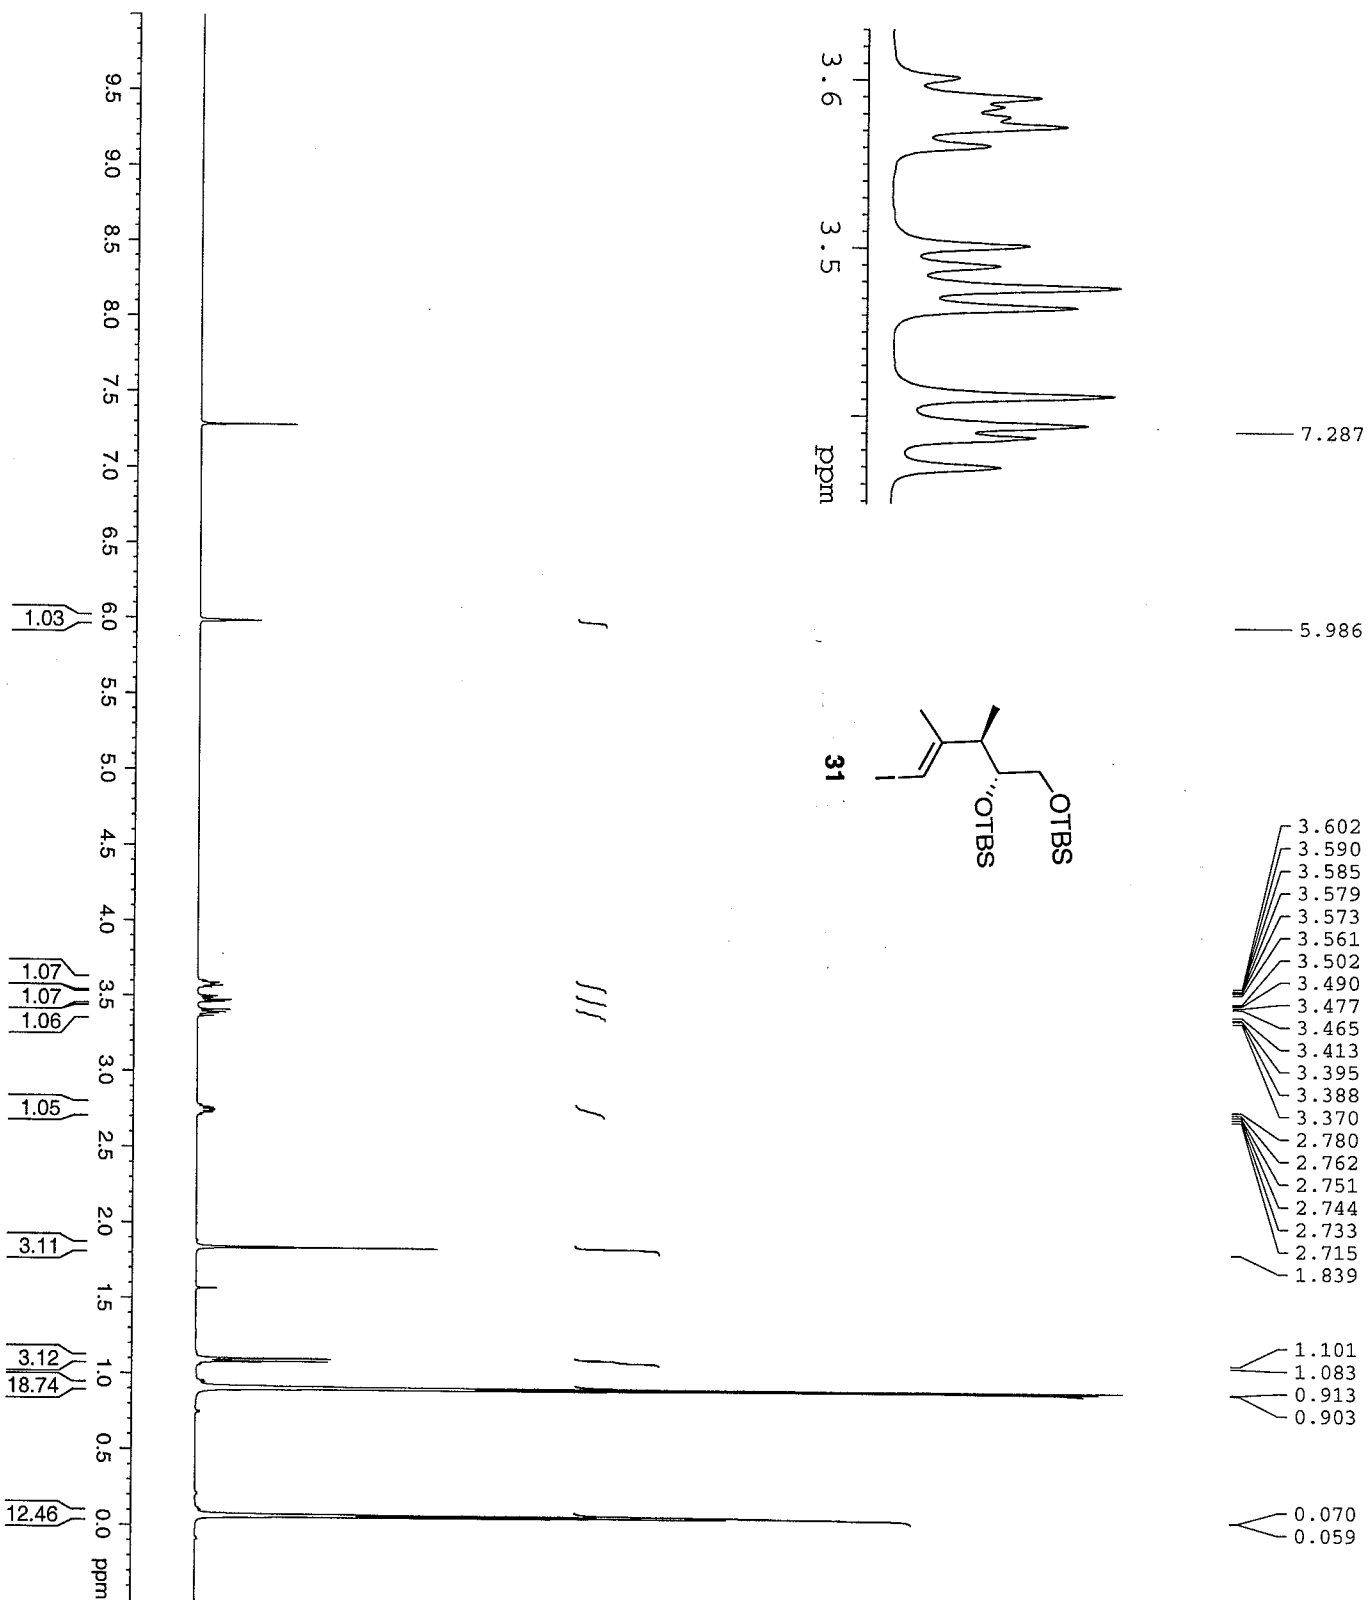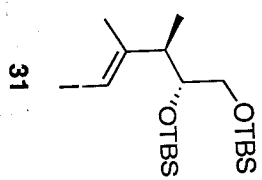

- 3.602
- 3.590
- 3.585
- 3.579
- 3.573
- 3.561
- 3.502
- 3.490
- 3.477
- 3.465
- 3.413
- 3.395
- 3.388
- 3.370
- 2.780
- 2.762
- 2.751
- 2.744
- 2.733
- 2.715
- 1.839
- 1.101
- 1.083
- 0.913
- 0.903
- 0.070
- 0.059

Current Data Parameters  
 Name: SUM-II-74-01-TBS ether  
 Rf: 2  
 P: 1  
 DI: 1  
 USER: subham

F2 - Acquisition Parameters  
 Date\_: 20081130  
 Time: 12.16  
 INSTRUM: DFX400  
 PROHD: 5 mm BBO BB-1H  
 PULPROG: zg30  
 TD: 32768  
 SOLVENT: CDCl3  
 NS: 32  
 DS: 2  
 SMH: 6410.256 Hz  
 FIDRES: 0.135625 Hz  
 AQ: 2.5559540 sec  
 RG: 203.2  
 DW: 78.000 usec  
 DE: 6.00 usec  
 TE: 296.2 K  
 D1: 2.00000000 sec  
 TDO: 1

===== CHANNEL f1 =====  
 NUC1: 1H  
 P1: 14.70 usec  
 PL1: 0.70 dB  
 SFO1: 399.9528000 MHz

F2 - Processing parameters  
 SI: 32768  
 SF: 399.9500000 MHz  
 WDW: EM  
 SSB: 0  
 LB: 0.70 Hz  
 GB: 0  
 PC: 1.00

di-TBS ether

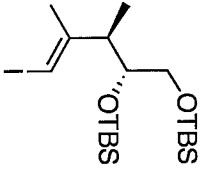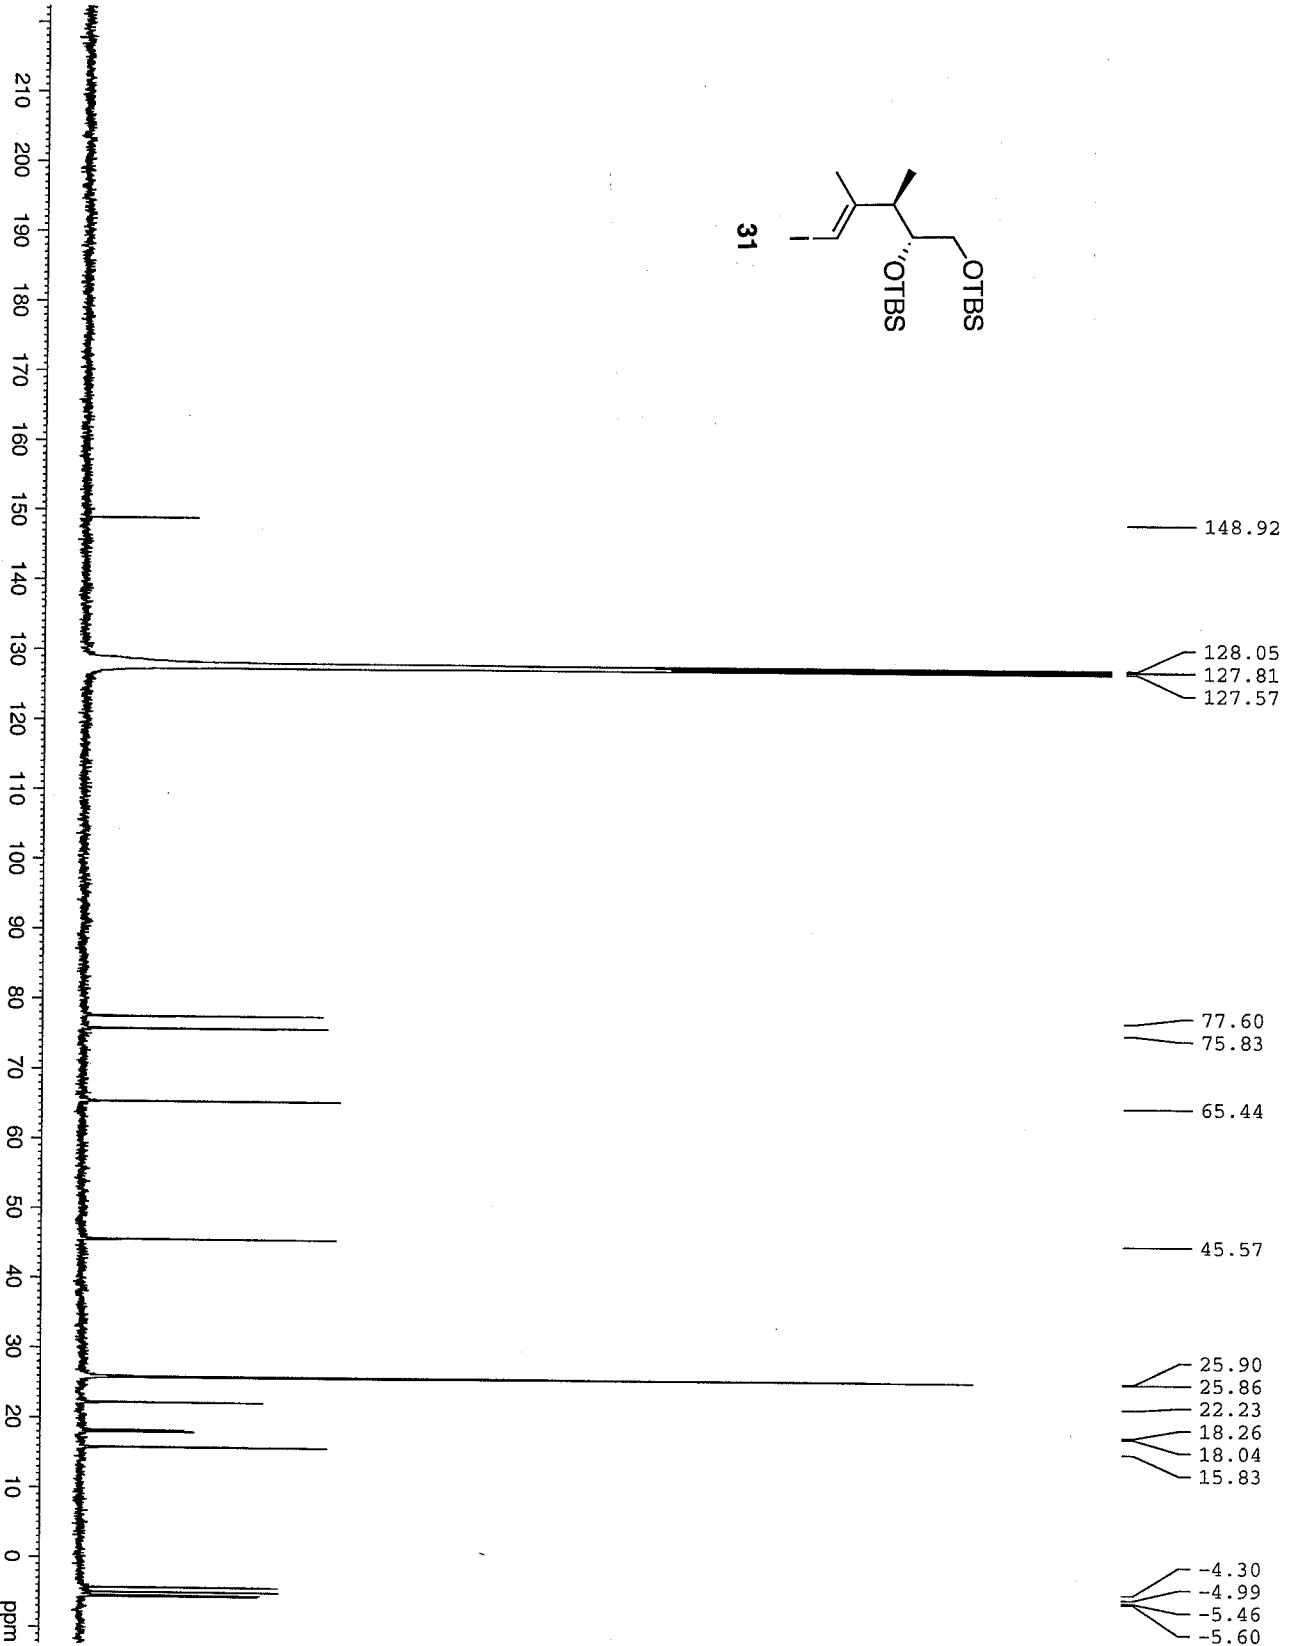

```

Current Data Parameters
NAME      SUM-TI-74-di-TBS et
EXPNO    3
PROCNO   1
DI       1/n
USBR     subham

F2 - Acquisition Parameters
Date_    20081120
Time     12.33
INSTRUM  DPX400
PROBHD   5 mm BBO BB-1H
PULPROG  zgpg30
TD       65536
SOLVENT  C6D6
NS       4667
DS       4
SWH      25125.629 Hz
FIDRES   0.38387 Hz
AQ       1.3042164 sec
RG       16384
DE       19.900 usec
TE       297.2 K
D1       0.15000001 sec
d11      0.03000000 sec
DELTA    0.05000000 sec
TD0      1

===== CHANNEL f1 =====
NUC1      13C
P1       7.80 usec
PL1      -3.00 dB
SFO1     100.5785700 MHz

===== CHANNEL f2 =====
CPDPRG2  waltz16
NUC2      1H
PCPD2    135.00 usec
PI2      17.40 dB
PI12     17.40 dB
PI13     17.40 dB
SFO2     399.9516000 MHz

F2 - Processing parameters
SI       32768
SF       100.5675080 MHz
WDW      EM
SSB      0
LB       3.00 Hz
GB       0
PC       1.40
  
```

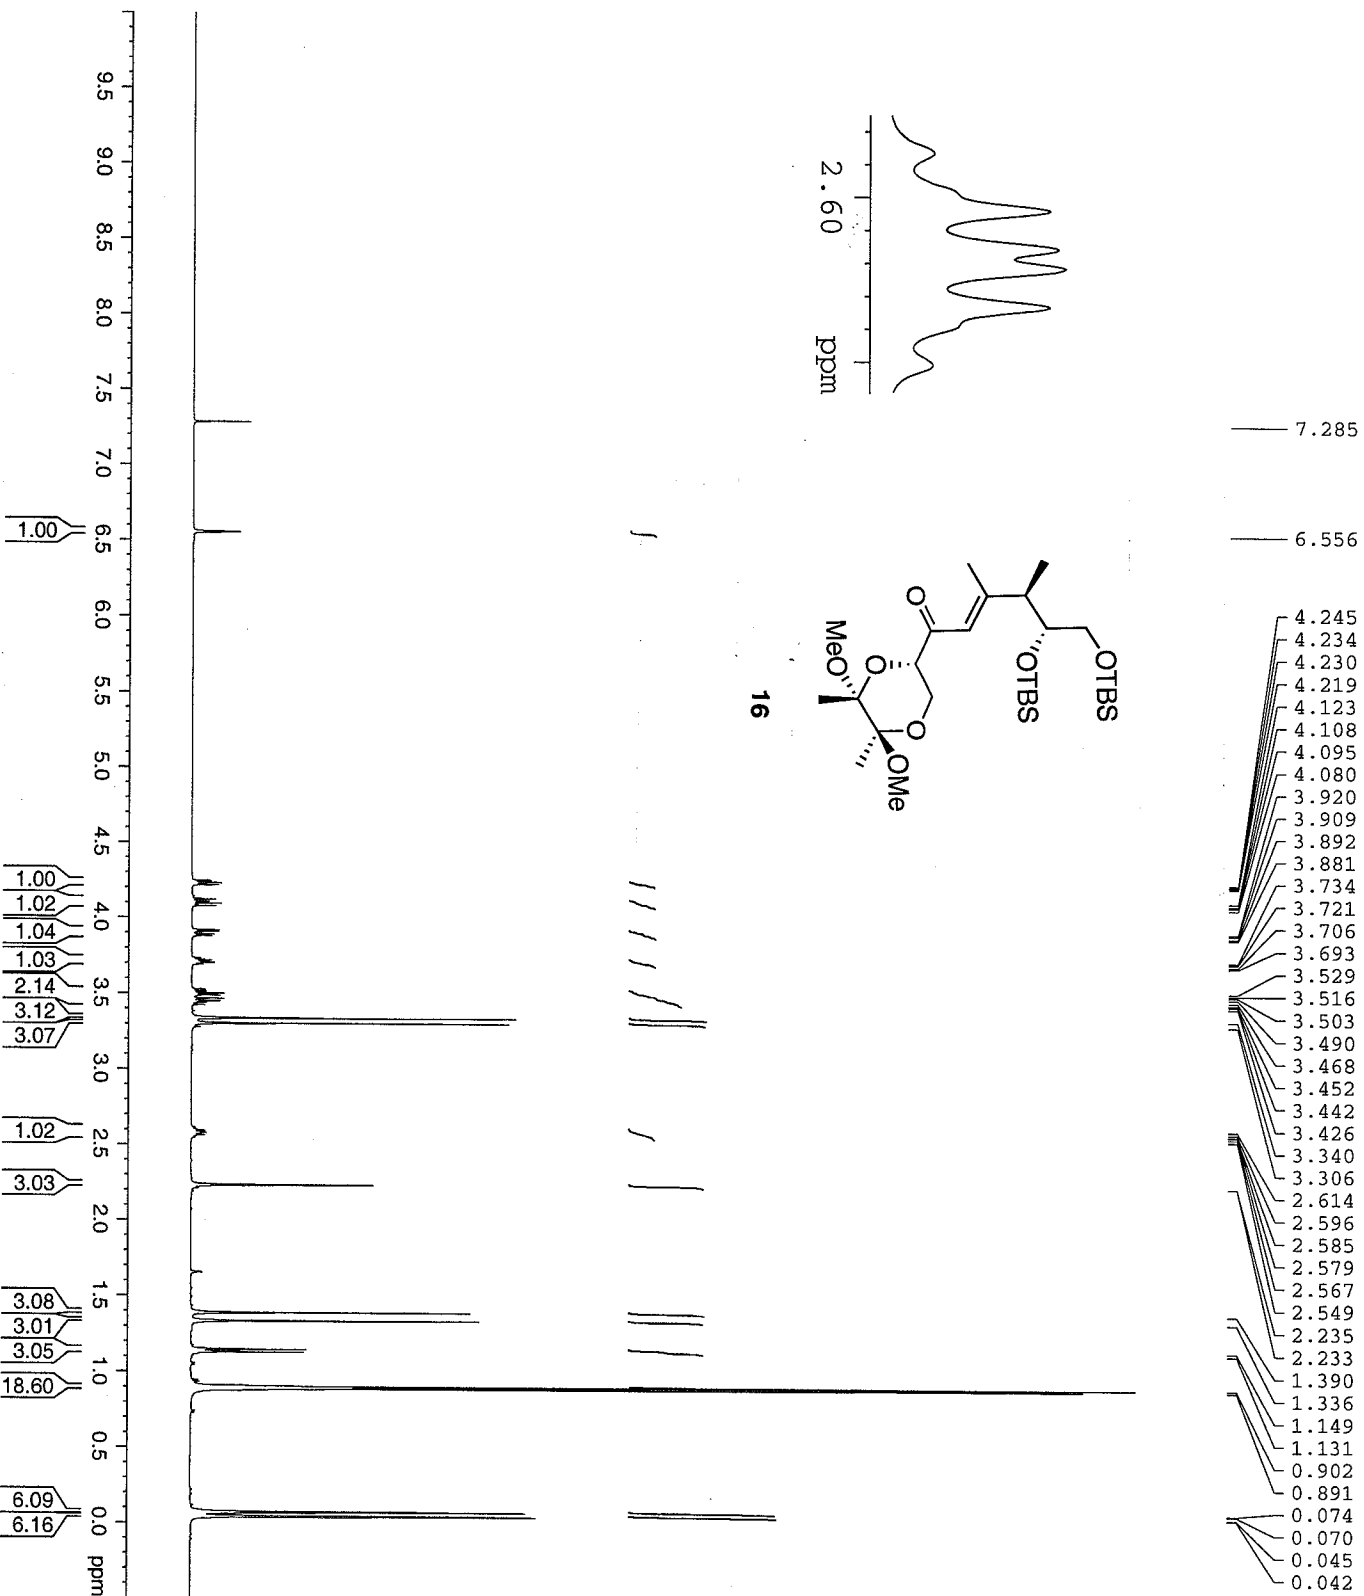

| Chemical Shift (ppm) |
|----------------------|
| 4.245                |
| 4.234                |
| 4.230                |
| 4.219                |
| 4.123                |
| 4.108                |
| 4.095                |
| 4.080                |
| 3.920                |
| 3.909                |
| 3.892                |
| 3.881                |
| 3.734                |
| 3.721                |
| 3.706                |
| 3.693                |
| 3.529                |
| 3.516                |
| 3.503                |
| 3.490                |
| 3.468                |
| 3.452                |
| 3.442                |
| 3.426                |
| 3.340                |
| 3.306                |
| 2.614                |
| 2.596                |
| 2.585                |
| 2.579                |
| 2.567                |
| 2.549                |
| 2.235                |
| 2.233                |
| 1.390                |
| 1.336                |
| 1.149                |
| 1.131                |
| 0.902                |
| 0.891                |
| 0.074                |
| 0.070                |
| 0.045                |
| 0.042                |

| Integration |
|-------------|
| 1.00        |
| 1.02        |
| 1.04        |
| 1.03        |
| 2.14        |
| 3.12        |
| 3.07        |
| 1.02        |
| 3.03        |
| 3.08        |
| 3.01        |
| 3.05        |
| 18.60       |
| 6.09        |
| 6.16        |

```

Current Data Parameters
NAME      SUH-111-16-Enone
EXPNO    4
PROCNO   1
USER     subham
Date_    20090211
Time     22.16
INSTRUM  DPK400
PROBHD   5 mm BBO BB-1H
PULPROG  zg30
TD        32768
SOLVENT  CDCl3
NS        32
DS        2
SWH       6410.256 Hz
FIDRES    0.195625 Hz
AQ        2.5559540 sec
RG        114
DM        78.000 usec
DE        6.00 usec
TE        298.2 K
D1        2.00000000 sec
TD0       1

===== CHANNEL f1 =====
NUC1      1H
P1        14.70 usec
PL1       0.00 dB
SFO1     399.9528000 MHz

F2 - Processing parameters
SI        32768
SF        399.9500000 MHz
WDW       EM
SSB       0
LB        0.70 Hz
GB        0
PC        1.00
    
```



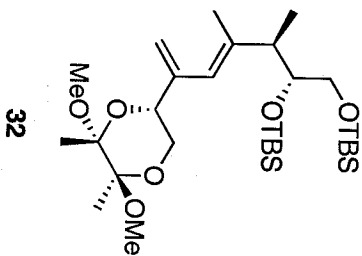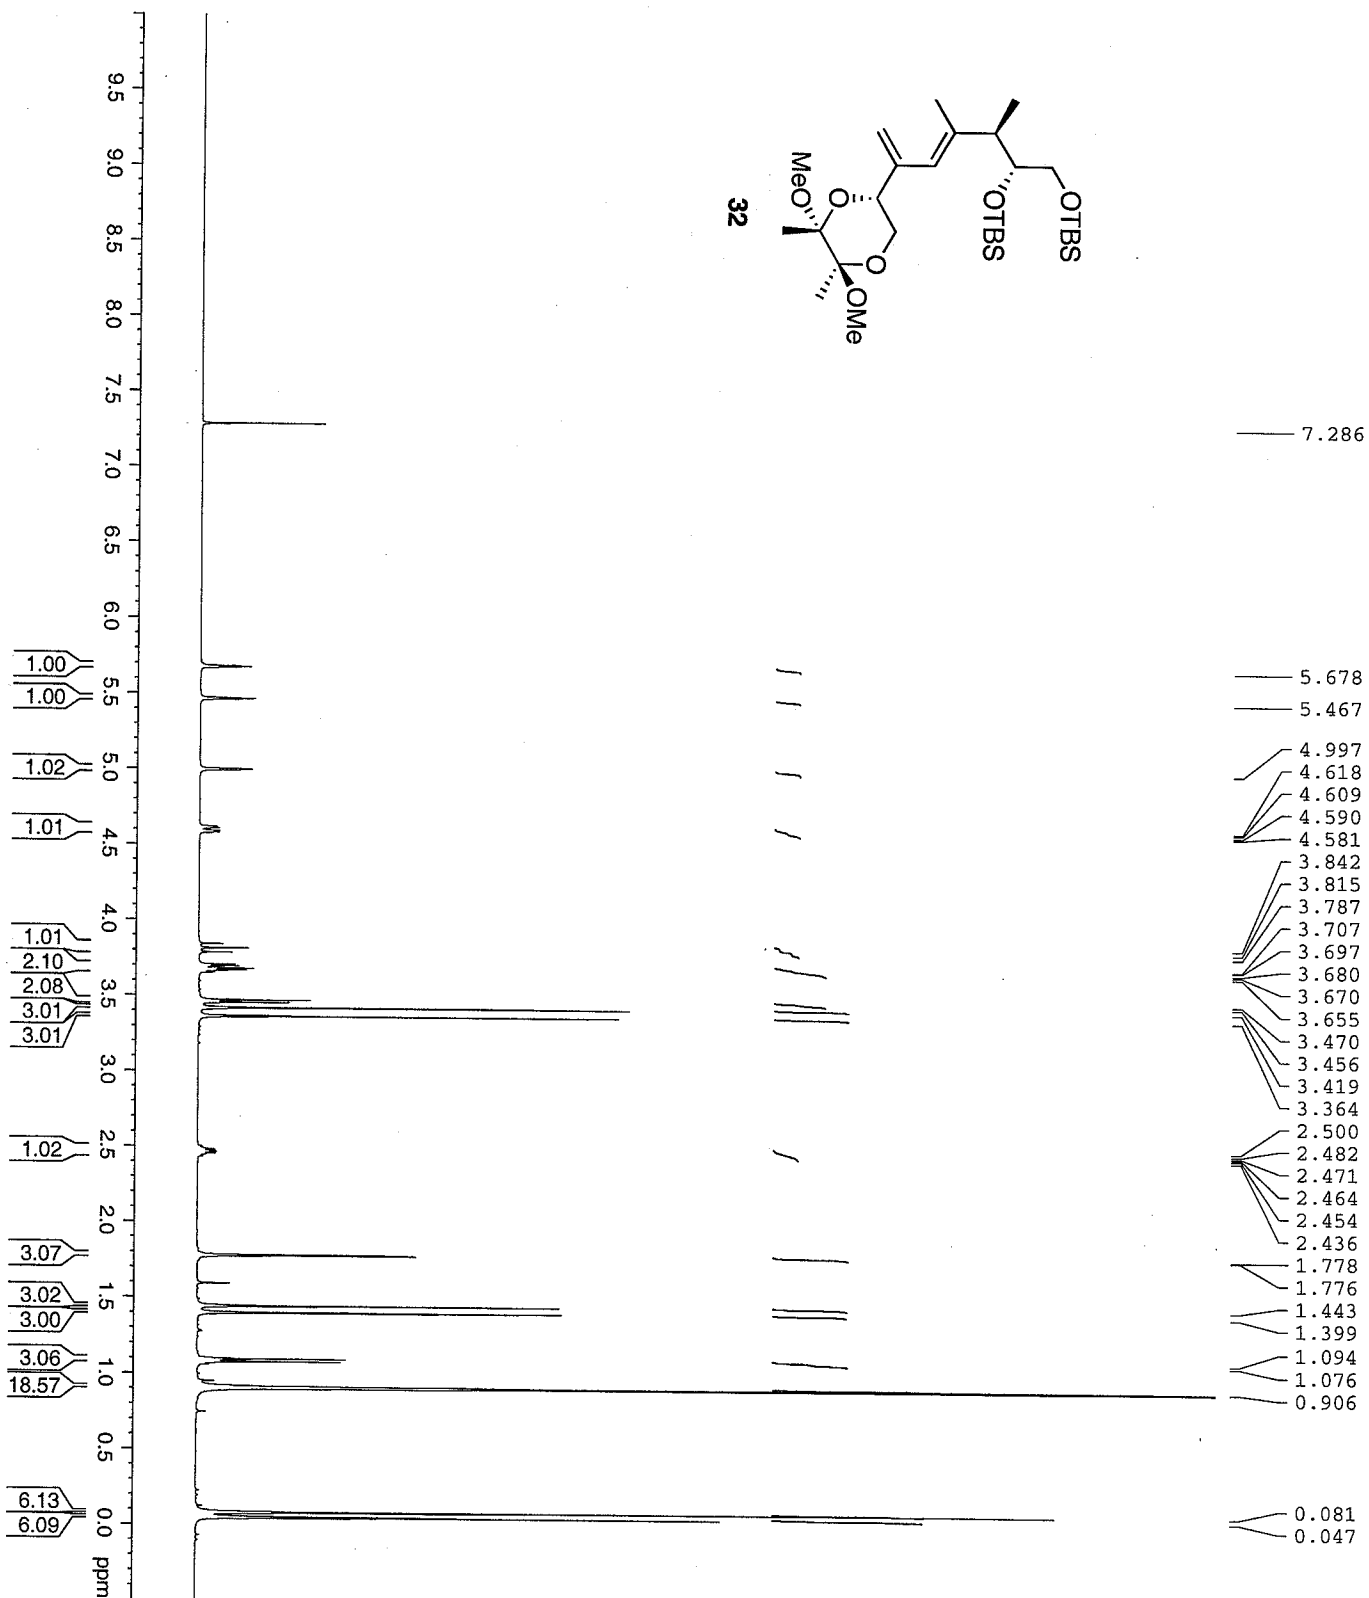

Current Data Parameters  
 NAME SUM-III-17-Diene  
 EXPNO 1  
 PROCNO 1  
 DU /n  
 USER subham

F2 - Acquisition Parameters  
 Date\_ 20090212  
 Time 17.57  
 INSTRUM DPX400  
 PROBHD 5 mm BBO BB-1H  
 PULPROG zg30  
 TD 32768  
 SOLVENT CDCl3  
 NS 32  
 DS 2  
 SWH 6410.256 Hz  
 FIDRES 0.195625 Hz  
 AQ 2.5559540 sec  
 RG 161.3  
 DW 78.000 usec  
 DE 6.00 usec  
 TE 298.2 K  
 D1 2.00000000 sec  
 TD0 1

==== CHANNEL f1 =====  
 NUC1 1H  
 P1 14.70 usec  
 PL 0.00 dB  
 SF01 399.9528000 MHz

F2 - Processing parameters  
 SI 32768  
 SF 399.9500000 MHz  
 WDW EM  
 SSB 0  
 LB 0.70 Hz  
 GB 0  
 PC 1.00





mono TBS diol

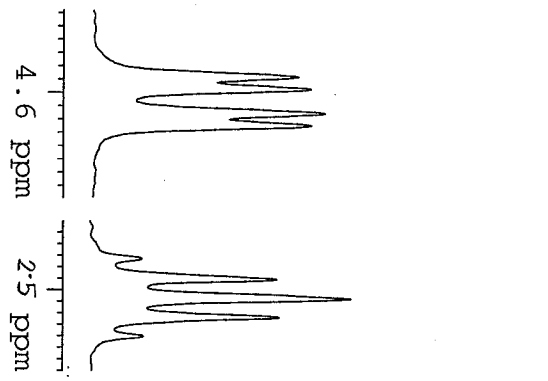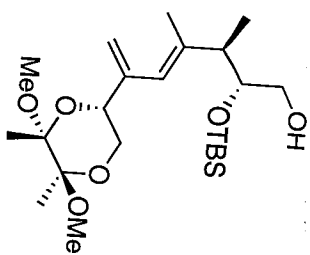

17

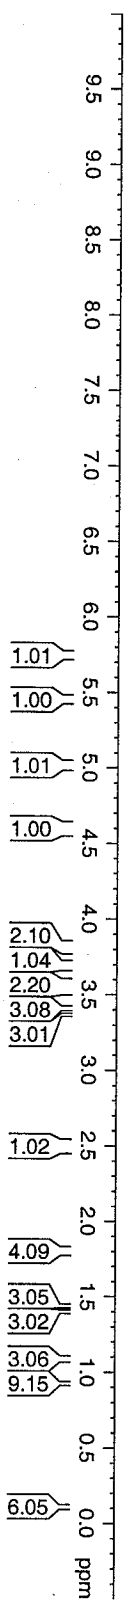

- 7.286
- 5.745
- 5.448
- 5.015
- 4.613
- 4.603
- 4.585
- 4.576
- 3.841
- 3.813
- 3.802
- 3.787
- 3.776
- 3.709
- 3.699
- 3.681
- 3.672
- 3.595
- 3.583
- 3.579
- 3.567
- 3.555
- 3.551
- 3.541
- 3.530
- 3.516
- 3.501
- 3.408
- 3.364
- 2.527
- 2.510
- 2.494
- 2.477
- 2.460
- 1.819
- 1.804
- 1.791
- 1.788
- 1.435
- 1.396
- 1.093
- 1.075
- 0.921
- 0.111
- 0.098

Current Data Parameters  
 NAME: SUH-III-83-mono TBS diol  
 PROCNO: 1  
 F2 - Acquisition Parameters  
 Date\_: 20090605  
 Time: 11:40:01  
 INSTRUM: DPX400  
 PROBRD: 5 mm BBO BB-1H  
 PULPROG: zg30  
 TD: 32768  
 SOLVENT: CDCl3  
 NS: 32  
 DS: 2  
 SWH: 6410.212 Hz  
 FIDRES: 0.195625 Hz  
 AQ: 2.5559540 sec  
 RG: 203.2  
 DE: 78.000 usec  
 TE: 298.2 K  
 D1: 2.00000000 sec  
 TDO: 1  
 CHANNEL F1: =====  
 NUC1: 1H  
 P1: 14.70 usec  
 PL1: 0.00 dB  
 SFO1: 399.9528000 MHz  
 F2 - Processing parameters  
 SI: 399.9500000 MHz  
 SF: 32768  
 WDW: EM  
 SSB: 0  
 LB: 0.70 Hz  
 GB: 0  
 PC: 1.00

mono TBS diol

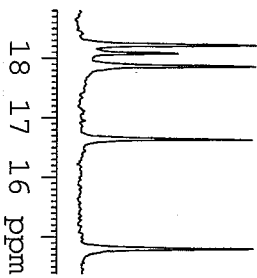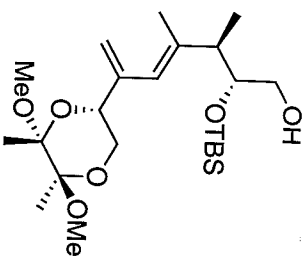

17

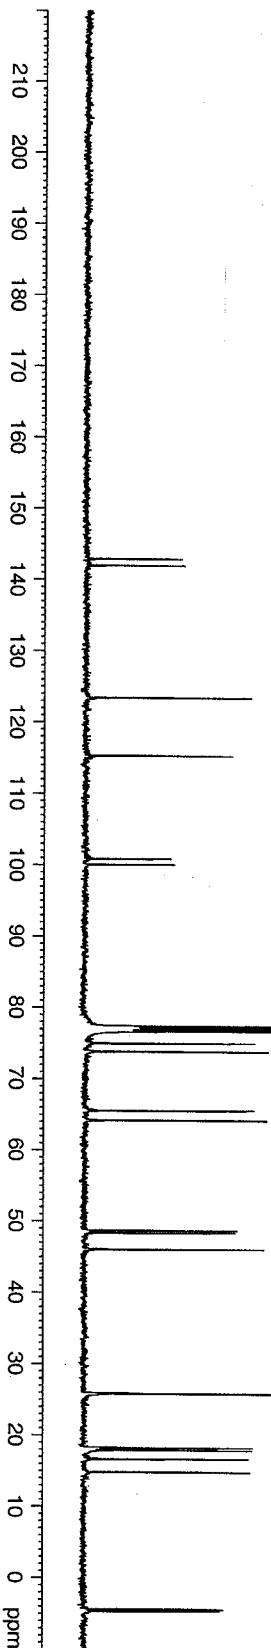

|        |
|--------|
| 142.88 |
| 141.95 |
| 123.41 |
| 115.27 |
| 100.86 |
| 100.06 |
| 77.34  |
| 77.02  |
| 76.70  |
| 75.00  |
| 73.82  |
| 65.56  |
| 64.20  |
| 48.68  |
| 48.35  |
| 46.05  |
| 25.85  |
| 18.24  |
| 18.09  |
| 17.88  |
| 16.65  |
| 14.82  |
| 4.39   |
| 4.66   |

```

Current Data Parameters
NAME      SVM-III-83-mono TBS d
EXPNO    2
PROCNO   1
DU       /n
USER     subham

F2 - Acquisition Parameters
Date_    20090606
Time     4.05
INSTRUM  DPK400
PROBHD   5 mm BBO BB-1H
PULPROG  zgpg30
TD       65536
SOLVENT  12741
DS       4
SMH      25125.629 Hz
FIDRES   0.383387 Hz
AQ       1.3042164 sec
RG       16384
DE       19.900 usec
TE       299.2 K
D1       0.15000001 sec
d11      0.03000000 sec
DELTA    0.05000000 sec
TD0      1

===== CHANNEL f1 =====
NUC1     13C
P1       7.80 usec
PL1      -3.00 dB
SFO1     100.5785700 MHz

===== CHANNEL f2 =====
CPDPRG2  waltz16
NUC2     1H
P2       135.00 usec
PL2      0.00 dB
PL12     17.40 dB
PL13     17.40 dB
SFO2     399.9516000 MHz

F2 - Processing parameters
SI       32768
SF       100.5675080 MHz
WDW      EM
SSB      0
LB       3.00 Hz
GB       0
PC       1.40
  
```

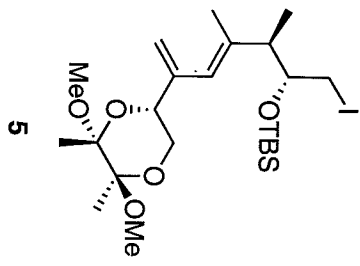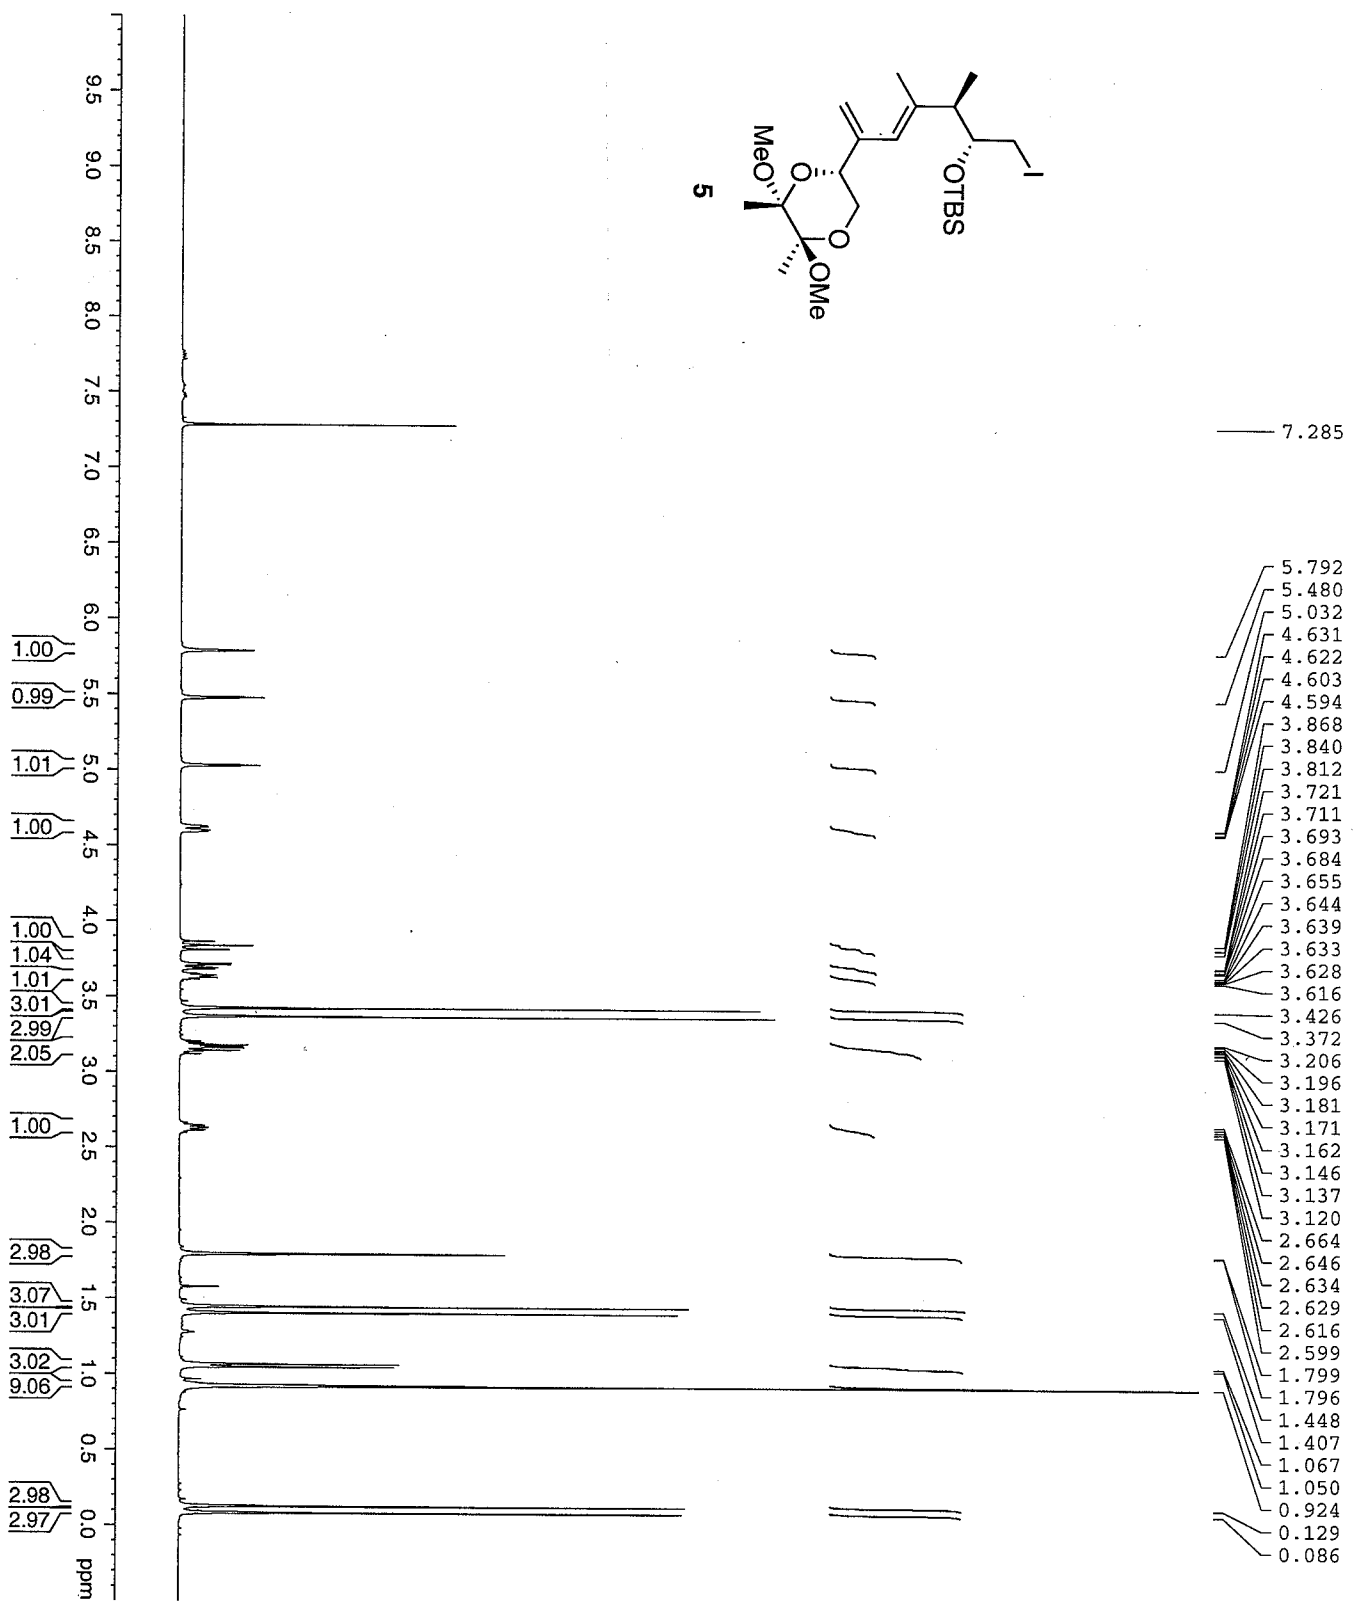

|       |
|-------|
| 5.792 |
| 5.480 |
| 5.032 |
| 4.631 |
| 4.622 |
| 4.603 |
| 4.594 |
| 3.868 |
| 3.840 |
| 3.812 |
| 3.721 |
| 3.711 |
| 3.693 |
| 3.684 |
| 3.655 |
| 3.644 |
| 3.639 |
| 3.633 |
| 3.628 |
| 3.616 |
| 3.426 |
| 3.372 |
| 3.206 |
| 3.196 |
| 3.181 |
| 3.171 |
| 3.162 |
| 3.146 |
| 3.137 |
| 3.120 |
| 2.664 |
| 2.646 |
| 2.634 |
| 2.629 |
| 2.616 |
| 2.599 |
| 1.799 |
| 1.796 |
| 1.448 |
| 1.407 |
| 1.067 |
| 1.050 |
| 0.924 |
| 0.129 |
| 0.086 |

|      |
|------|
| 1.00 |
| 0.99 |
| 1.01 |
| 1.00 |
| 1.00 |
| 1.04 |
| 1.01 |
| 3.01 |
| 2.99 |
| 2.05 |
| 1.00 |
| 2.98 |
| 3.07 |
| 3.01 |
| 3.02 |
| 9.06 |
| 2.98 |
| 2.97 |

Current Data Parameters  
 Name: SUM-111-74-Iodide  
 ExpNo: 5  
 ProcNo: 1  
 DU: /n  
 User: subham

F2 - Acquisition Parameters  
 Date\_: 20090526  
 Time: 15.04  
 Instrum: DPK400  
 Probnm: 5 mm BBO BB-1H  
 PULPROG: zg30  
 TD: 32768  
 SOLVENT: CDCl3  
 NS: 32  
 DS: 2  
 SWH: 6410.256 Hz  
 FIDRES: 0.195625 Hz  
 AQ: 2.5559540 sec  
 RG: 203.2  
 DW: 78.000 usec  
 DR: 6.00 usec  
 TR: 298.2 K  
 D1: 2.00000000 sec  
 TDO: 1

==== CHANNEL f1 =====  
 NUC1: 1H  
 P1: 14.70 usec  
 PL: 0.00 dB  
 SF01: 399.9528000 MHz

F2 - Processing parameters  
 SI: 32768  
 SF: 399.9500000 MHz  
 WDW: EM  
 SSB: 0  
 LB: 0.70 Hz  
 GB: 0  
 PC: 1.00

Iodide

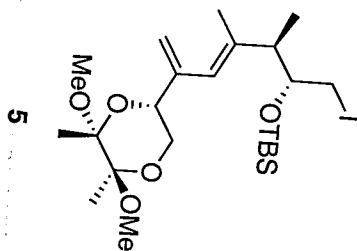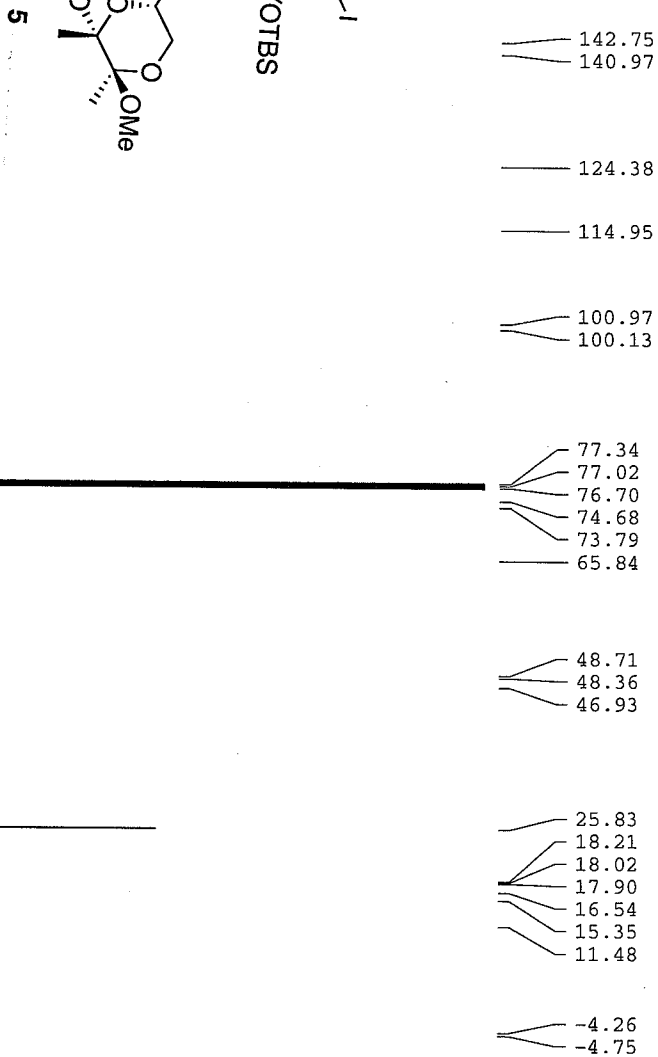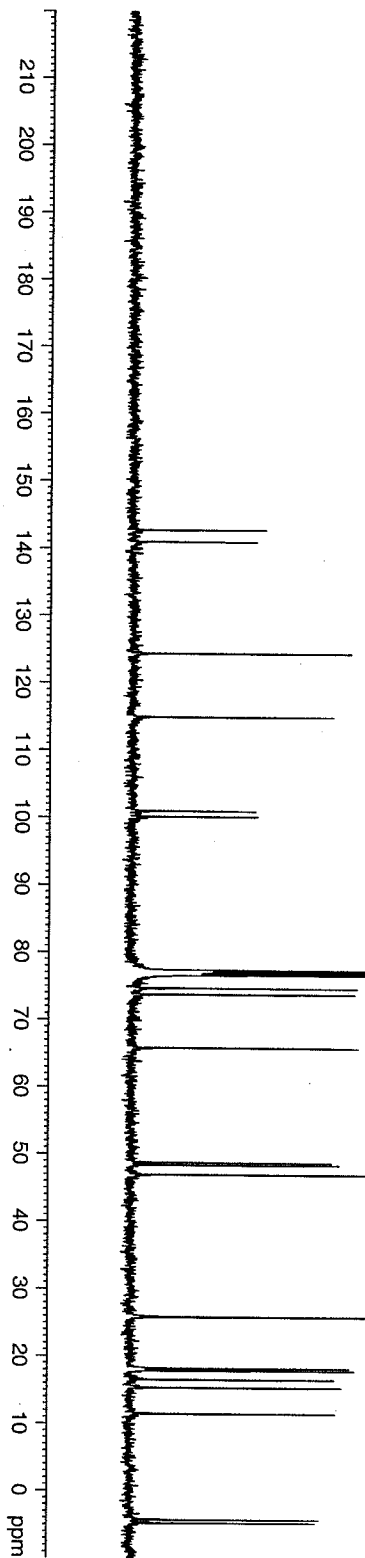

Current Data Parameters  
 NAME SUM-III-85-Iodide  
 EXPNO 4  
 PROCNO 1  
 DU /n  
 USER subham

F2 - Acquisition Parameters  
 Date\_ 20090615  
 Time 17:47  
 INSTRUM DPX400  
 PROBHD 5 mm BBO BB-1H  
 PULPROG zgpg30  
 TD 65536  
 SOLVENT NS  
 DS 4  
 SWH 25125.629 Hz  
 FIDRES 0.383387 Hz  
 AQ 1.3042164 sec  
 RG 16384  
 DW 15.990 usec  
 DE 6.00 usec  
 TR 299.2 K  
 DI 0.1500001 sec  
 d11 0.0300000 sec  
 DELTA 0.0500000 sec  
 TDO 1

==== CHANNEL F1 =====  
 NUCL 13C  
 P1 7.80 usec  
 PL1 -3.00 dB  
 SFO1 100.5785700 MHz

==== CHANNEL F2 =====  
 CPDPRG2 waltz16  
 NUCL 1H  
 PCPD2 135.00 usec  
 PL2 17.40 dB  
 PL12 17.40 dB  
 PL13 17.40 dB  
 SFO2 399.9516000 MHz

F2 - Processing parameters  
 SI 32768  
 SF 100.5675080 MHz  
 WDW EM  
 SSB 0  
 LB 3.00 Hz  
 GB 0  
 PC 1.40

Alcohol

|       |
|-------|
| 7.364 |
| 7.353 |
| 7.315 |
| 7.306 |
| 7.293 |
| 7.285 |
| 4.538 |
| 4.531 |
| 4.018 |
| 4.006 |
| 3.994 |
| 3.981 |
| 3.969 |
| 3.947 |
| 3.936 |
| 3.926 |
| 3.915 |
| 3.901 |
| 3.890 |
| 3.731 |
| 3.725 |
| 3.666 |
| 3.659 |
| 3.402 |
| 3.395 |
| 3.380 |
| 3.362 |
| 3.346 |
| 3.338 |
| 3.323 |
| 2.087 |
| 2.070 |
| 2.053 |
| 2.027 |
| 2.010 |
| 1.745 |
| 1.733 |
| 1.724 |
| 1.711 |
| 1.699 |
| 1.685 |
| 1.674 |
| 1.665 |
| 1.653 |
| 1.643 |
| 1.631 |
| 1.618 |
| 1.608 |
| 1.595 |
| 1.550 |
| 1.537 |
| 1.532 |
| 1.485 |
| 1.466 |
| 1.460 |
| 1.333 |
| 1.325 |
| 1.313 |
| 1.304 |
| 1.299 |
| 1.290 |
| 1.270 |
| 1.186 |
| 1.175 |
| 1.165 |
| 1.150 |
| 1.144 |
| 1.129 |
| 1.117 |
| 1.100 |
| 1.087 |
| 1.074 |
| 1.013 |
| 0.996 |

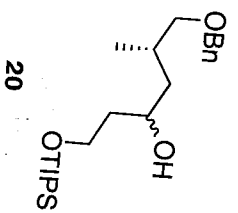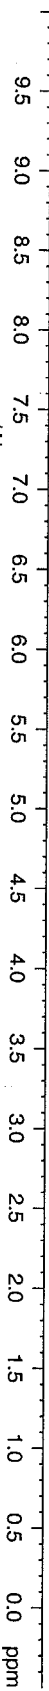

4.03  
1.57

2.00

3.04  
0.65  
0.40

2.05

1.03

4.01

0.99  
21.82  
3.05

Current Data Parameters  
 Name: SDM-III-60-Alc  
 Expno: 3  
 Procno: 1  
 DU: /n  
 User: subham

F2 - Acquisition Parameters  
 Date\_: 20090616  
 Time: 16.01  
 Instrum: DPX400  
 Probhd: 5 mm BBO BB-1H  
 Pulprog: zg30  
 TD: 32768  
 Solvent: CDCl3  
 NS: 32  
 DS: 2  
 SMH: 6410.256  
 FIDRES: 0.195625  
 AQ: 2.5559540  
 RG: 101.6  
 DW: 78.000  
 DE: 6.00  
 TE: 299.2  
 D1: 2.0000000  
 TDO: 1

==== CHANNEL f1 ===  
 NUC1: 1H  
 P1: 14.70  
 PL1: 0.00  
 SFO1: 399.9528000

F2 - Processing Parameters  
 SI: 32768  
 SF: 399.9500000  
 WDW: EM  
 SSB: 0  
 LB: 0.70  
 GB: 0  
 PC: 0

21.82  
3.05

Alcohol

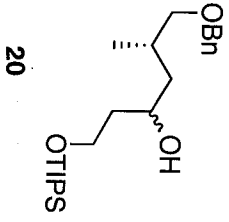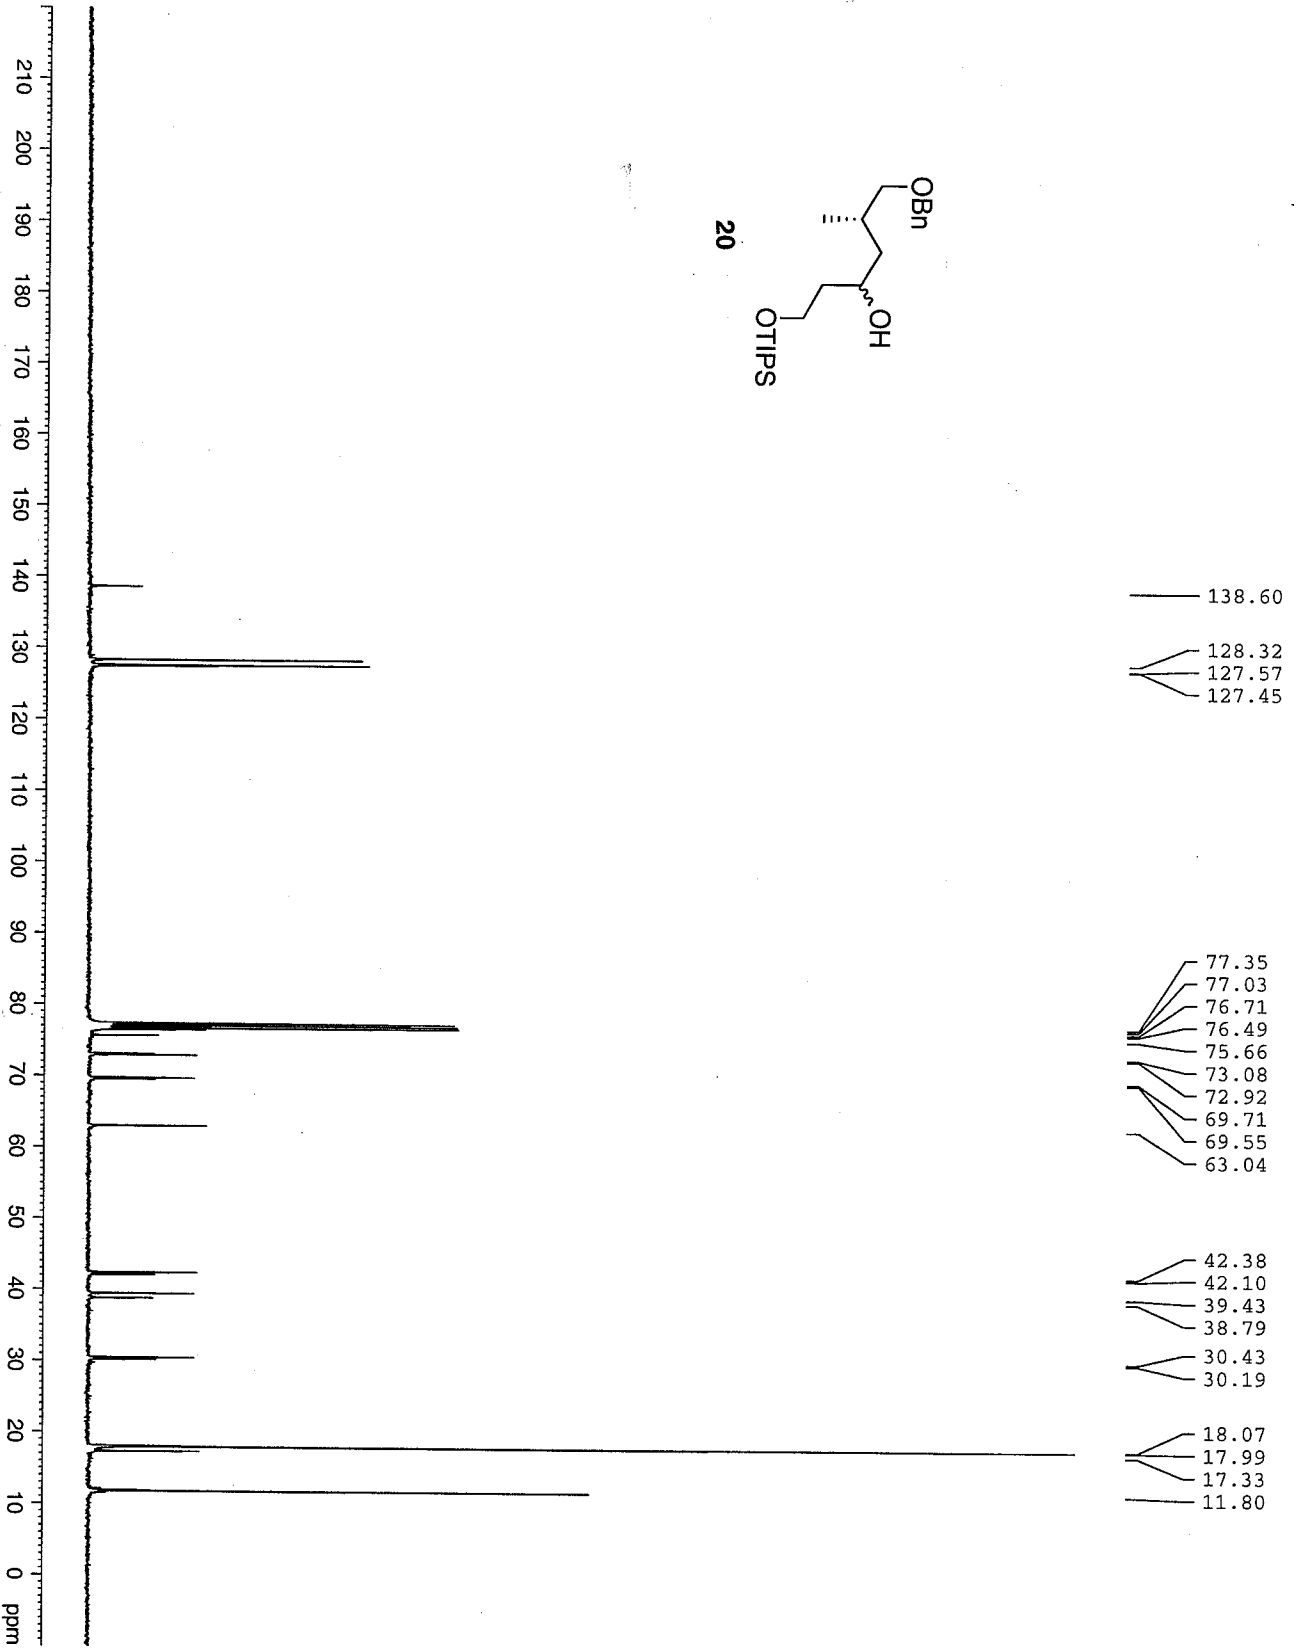

Current Data Parameters  
 SUM-III-60-Alcch

| NAME | EXPNO | PROCNO | DV | USER | subham |
|------|-------|--------|----|------|--------|
| NAME | 4     | 1      | /n |      |        |

F2 - Acquisition Parameters  
 Date\_ 20090616  
 Time 18.35  
 INSTRUM DPX400  
 PROBHD 5 mm BBO BB-1H  
 PULPROG zgpg30  
 TD 65536  
 SOLVENT  
 NS 6000  
 DS 4  
 SWH 25125.629 Hz  
 FIDRES 0.383387 Hz  
 AQ 1.3042164 s  
 RG 16384  
 DW 19.900 us  
 DE 6.00 us  
 TE 299.2 K  
 D1 0.15000001 s  
 d11 0.03000000 s  
 DELTA 0.05000000 s  
 TD0 1

==== CHANNEL f1 =====  
 NUC1 13C  
 P1 7.80 us  
 PL1 -3.80 dB  
 SFO1 100.5785780 MHz

==== CHANNEL f2 =====  
 CPDPRG2 waitz216  
 NUC2 1H  
 PCPD2 135.00 us  
 PL2 17.40 dB  
 PL12 17.40 dB  
 PL13 17.40 dB  
 SFO2 399.9516000 MHz

F2 - Processing Parameters:  
 SI 32768  
 SF 100.5675080 MHz  
 MDM EM  
 SSB 0  
 LB 3.00 Hz  
 GB 0  
 PC 1.40

Ketone

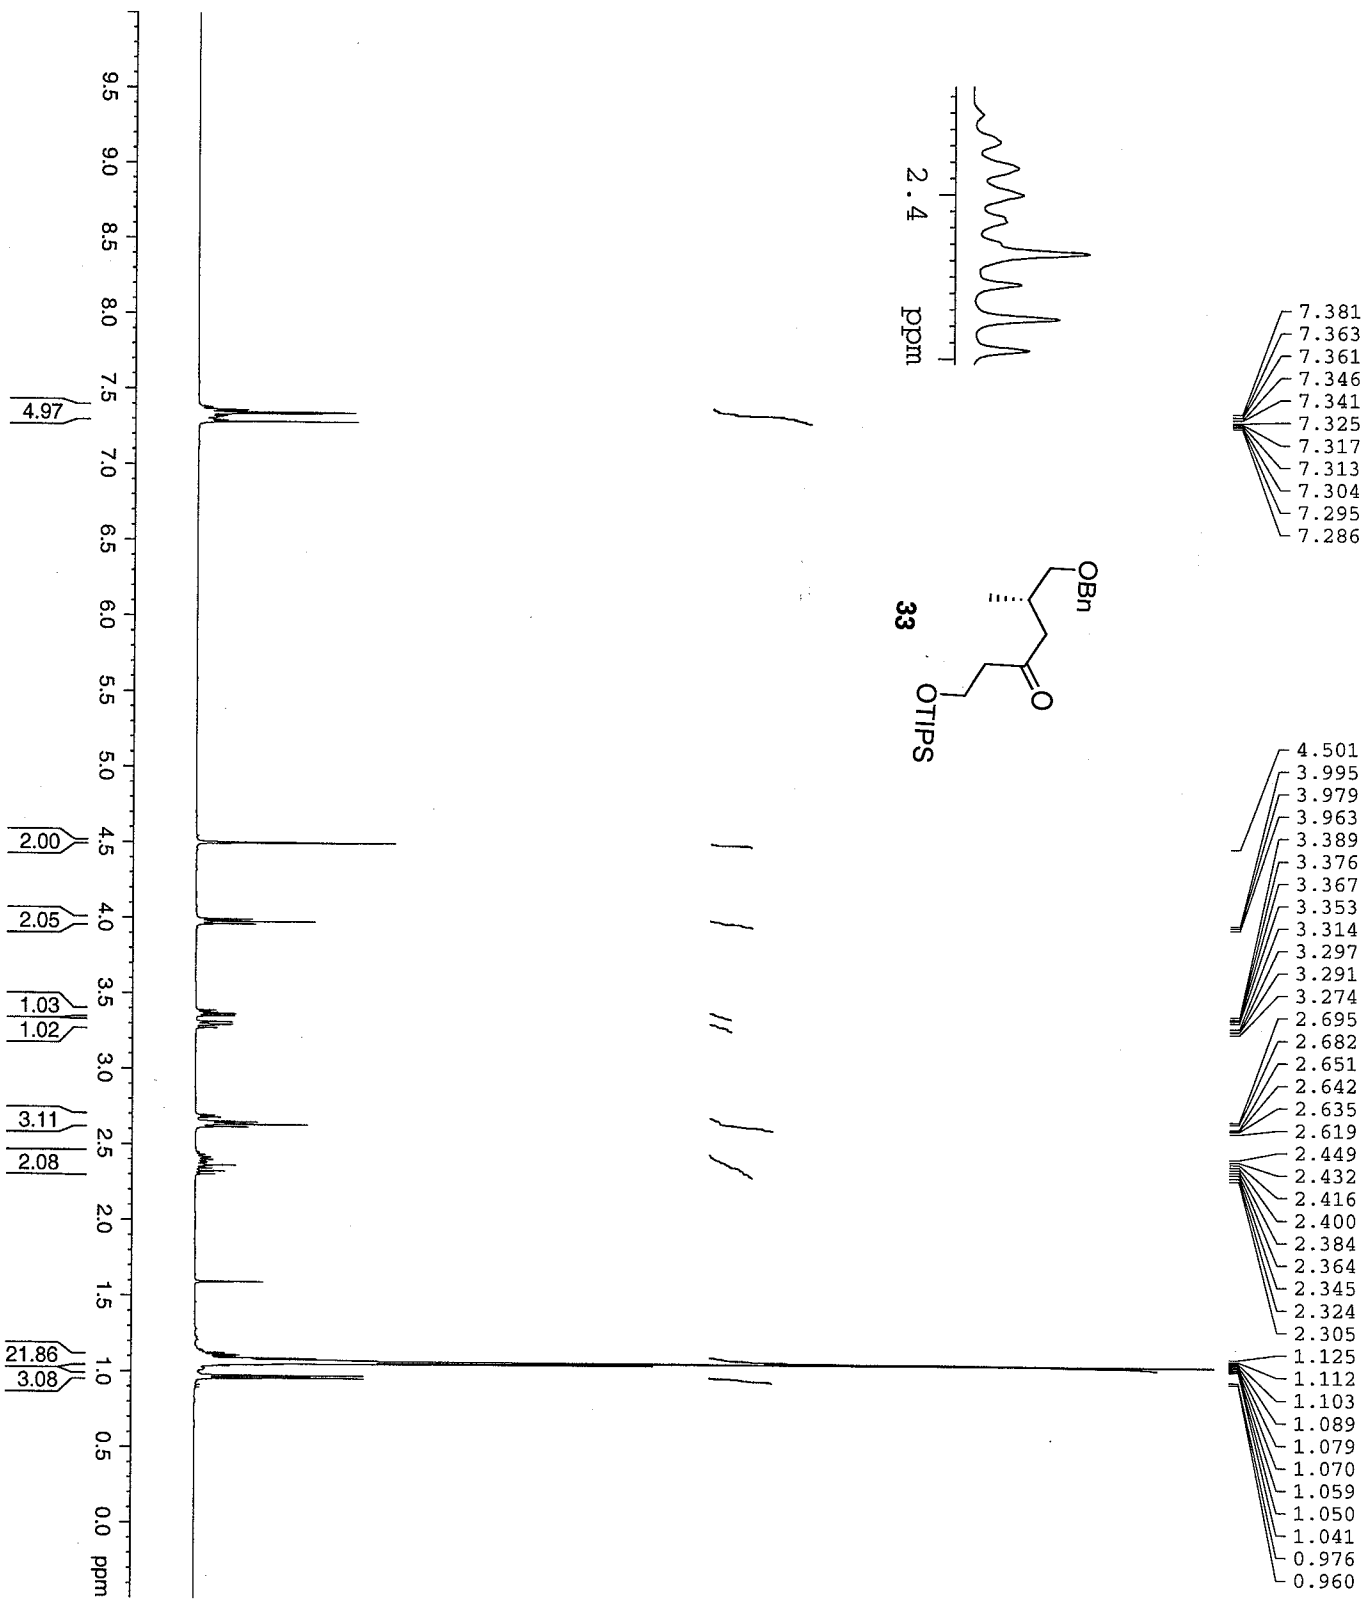

```

Current Data Parameters
NAME      SUM-III-61-Ketone
EXPNO    4
PROCNO   1
DU       /n
USER     subham

F2 - Acquisition Parameters
Date_    20090601
Time     22.09
INSTRUM  DPX400
PROBHD   5 mm BBO BB-1H
PULPROG  zg30
TD       32768
SOLVENT  CDCl3
NS       32
DS       2
SWH      6410.256 Hz
FIDRES   0.195625 Hz
AQ       2.5559540 sec
RG       203.2
DM       78.000 usec
DE       6.00 usec
TE       302.2 K
D1       2.00000000 sec
TD0      1

===== CHANNEL f1 =====
NUC1     1H
P1       14.70 usec
PL1      0.00 dB
SFO1     399.9528000 MHz

F2 - Processing parameters
SI       32768
SF       399.9500000 MHz
WDW      EM
SSB      0
LB       0.70 Hz
GB       0
PC       1.00
  
```

Ketone

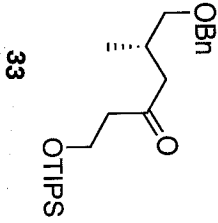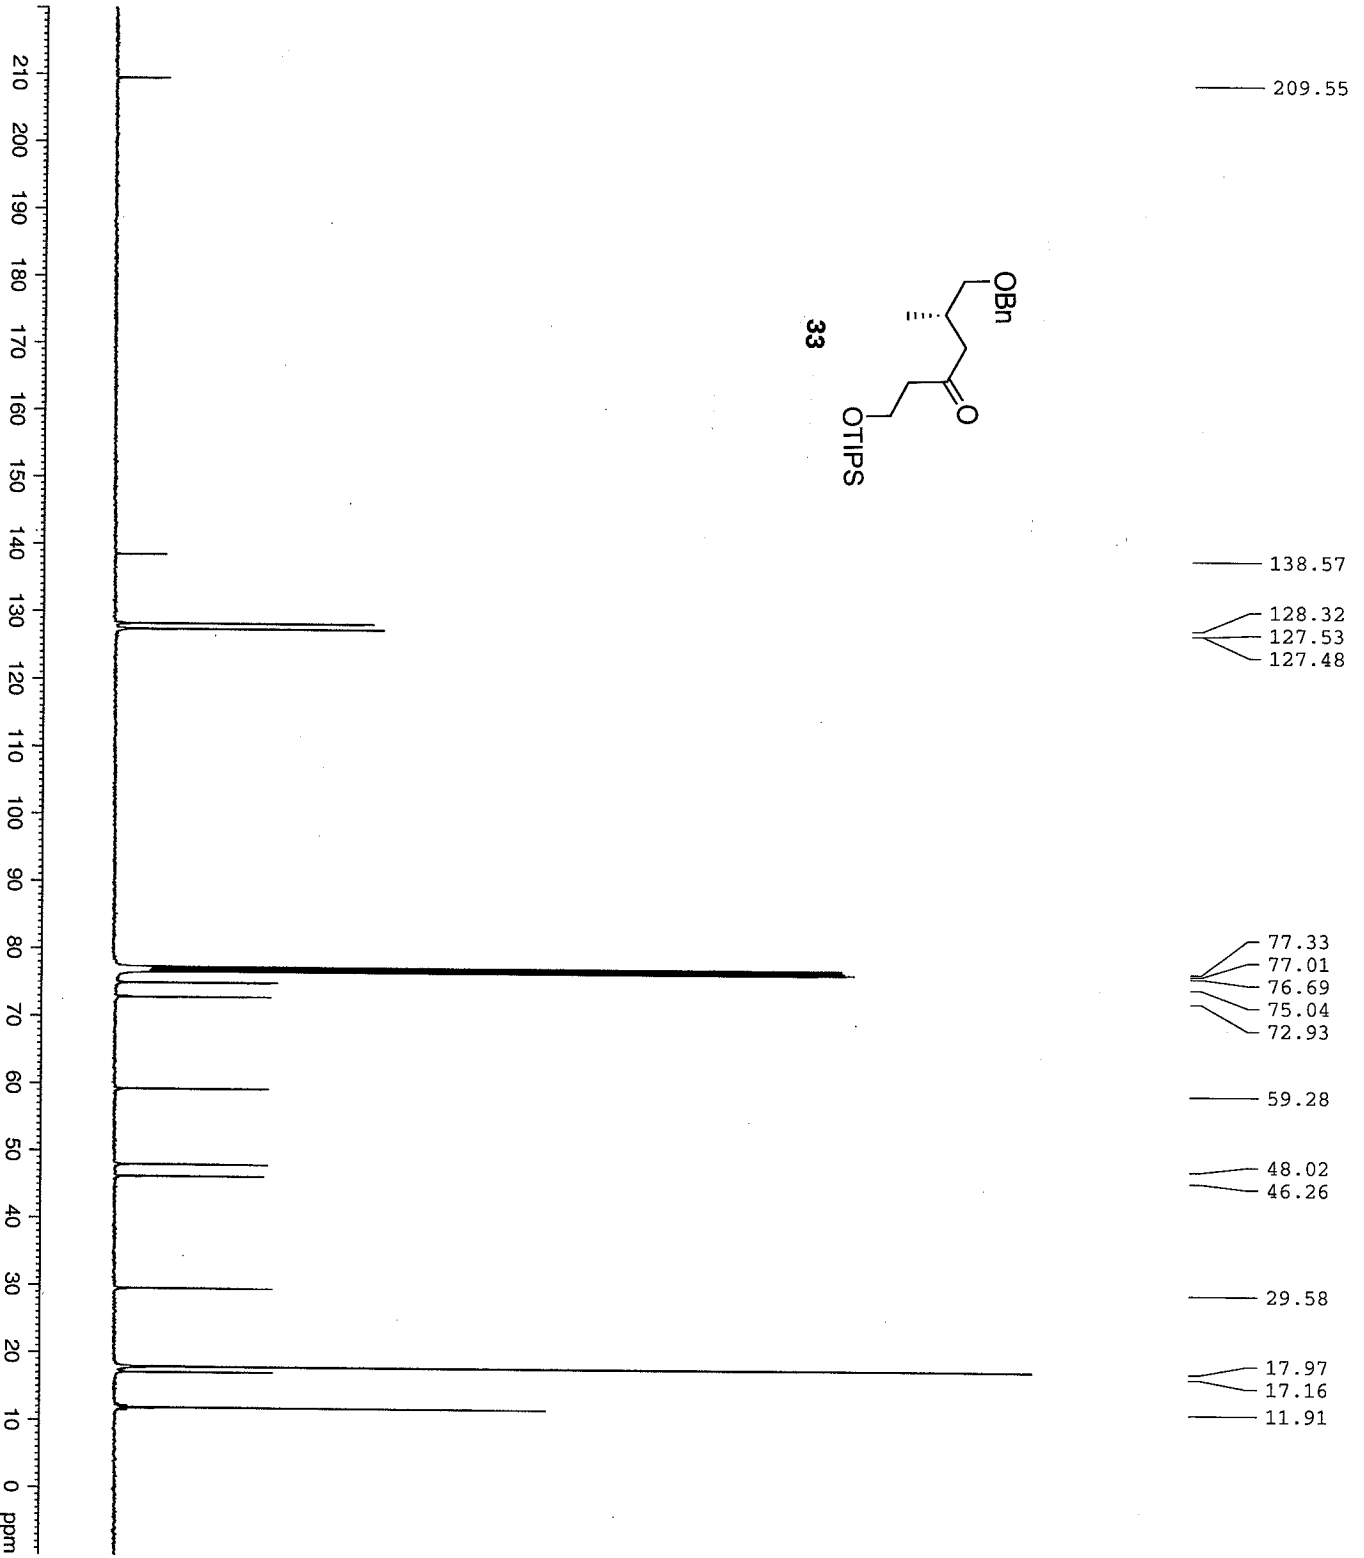

Current Data Parameters  
 NAME SWH-III-61-Ketone  
 EXPNO 7  
 PROCNO 1  
 DU /h  
 USER subham

F2 - Acquisition Parameters  
 Date\_ 20090601  
 Time 22 32  
 INSTRUM DFX400  
 PROBD 5 mm BBO BB-1H  
 PULPROG zgpg30  
 TD 65536  
 SOLVENT NS  
 NS 24413  
 DS 4  
 SWH 25125.629 Hz  
 FIDRES 0.383387 Hz  
 AQ 1.3042164 sec  
 RG 16384  
 DW 19.900 usec  
 DE 6.000 usec  
 TE 302.2 K  
 D1 0.1500001 sec  
 D11 0.0300000 sec  
 DELTA 0.0500000 sec  
 TDO 1

==== CHANNEL F1 =====  
 NUC1 13C  
 P1 7.80 usec  
 PL1 -3.00 dB  
 SF01 100.5785700 MHz

==== CHANNEL F2 =====  
 CPDPRG2 waitz16  
 NUC2 1H  
 PCPD2 135.00 usec  
 PL2 17.40 dB  
 PL12 17.40 dB  
 PL13 17.40 dB  
 SF02 399.9516000 MHz

F2 - Processing parameters  
 SI 32768  
 SF 100.5675080 MHz  
 WDW EM  
 SSB 0  
 LB 3.00 Hz  
 GB 0  
 PC 1.40



Ketal

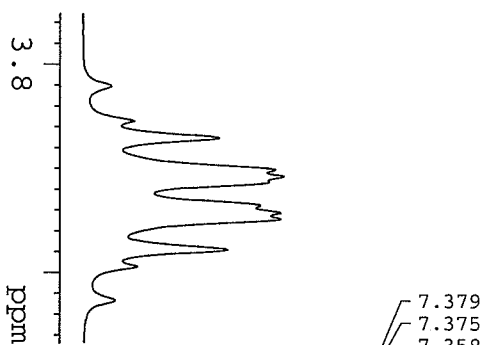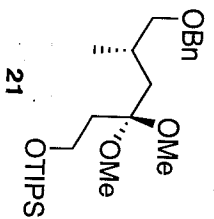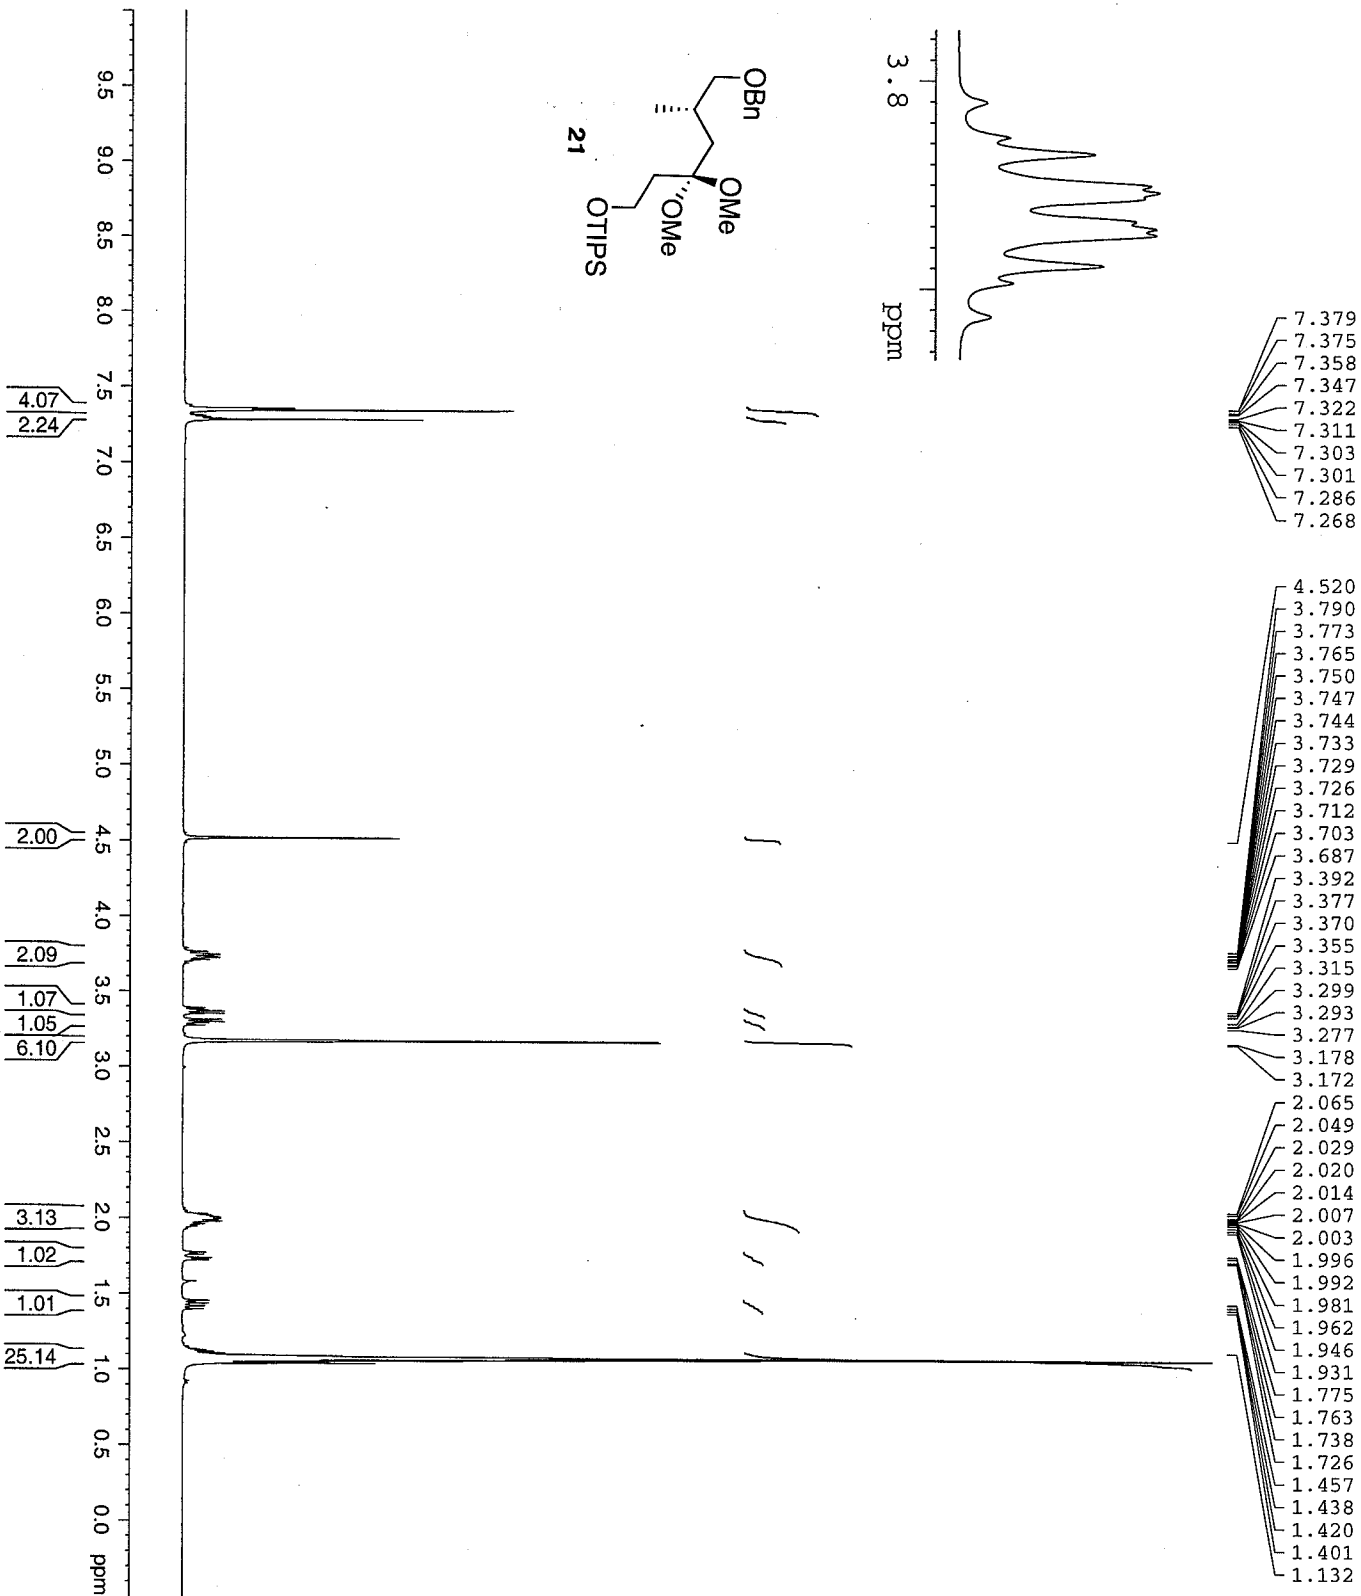

Current Data Parameters  
 Name SUM-111-79-Ketal  
 ExpNO 2  
 ProcNO 1  
 DU /n  
 User subham

F2 - Acquisition Parameters  
 Date\_ 20090602  
 Time 15.24  
 INSTRUM DPX400  
 PROBHD 5 mm BBO BB-1H  
 PULPROG zg30  
 TD 32768  
 SOLVENT CDCl3  
 NS 32  
 DS 2  
 SWH 6410.256 Hz  
 FIDRES 0.195625 Hz  
 AQ 2.5559540 sec  
 RG 203.2  
 DW 78.000 usec  
 DE 6.00 usec  
 TE 301.2 K  
 D1 1  
 DDO 2.000000000 sec

==== CHANNEL f1 =====  
 NUC1 1H  
 P1 14.70 usec  
 PL1 0.00 dB  
 SFO1 399.9528000 MHz

F2 - Processing parameters  
 SF 399.9500000 MHz  
 SH 32768  
 WDW EM  
 SSB 0  
 LB 0.70 Hz  
 GB 0  
 PC 1.00

Ketal

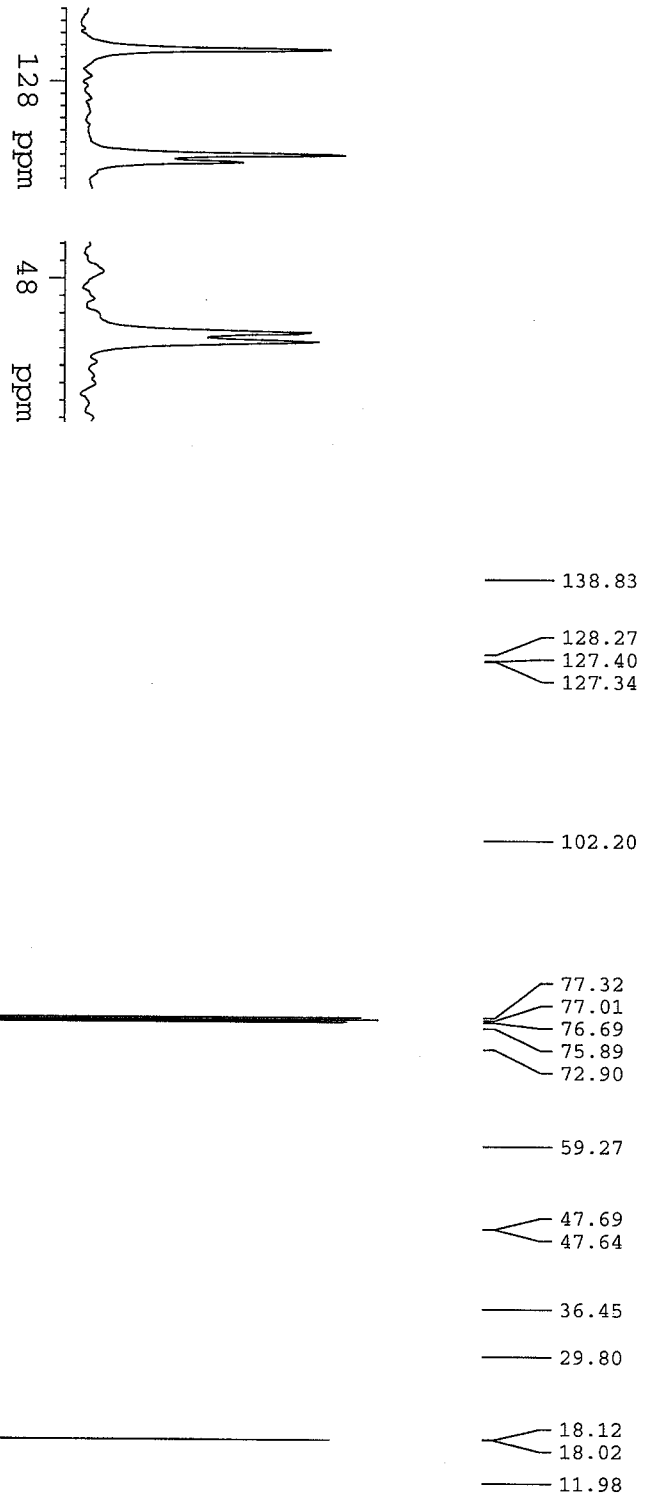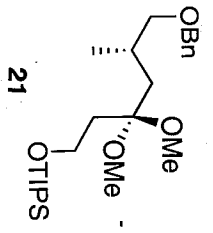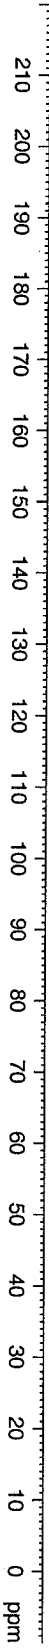

Current Data Parameters  
 NAME: SUM-111-79-Ketal  
 EXPNO: 4  
 PROCNO: 1  
 DU: /h  
 USER: subham

F2 - Acquisition Parameters  
 Date\_: 20090602  
 Time: 15.42  
 INSTRUM: DPX400  
 PROBHD: 5 mm BBO BB-1H  
 PULPROG: zgpg30  
 TD: 65536  
 SOLVENT: NS  
 DS: 4  
 SWH: 25125.629 Hz  
 FIDRES: 0.383387 Hz  
 AQ: 1.3042164 s  
 RG: 16384  
 DW: 19.900 us  
 DE: 6.00 us  
 TE: 302.2 K  
 D1: 0.15000001 s  
 d11: 0.03000000 s  
 DELTA: 0.05000000 s  
 TD0: 1

==== CHANNEL F1 =====  
 NUC1: 13C  
 P1: 7.80 us  
 PL1: -3.80 dB  
 SFO1: 100.578580 MHz

==== CHANNEL F2 =====  
 CPDPRG2: waltz16  
 NUC2: 1H  
 PCPD2: 135.00 us  
 PL2: 17.40 dB  
 PL12: 17.40 dB  
 PL13: 17.40 dB  
 SFO2: 399.9516000 MHz

F2 - Processing parameters  
 SI: 32768  
 SF: 100.5675080 MHz  
 WDW: EM  
 SSB: 0  
 LB: 3.00 Hz  
 GB: 0  
 PC: 1.40

# Alcohol

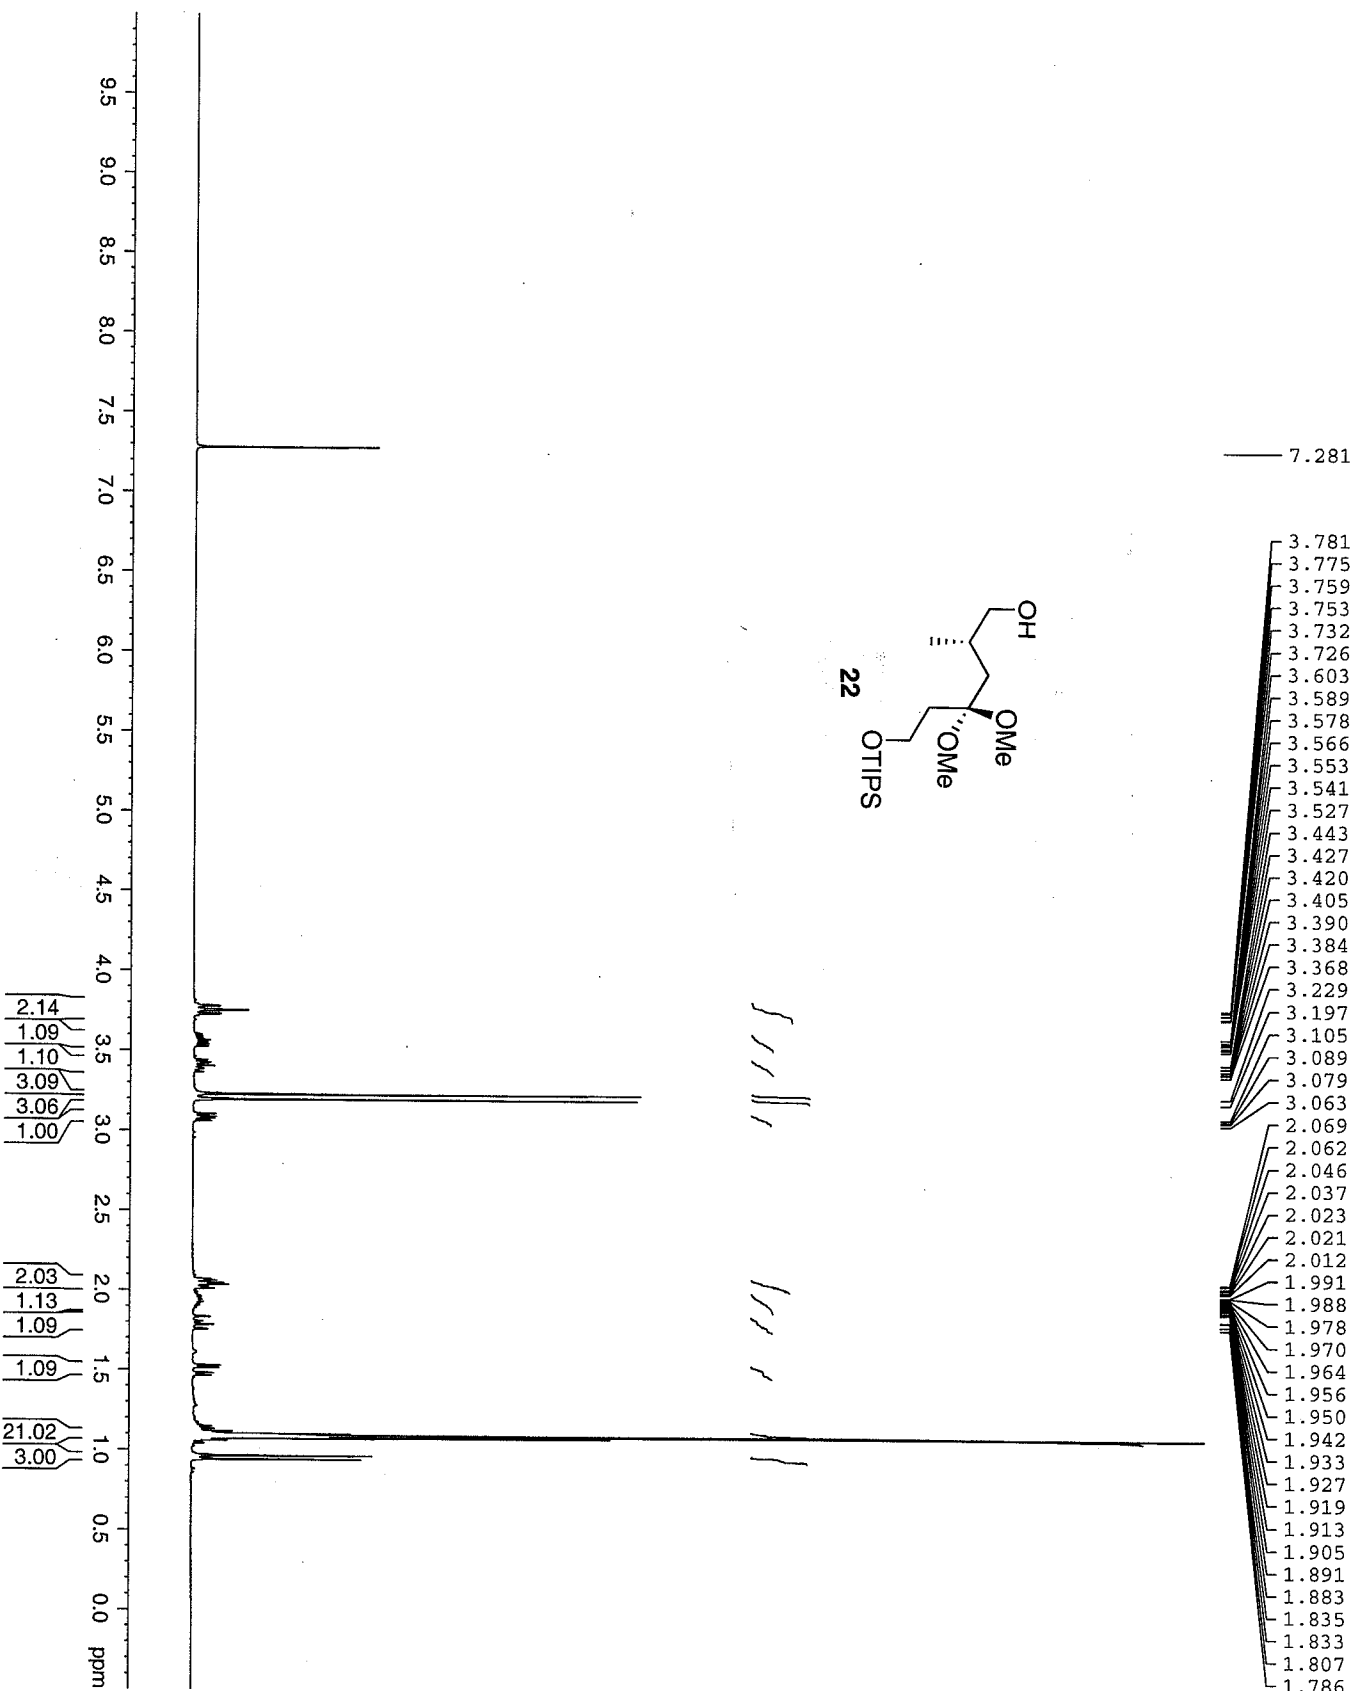

7.281

3.781

3.775

3.759

3.753

3.732

3.726

3.603

3.589

3.578

3.566

3.553

3.541

3.527

3.443

3.427

3.420

3.405

3.390

3.384

3.368

3.329

3.197

3.105

3.089

3.079

3.063

2.069

2.062

2.046

2.037

2.023

2.021

2.012

1.991

1.988

1.978

1.970

1.964

1.956

1.950

1.942

1.933

1.927

1.919

1.913

1.905

1.891

1.883

1.835

1.833

1.807

1.786

Current Data Parameters

NAME SDA-111-81-Alc

EXPNO 9

PROCNO 1

DI 1

USER subham

F2 - Acquisition Parameters

Date\_ 20090603

Time 17.42

INSTRUM DEK300

PROBHD 5 mm QNP 1H/1

PULPROG zg30

TD 32768

SOLVENTP CDCl3

NS 32

DS 2

SWH 4789.272

FIDRES 0.146157

AQ 3.4210291

RG 322.5

DW 104.400

DE 6.00

TE 303.2

D1 2.00000000

TD0 1

==== CHANNEL f1 ===

NUC1 1H

P1 9.00

PL1 -3.00

SFO1 300.1321009

F2 - Processing parameters

SI 32768

SF 300.1300000

WDW EM

SSB 0

LB 0.30

GB 0

PC 21.00

Alcohol

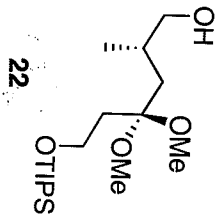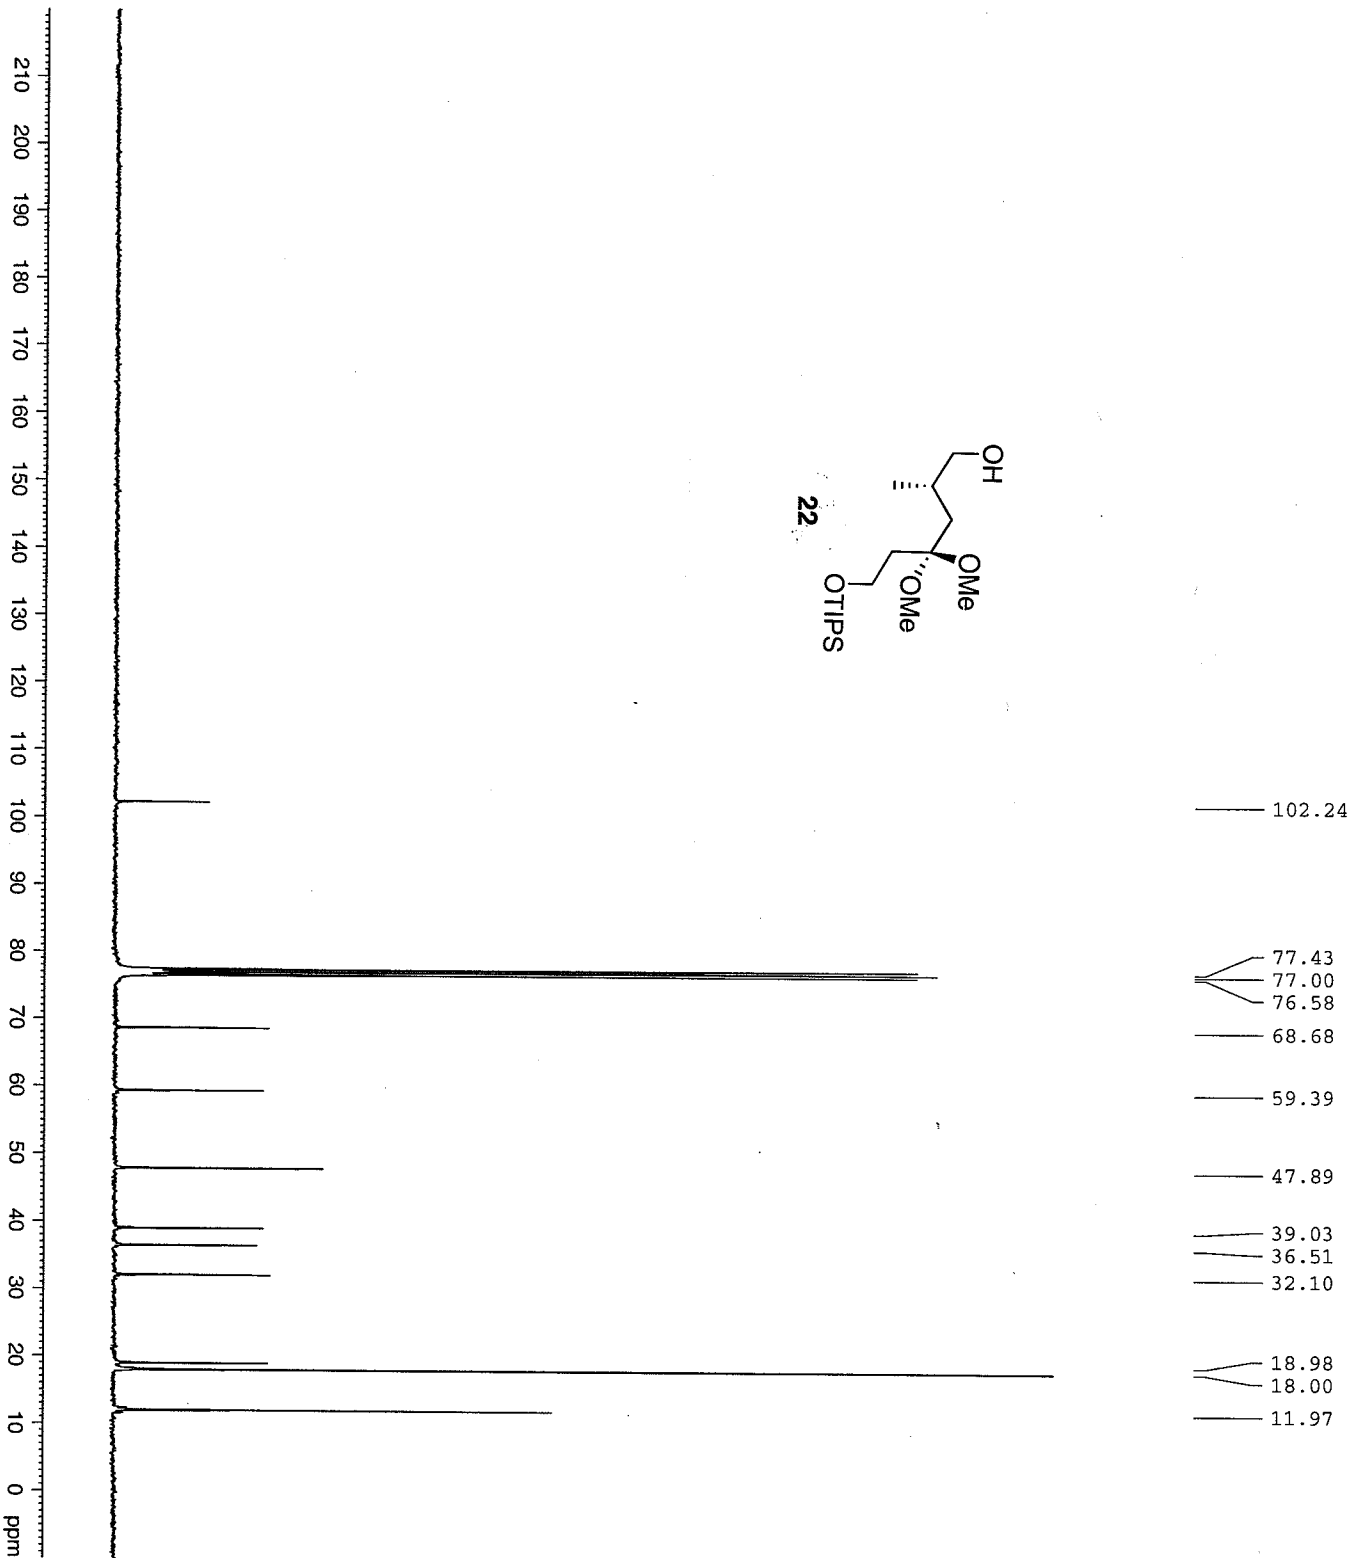

Current Data Parameters  
 NAME SUW-III-81-Alcohol  
 EXPNO 12  
 PROCNO 1  
 DU /h  
 USER subham

F2 - Acquisition Parameters  
 Date\_ 20090603  
 Time 23.10  
 INSTRUM DFX300  
 PROBHD 5 mm QNP 1H/1  
 PULPROG zgpg30  
 TD 65536  
 SOLVENT CDCl3  
 NS 17353  
 DS 4

SMF 18932.393 Hz  
 FIDRES 0.267360 Hz  
 AQ 1.7400308 sec  
 RG 374.7  
 DW 26.350 usec  
 DE 6.00 usec  
 TE 301.2 K  
 D1 0.15000001 sec  
 D11 0.03000000 sec  
 DELTA 0.05000000 sec  
 TDO 1

==== CHANNEL F1 =====  
 NUC1 13C  
 P1 8.80 usec  
 PL1 -3.00 dB  
 SFO1 75.4760505 MHz

==== CHANNEL F2 =====  
 CPDPRG2 waltz16  
 NUC2 1H  
 PCPD2 80.00 usec  
 PL2 -3.00 dB  
 PL12 17.55 dB  
 PL13 17.55 dB  
 SFO2 300.1312005 MHz

F2 - Processing parameters  
 SI 32768  
 SF 75.4677490 MHz  
 MDW EM  
 SSB 0  
 LB 3.00 Hz  
 GB 0  
 PC 1.40

Sulfide

7.361  
7.342  
7.300  
7.286  
7.262  
7.181  
7.164  
7.146

3.759  
3.739  
3.734  
3.716  
3.696  
3.679  
3.673  
3.654  
3.178  
3.171  
3.138  
3.125  
2.784  
2.764  
2.752  
2.732  
1.996  
1.980  
1.966  
1.948  
1.929  
1.815  
1.801  
1.778  
1.764  
1.563  
1.545  
1.526  
1.508  
1.144  
1.128  
1.110  
1.097  
1.093  
1.088  
1.075  
1.063  
1.054

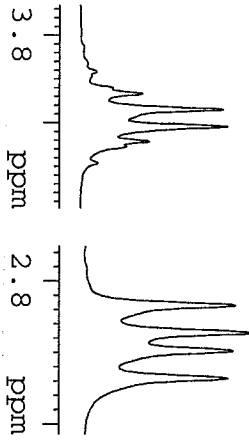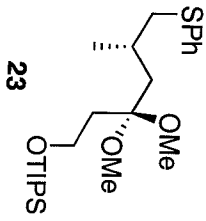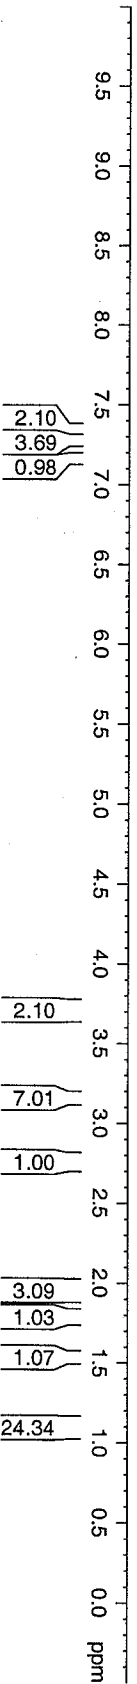

Current Data Parameters  
NAME SUM-117-82-S11  
EXPNO 1  
PROCNO 1  
DU /h  
USER subham

F2 - Acquisition Parameters  
Date\_ 20090605  
Time 12.39  
INSTRUM DFX400  
PROBHD 5 mm BBO BH-1H  
PULPROG zg30  
TD 32768  
SOLVENT CDCl3  
NS 32  
DS 2  
SWH 6410.256  
FIDRES 0.195625  
AQ 2.5559540  
RG 362  
DW 78.000  
DE 6.00  
TE 298.2  
D1 2.00000000  
TD0 1

==== CHANNEL f1 ===  
NUC1 1H  
P1 14.70  
PL1 0.00  
SFO1 399.9528000

F2 - Processing parameters  
SI 32768  
SF 399.9500000  
WDW EM  
SSB 0  
LB 0.70  
GB 0  
PC 201.00

Sulfide

Current Data Parameters

NAME SUM-T11-82-Sulfidic  
 EXPNO 2  
 PROCNO 1  
 DU /n  
 USER subham

F2 - Acquisition Parameters

Date\_ 20090605  
 Time 12.47  
 INSTRUM DPK400  
 PROBHD 5 mm BBO BB-1H  
 PULPROG zgpg30  
 TD 65536  
 SOLVENT  
 NS 3122  
 DS 4  
 SWH 25125.629 Hz  
 FIDRES 0.383387 Hz  
 AQ 1.3042164 s  
 RG 16384  
 DW 19.900 us  
 TE 299.2 K  
 DE 6.00 us  
 D1 0.15000001 s  
 d11 0.03000000 s  
 DELTA 0.05000000 s  
 TD0 1

CHANNEL F1

NUC1 13C  
 P1 7.80 us  
 PL1 -3.80 dB  
 SFO1 100.5785280 MHz

CHANNEL F2

CEPPRG2 waltz16  
 NUC2 1H  
 PCPD2 135.00 us  
 PL2 17.40 dB  
 PL12 17.40 dB  
 PL13 17.40 dB  
 SFO2 399.9516000 MHz

F2 - Processing parameters

SI 32768  
 SF 100.5675080 MHz  
 WDW EM  
 SSB 0  
 LB 3.00 Hz  
 GB 0  
 PC 1.40

- 137.37
- 128.81
- 128.71
- 125.56
- 102.07
- 77.33
- 77.01
- 76.70
- 59.26
- 47.72
- 41.48
- 39.13
- 36.47
- 29.66
- 20.42
- 18.02
- 11.94

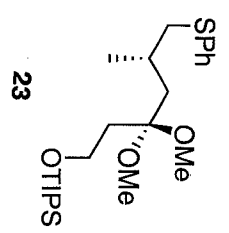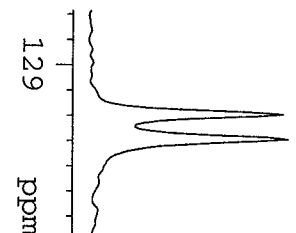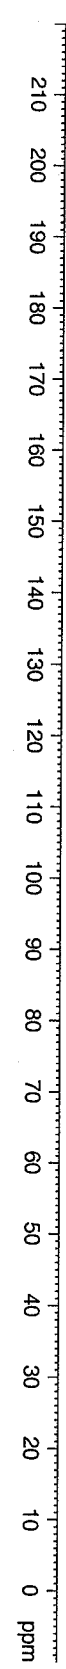

Sulfone

|       |
|-------|
| 7.944 |
| 7.926 |
| 7.922 |
| 7.671 |
| 7.658 |
| 7.653 |
| 7.647 |
| 7.637 |
| 7.634 |
| 7.594 |
| 7.574 |
| 7.560 |
| 7.556 |
| 7.285 |
| 3.754 |
| 3.748 |
| 3.718 |
| 3.712 |
| 3.679 |
| 3.665 |
| 3.655 |
| 3.641 |
| 3.634 |
| 3.625 |
| 3.620 |
| 3.608 |
| 3.605 |
| 3.588 |
| 3.583 |
| 3.580 |
| 3.563 |
| 3.089 |
| 3.041 |
| 2.879 |
| 2.856 |
| 2.843 |
| 2.820 |
| 2.201 |
| 2.195 |
| 2.189 |
| 2.184 |
| 2.178 |
| 2.172 |
| 2.167 |
| 2.161 |
| 2.155 |
| 1.822 |
| 1.807 |
| 1.804 |
| 1.788 |
| 1.771 |
| 1.768 |
| 1.752 |
| 1.739 |
| 1.716 |
| 1.702 |
| 1.679 |
| 1.525 |
| 1.508 |
| 1.504 |
| 1.488 |
| 1.477 |
| 1.472 |
| 1.467 |
| 1.452 |
| 1.440 |
| 1.429 |
| 1.190 |
| 1.173 |
| 1.089 |
| 1.078 |
| 1.069 |
| 1.060 |
| 1.048 |

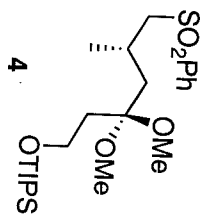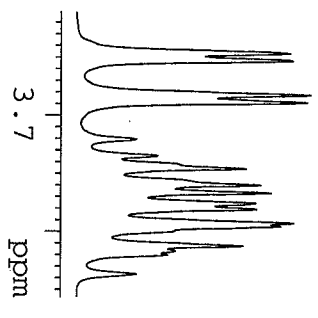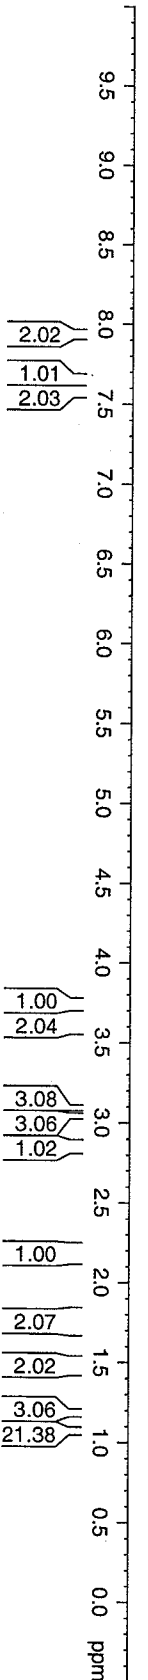

Current Data Parameters  
 NAME SUM-TIT-71-SU1  
 EXNO 5  
 PROCNO 1  
 F2 - Acquisition Parameters  
 Date\_ 20090526  
 Time 20.11  
 INSTRUM DPK400  
 PROBHD 5 mm BBO BS-1H  
 PULPROG zg30  
 TD 32768  
 SOLVENT CDCl3  
 NS 32  
 DS 2  
 SWH 6410.256  
 FIDRES 0.195625  
 AQ 2.5559540  
 RG 128  
 LW 78.000  
 DE 6.00  
 TE 298.2  
 D1 2.00000000  
 TD0 1  
 ===== CHANNEL f1 =====  
 NUCL1 1H  
 P1 14.70  
 PL1 0.00  
 SFO1 399.9528000  
 F2 - Processing Parameters  
 SI 32768  
 SF 399.9500000  
 WDW EM  
 SSB 0  
 LB 0.70  
 GB 0  
 PC 0  
 03  
 01.00

Sulfone

- 139.96
- 133.42
- 129.16
- 128.02
- 101.74
- 77.34
- 77.03
- 76.71
- 61.43
- 59.16
- 47.63
- 39.94
- 36.13
- 25.35
- 21.49
- 18.03
- 11.93

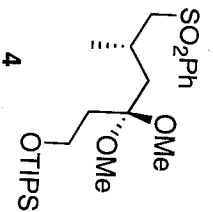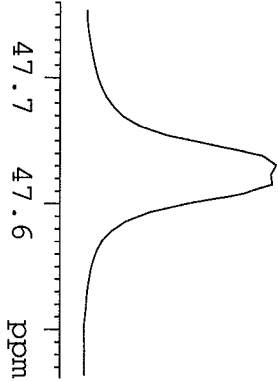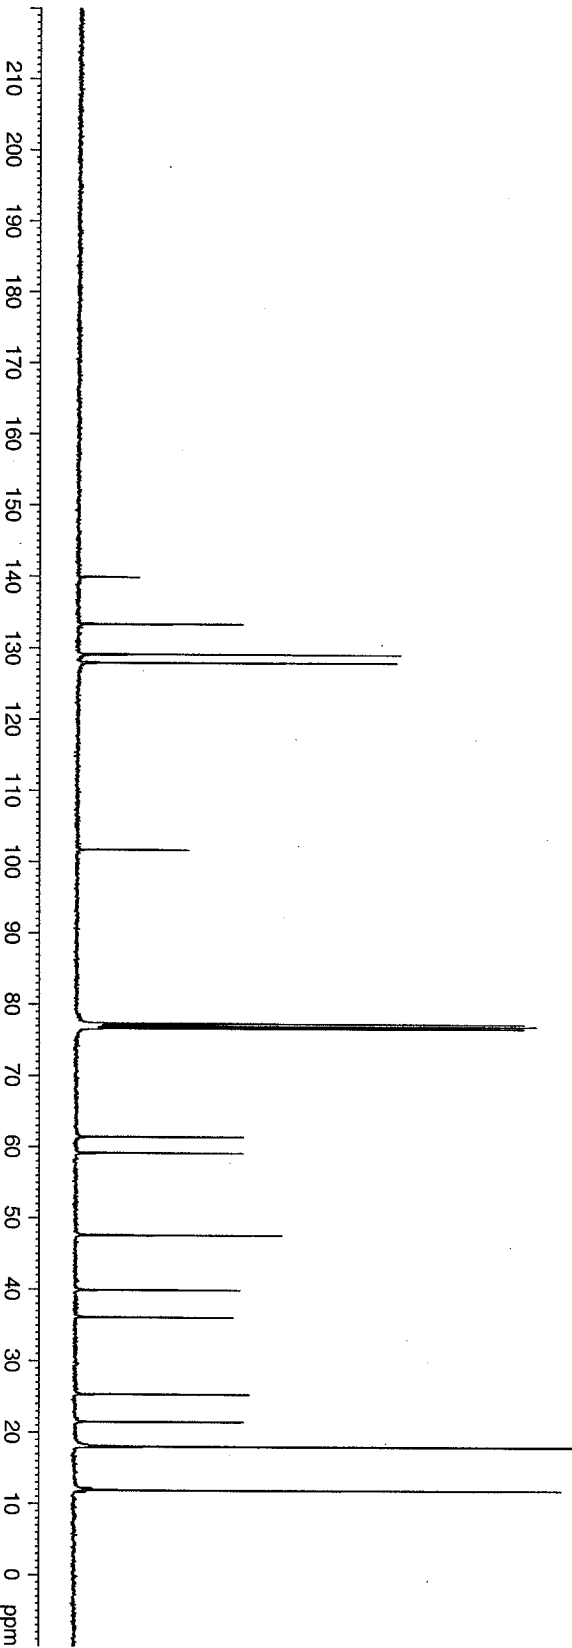

Current Data Parameters  
 NAME SUM-III-71-Sulfor  
 EXPNO 7  
 PROCNO 1  
 DU /h  
 USER subham

F2 - Acquisition Parameters  
 Date\_ 20090526  
 Time 20.36  
 INSTRUM DPX400  
 PROBHD 5 mm BBO BB-1H  
 PULPROG zgpg30  
 TD 65536  
 SOLVENT  
 NS 4900  
 DS 4  
 SWH 25125.629 Hz  
 FIDRES 0.383387 Hz  
 AQ 1.3042164 s  
 RG 16384  
 DW 19.900 us  
 DE 6.00 us  
 TE 298.2 K  
 D1 0.15000001 s  
 d11 0.03000000 s  
 DELTA 0.05000000 s  
 TD0 1

==== CHANNEL f1 =====  
 NUC1 13C  
 P1 7.80 us  
 PL1 -3000 dB  
 SFO1 100.5785890 MHz

==== CHANNEL f2 =====  
 CPDPRG2 waltz16  
 NUC2 1H  
 PCPD2 135.00 us  
 PL2 17.40 dB  
 PL12 17.40 dB  
 PL13 17.40 dB  
 SFO2 399.9516000 MHz

F2 - Processing parameters:  
 SI 32768  
 SF 100.5675080 MHz  
 WDW EM  
 SSB 0  
 LB 3.00 Hz  
 GB 0  
 PC 1.40







Ketone

7.285  
5.579  
5.462  
4.985  
4.604  
4.596  
4.576  
4.567  
4.302  
4.297  
4.293  
4.288  
4.276  
3.827  
3.800  
3.772  
3.735  
3.728  
3.717  
3.710  
3.699  
3.691  
3.659  
3.650  
3.632  
3.623  
3.411  
3.356  
3.142  
3.083  
2.693  
2.677  
2.665  
2.648  
2.638  
2.629  
2.616  
2.583  
2.448  
2.439  
2.431  
2.422  
2.260  
2.238  
2.224  
2.201  
1.941  
1.922  
1.904  
1.785  
1.783  
1.453  
1.443  
1.432  
1.417  
1.407  
1.389  
1.143  
1.130  
1.120  
1.107  
1.091  
1.082  
1.071  
1.061  
1.022  
1.005  
0.905  
0.112  
0.062

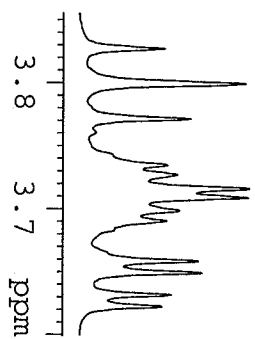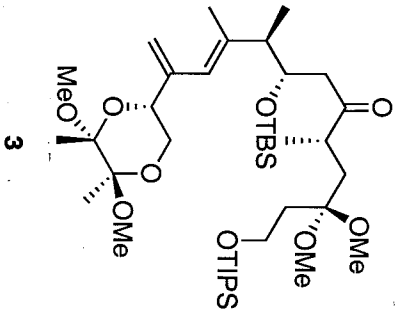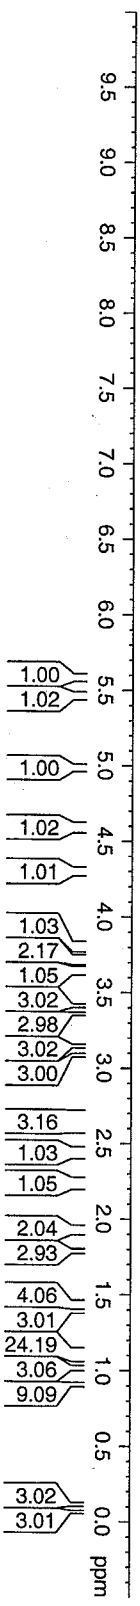

```

Current Data Parameters
NAME      SUN-III-77-Ketone
EXPNO    5
PROCNO   1
PROC     /h
F2 - Acquisition Parameters
Date_    20090619
Time     17.27
INSTRUM  DPX400
PROBHD   5 mm BBO BB-1H
PULPROG  zg30
TD       32768
SOLVENT  CDCl3
NS       64
DS       2
SWH      6410.256 Hz
FIDRES   0.195625 Hz
AQ       2.559549 sec
RG       322.5
FM       78.000 usec
DE       6.00 usec
TE       293.2 K
DLO      2.00000000 sec
FDO      1
===== CHANNEL f1 =====
NUC1     1H
P1       14.70 usec
PL1     0.00 dB
SFO1    399.9528000 MHz
F2 - Processing parameters
SI       32768
SF       399.9500000 MHz
WDW      EM
SSB      0
LB       0.70 Hz
GB       0
PC       1.00
  
```

Ketone

- 212.09
- 142.82
- 142.39
- 123.80
- 114.84
- 101.53
- 100.97
- 100.12
- 77.33
- 77.01
- 76.70
- 73.67
- 70.14
- 65.74
- 59.30
- 48.62
- 48.29
- 48.02
- 47.96
- 47.41
- 46.73
- 41.90
- 36.72
- 25.87
- 18.34
- 18.25
- 18.03
- 17.13
- 14.75
- 11.96
- 4.54
- 4.91

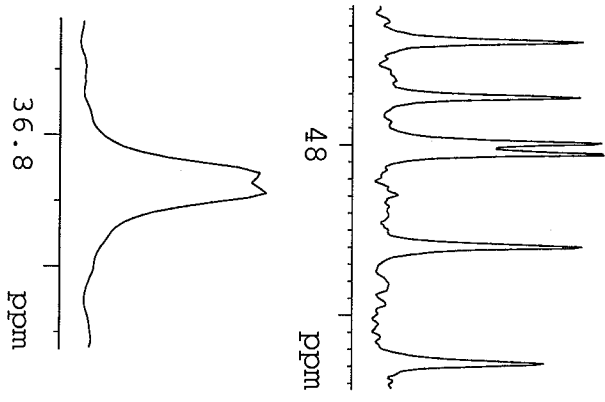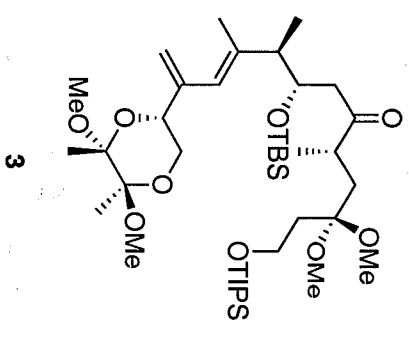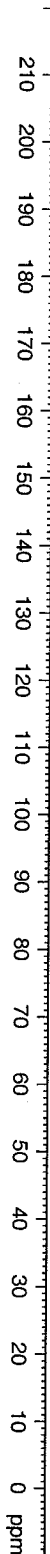

Current Data Parameters  
 NAME SDM-III-77-Ketone  
 EXNO 6  
 PROCNO 1  
 DU /n  
 USBR subham

F2 - Acquisition Parameters  
 Date\_ 20090619  
 Time 18.20  
 INSTRUM DPX400  
 PROBDH 5 mm BBO BB-1H  
 PULPROG zgpg30  
 TD 65536  
 SOLVENT NS  
 DS 13187  
 SFR 25125.629 Hz  
 FIDRES 0.383387 Hz  
 AQ 1.3042164 sec  
 RG 16384  
 DW 19.900 usec  
 DE 6.00 usec  
 TE 300.2 K  
 D1 0.15000001 sec  
 d11 0.03000000 sec  
 DELTA 0.05000000 sec  
 TDO 1

==== CHANNEL F1 =====  
 NUC1 13C  
 P1 7.80 usec  
 PL1 -3.00 dB  
 SFO1 100.5785700 MHz

==== CHANNEL F2 =====  
 CPDPRG2 waltz16  
 NUC2 1H  
 P2 135.00 usec  
 PCPD2 17.40 dB  
 PL2 17.40 dB  
 PL12 17.40 dB  
 PL13 17.40 dB  
 SFO2 399.9516000 MHz

F2 - Processing parameters  
 SI 32768  
 SF 100.5675080 MHz  
 WDW EM  
 SSB 0  
 LB 3.00 Hz  
 GB 0  
 PC 1.40

di-TBS Aldol Pdt

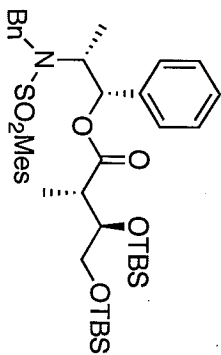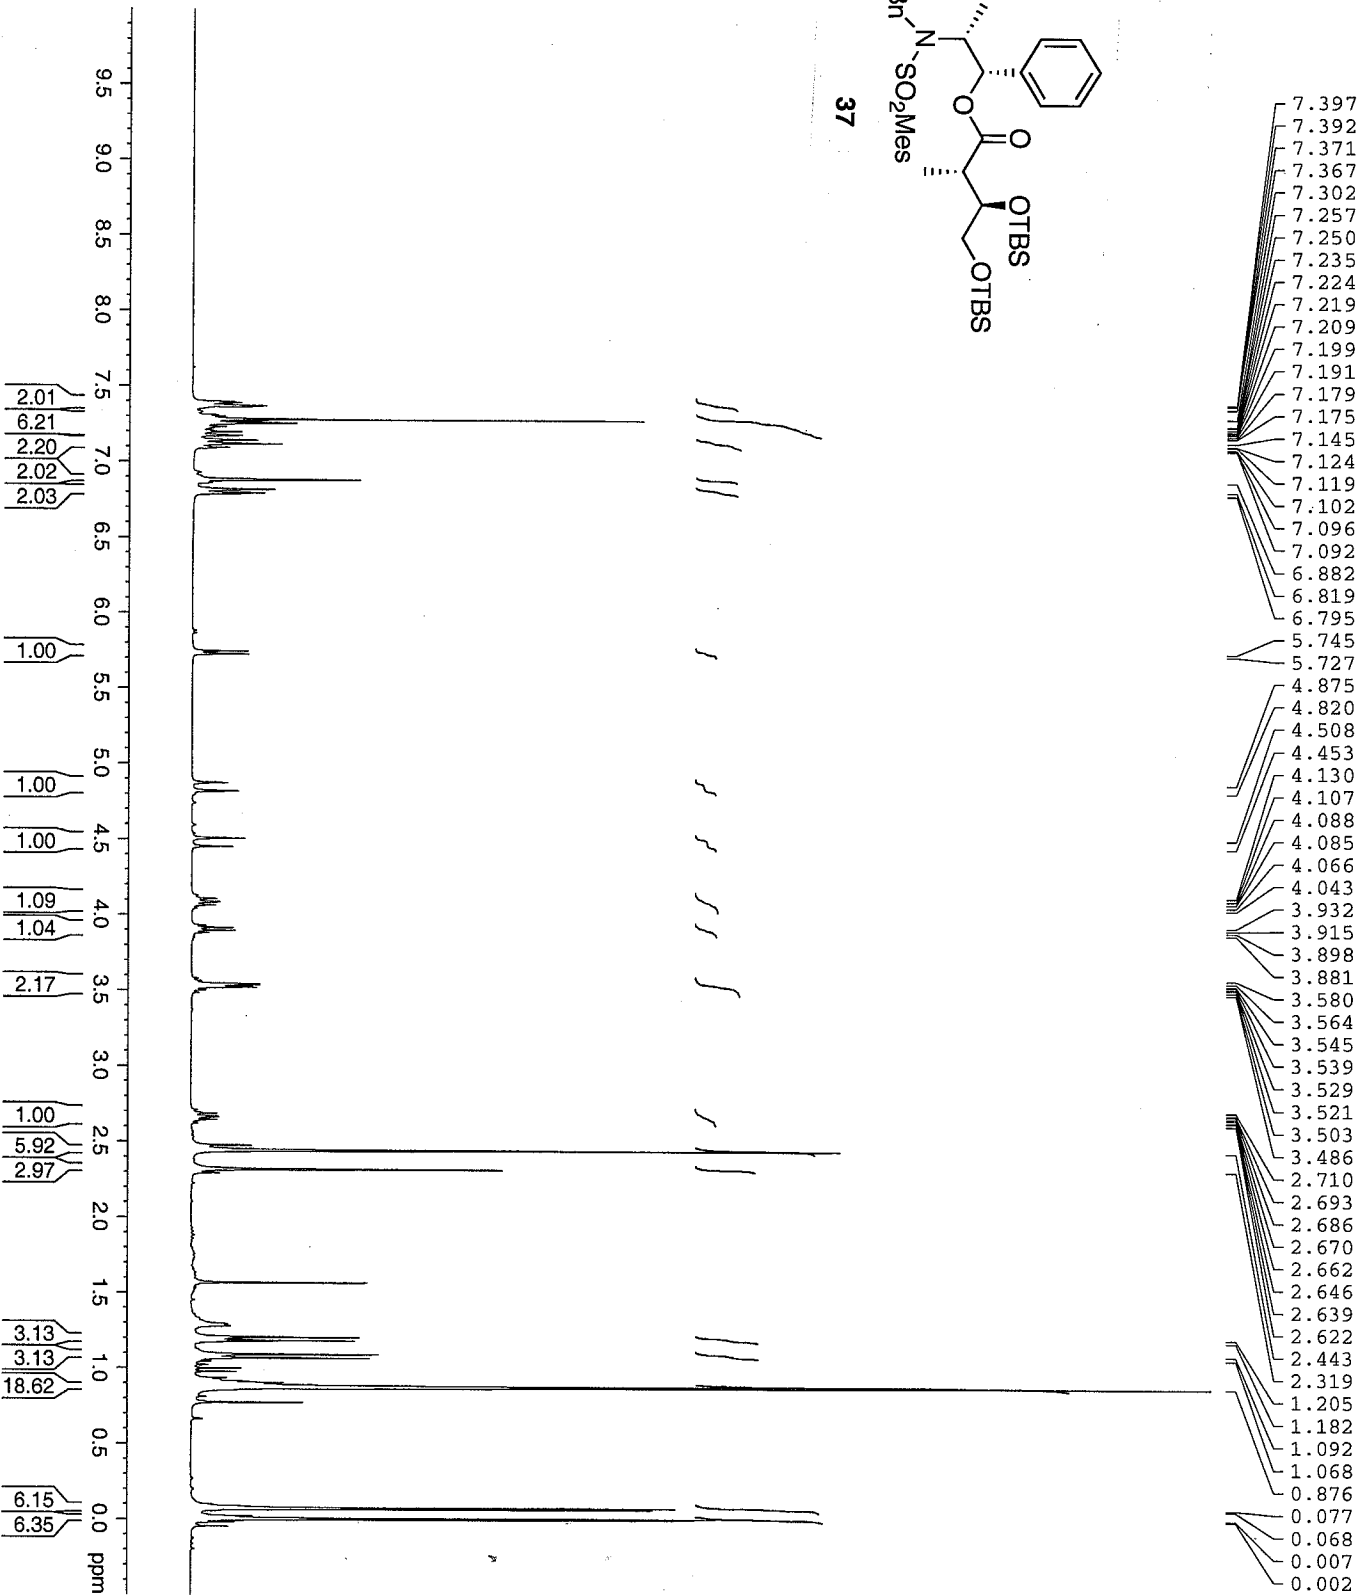

|       |
|-------|
| 7.397 |
| 7.392 |
| 7.371 |
| 7.367 |
| 7.302 |
| 7.257 |
| 7.250 |
| 7.235 |
| 7.224 |
| 7.219 |
| 7.209 |
| 7.199 |
| 7.191 |
| 7.179 |
| 7.175 |
| 7.145 |
| 7.124 |
| 7.119 |
| 7.102 |
| 7.096 |
| 7.092 |
| 6.882 |
| 6.819 |
| 6.795 |
| 5.745 |
| 5.727 |
| 4.875 |
| 4.820 |
| 4.508 |
| 4.453 |
| 4.130 |
| 4.107 |
| 4.088 |
| 4.085 |
| 4.066 |
| 4.043 |
| 3.932 |
| 3.915 |
| 3.898 |
| 3.881 |
| 3.580 |
| 3.564 |
| 3.545 |
| 3.539 |
| 3.529 |
| 3.521 |
| 3.503 |
| 3.486 |
| 2.710 |
| 2.693 |
| 2.686 |
| 2.670 |
| 2.662 |
| 2.646 |
| 2.639 |
| 2.622 |
| 2.443 |
| 2.319 |
| 1.205 |
| 1.182 |
| 1.092 |
| 1.068 |
| 0.876 |
| 0.077 |
| 0.068 |
| 0.007 |
| 0.002 |

```

Current Data Parameters
NAME      SUN-11-32-di-TBS Aldol Pd
EXPNO     4
PROCNO    1
USER       subhan

F2 - Acquisition Parameters
Date_     20081123
Time      11:11:11
INSTRUM   spect
PROBHD    5 mm QNP 1H/1
PULPROG   zg30
TD         65536
SOLVENT   CDCl3
NS         32
DS         2
SWH        4789.272 Hz
FIDRES    0.146157 Hz
AQ         3.421291 sec
RG         104.400 usec
DE         6.00 usec
TE         298.2 K
D1         2.00000000 sec
TD0        1

===== CHANNEL f1 =====
NUC1       1H
P1         9.00 usec
PL1        -3.00 dB
SFO1       300.1321009 MHz

F2 - Processing parameters
SI         32768
SF         300.1300000 MHz
WDW        EM
SSB        0
LB         0.30 Hz
GB         0
PC         1.00
    
```

di-TBS Aldol PdC

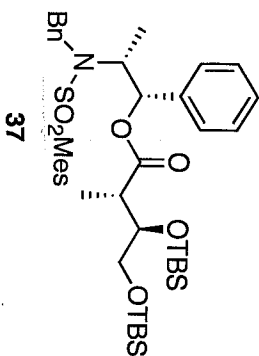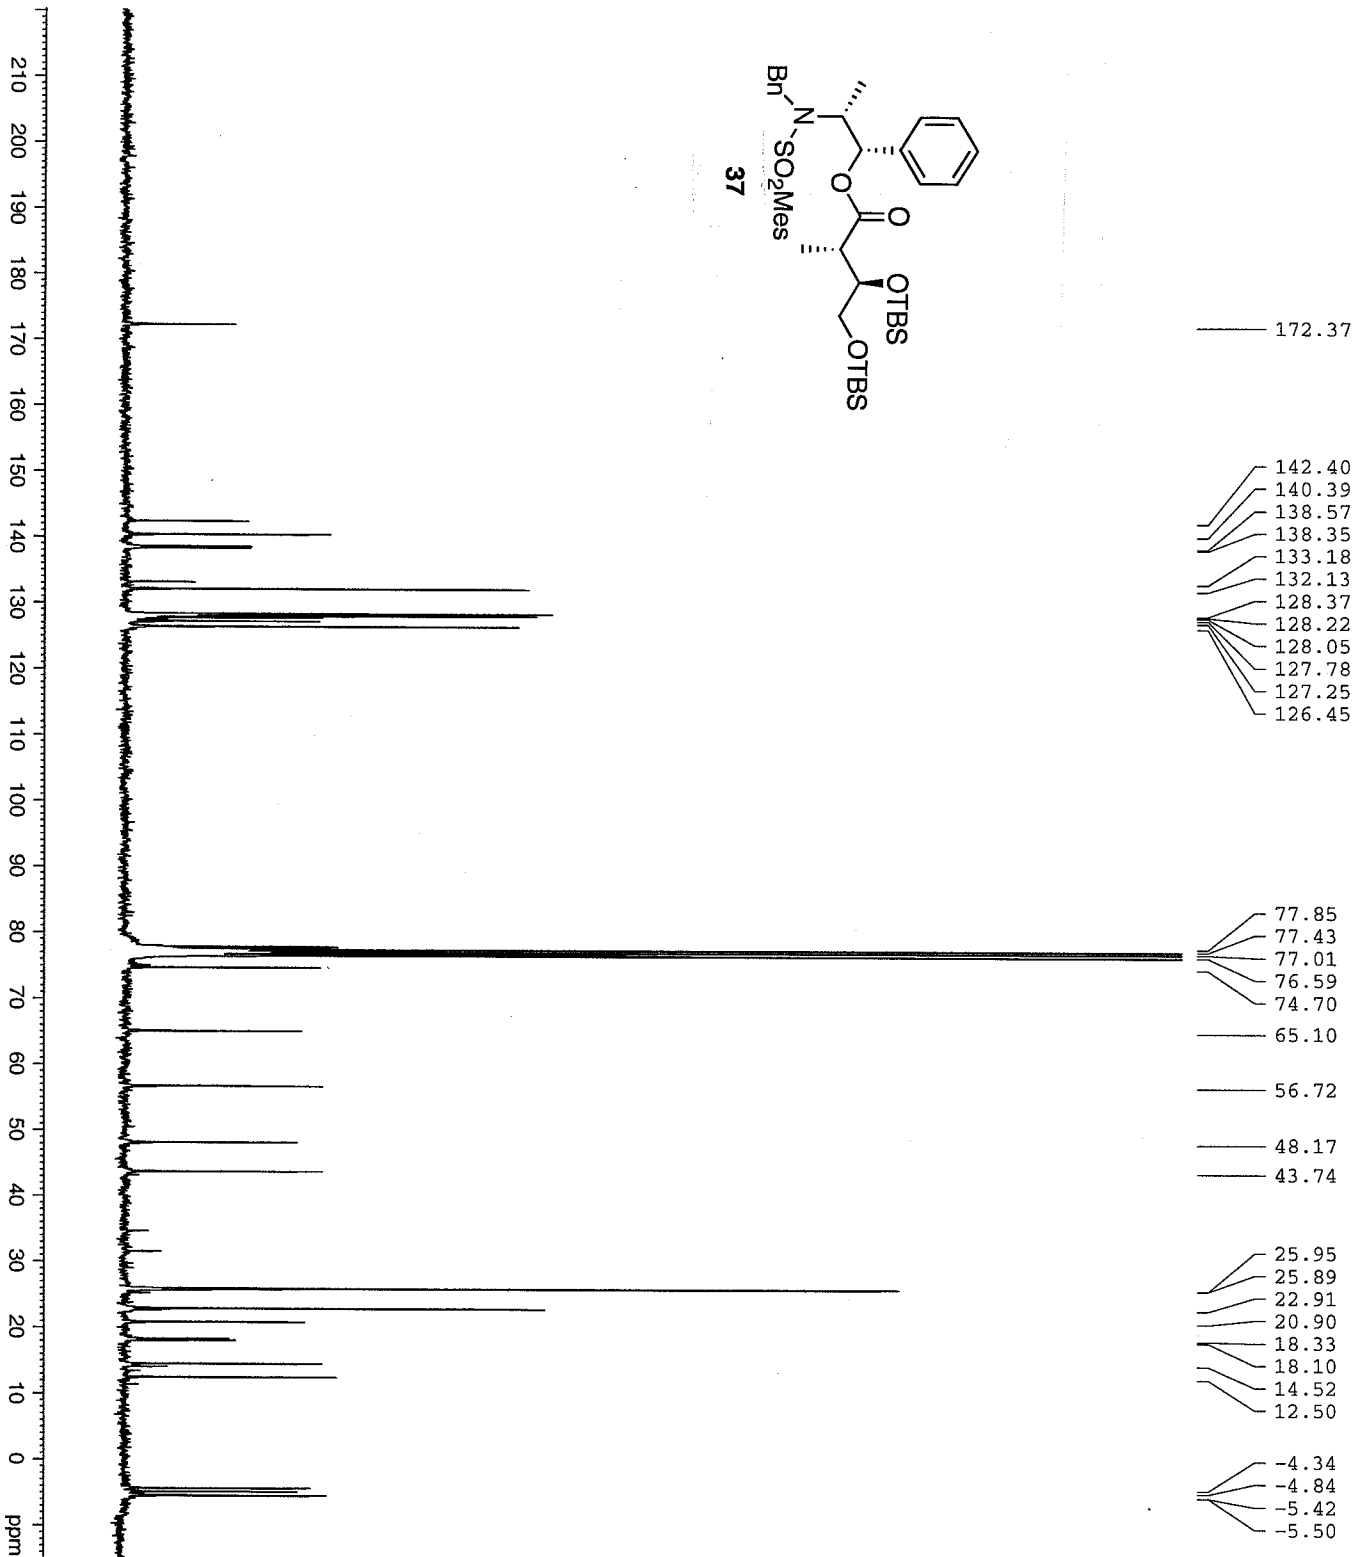

Current Data Parameters  
 NAME: SIM-II-32-di-TBS Aldol PdC  
 EXPNO: 5  
 PROCNO: 7  
 USER: subhan

F2 - Acquisition Parameters  
 Date\_: 20091123  
 Time: 08:30  
 INSTRUM: spect  
 PROBHD: 5 mm QNP 1H/1  
 PULPROG: zgpg30  
 TD: 65536  
 SOLVENT: CDCl3  
 DS: 4  
 NS: 151  
 SWH: 18832.393 Hz  
 FIDRES: 0.287360 Hz  
 AQ: 1.7400308 sec  
 RG: 327.5  
 DE: 24.516 usec  
 TE: 298.2 K  
 D1: 0.15000001 sec  
 d11: 0.03000000 sec  
 DELTA: 0.05000000 sec  
 TDS: 1

===== CHANNEL f1 =====  
 NUCL1: 13C  
 P1: 8.00 usec  
 PL1: -1.00 dB  
 SFO1: 75.4760505 MHz

===== CHANNEL f2 =====  
 CPDPRG2: waltz16  
 P2: 80.00 usec  
 PL2: -3.00 dB  
 PL12: 17.55 dB  
 PL13: 17.55 dB  
 SFO2: 300.1312005 MHz

F2 - Processing parameters  
 SI: 32768  
 SF: 75.4677490 MHz  
 WDM: EX  
 SSB: EX  
 GB: 0 Hz  
 PC: 1.40



di-TBS tri-alcohol

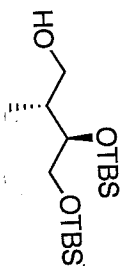

38

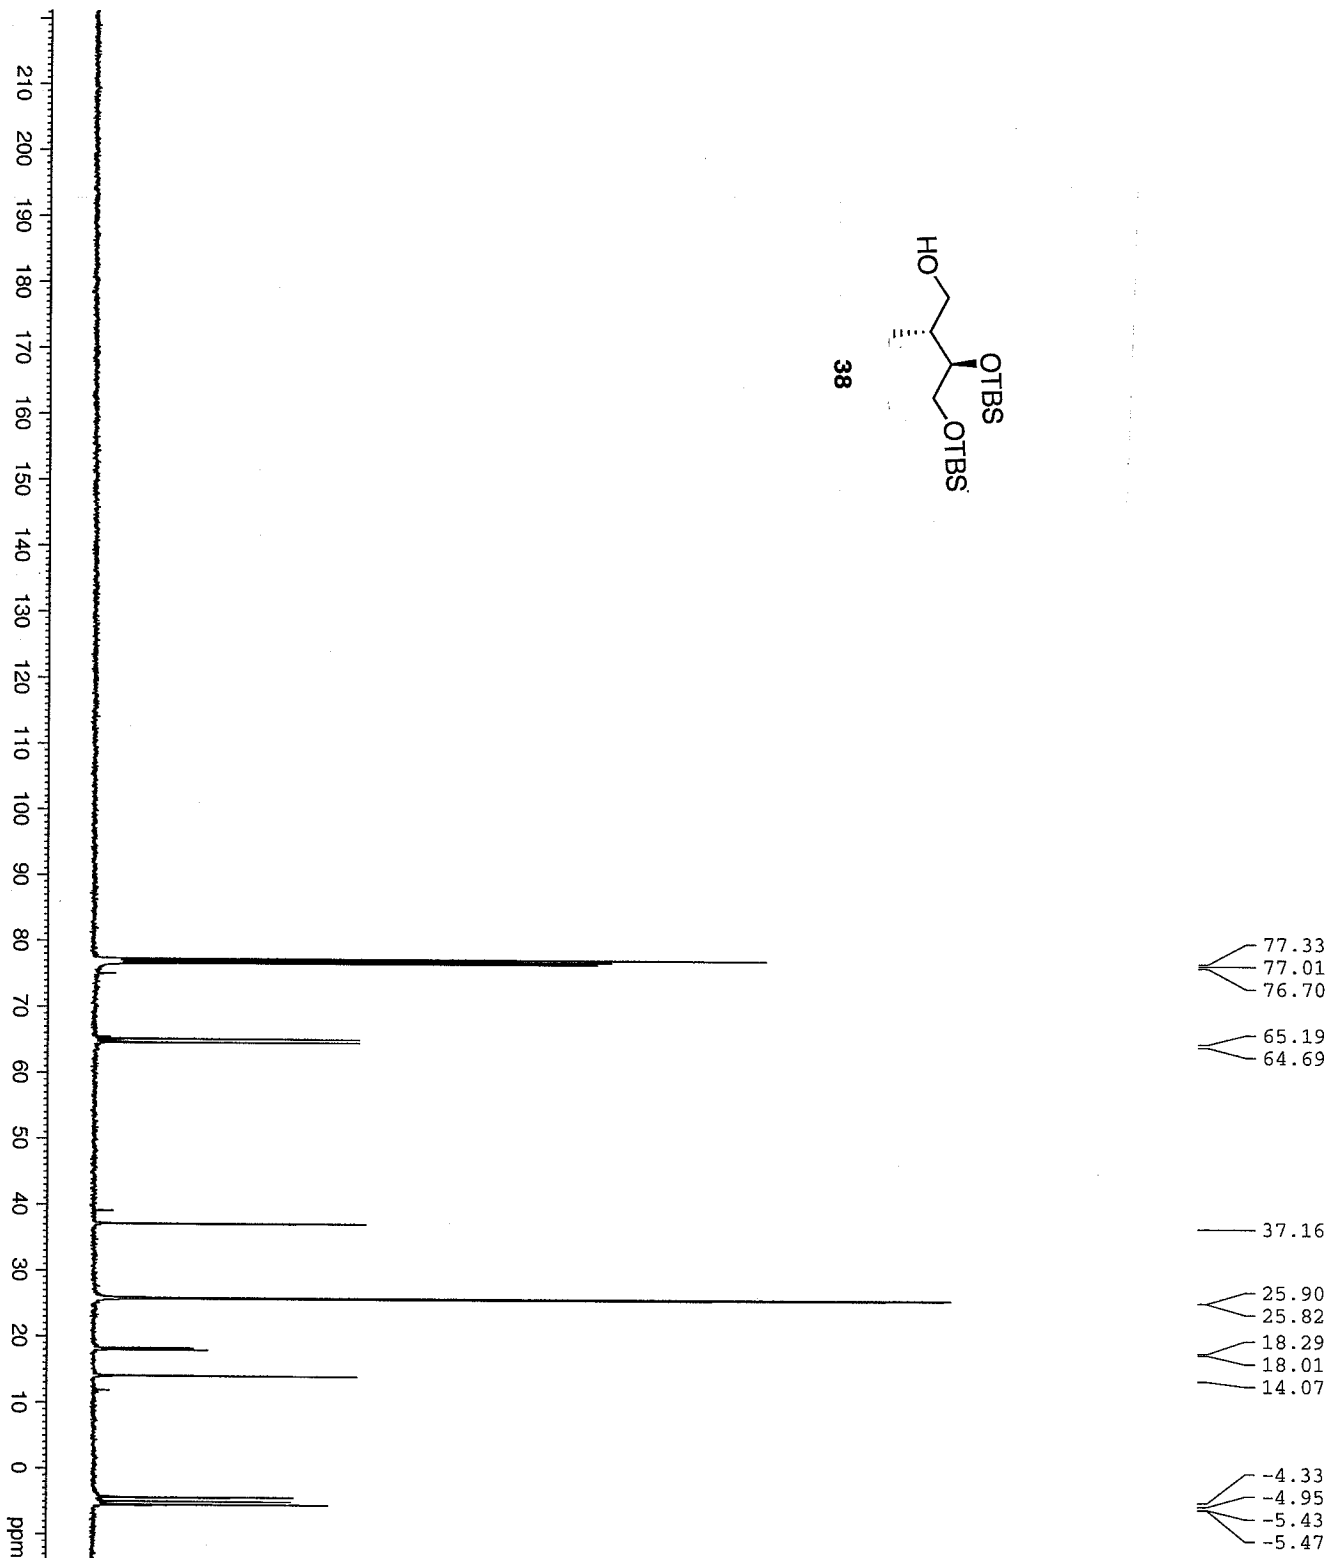

77.33  
77.01  
76.70  
65.19  
64.69  
37.16  
25.90  
25.82  
18.29  
18.01  
14.07  
4.33  
4.95  
5.43  
5.47

Current Data Parameters  
 NAME SUN-1133-di-TBS tri alcohol  
 EXNO 4  
 PROCNO 1  
 DU 1  
 USER /n  
 subnam  
 F2 - Acquisition Parameters  
 Date\_ 20080930  
 Time 23:32  
 INUM 12412  
 PROBD 5 mm BBO BB-1H  
 PULPROG zgpg30  
 TD 65536  
 SOLVENT  
 NS 4452  
 DS 4  
 SMH 25125.629 Hz  
 FIDRES 0.383387 Hz  
 AQ 1.3042184 sec  
 RG 4444  
 DW 19.900 usec  
 DE 6.00 usec  
 TE 298.2 K  
 TF 0.1500001 sec  
 d11 0.4400000 sec  
 DELTA 0.05000000 sec  
 TDO 1  
 ===== CHANNEL f1 =====  
 NUC1 13C  
 P1 7.80 usec  
 PL1 -3.00 dB  
 SF01 100.5785700 MHz  
 ===== CHANNEL f2 =====  
 CPDPRG2 waltz16  
 NUC2 1H  
 PCPD2 135.00 usec  
 PL1 17.40 dB  
 PL2 17.40 dB  
 PL3 17.40 dB  
 SF02 399.9516000 MHz  
 F2 - Processing parameters  
 SI 32768  
 SF 100.5675080 MHz  
 WDW EM  
 SSB 0  
 GB 0  
 PC 1.40



Aldehyde

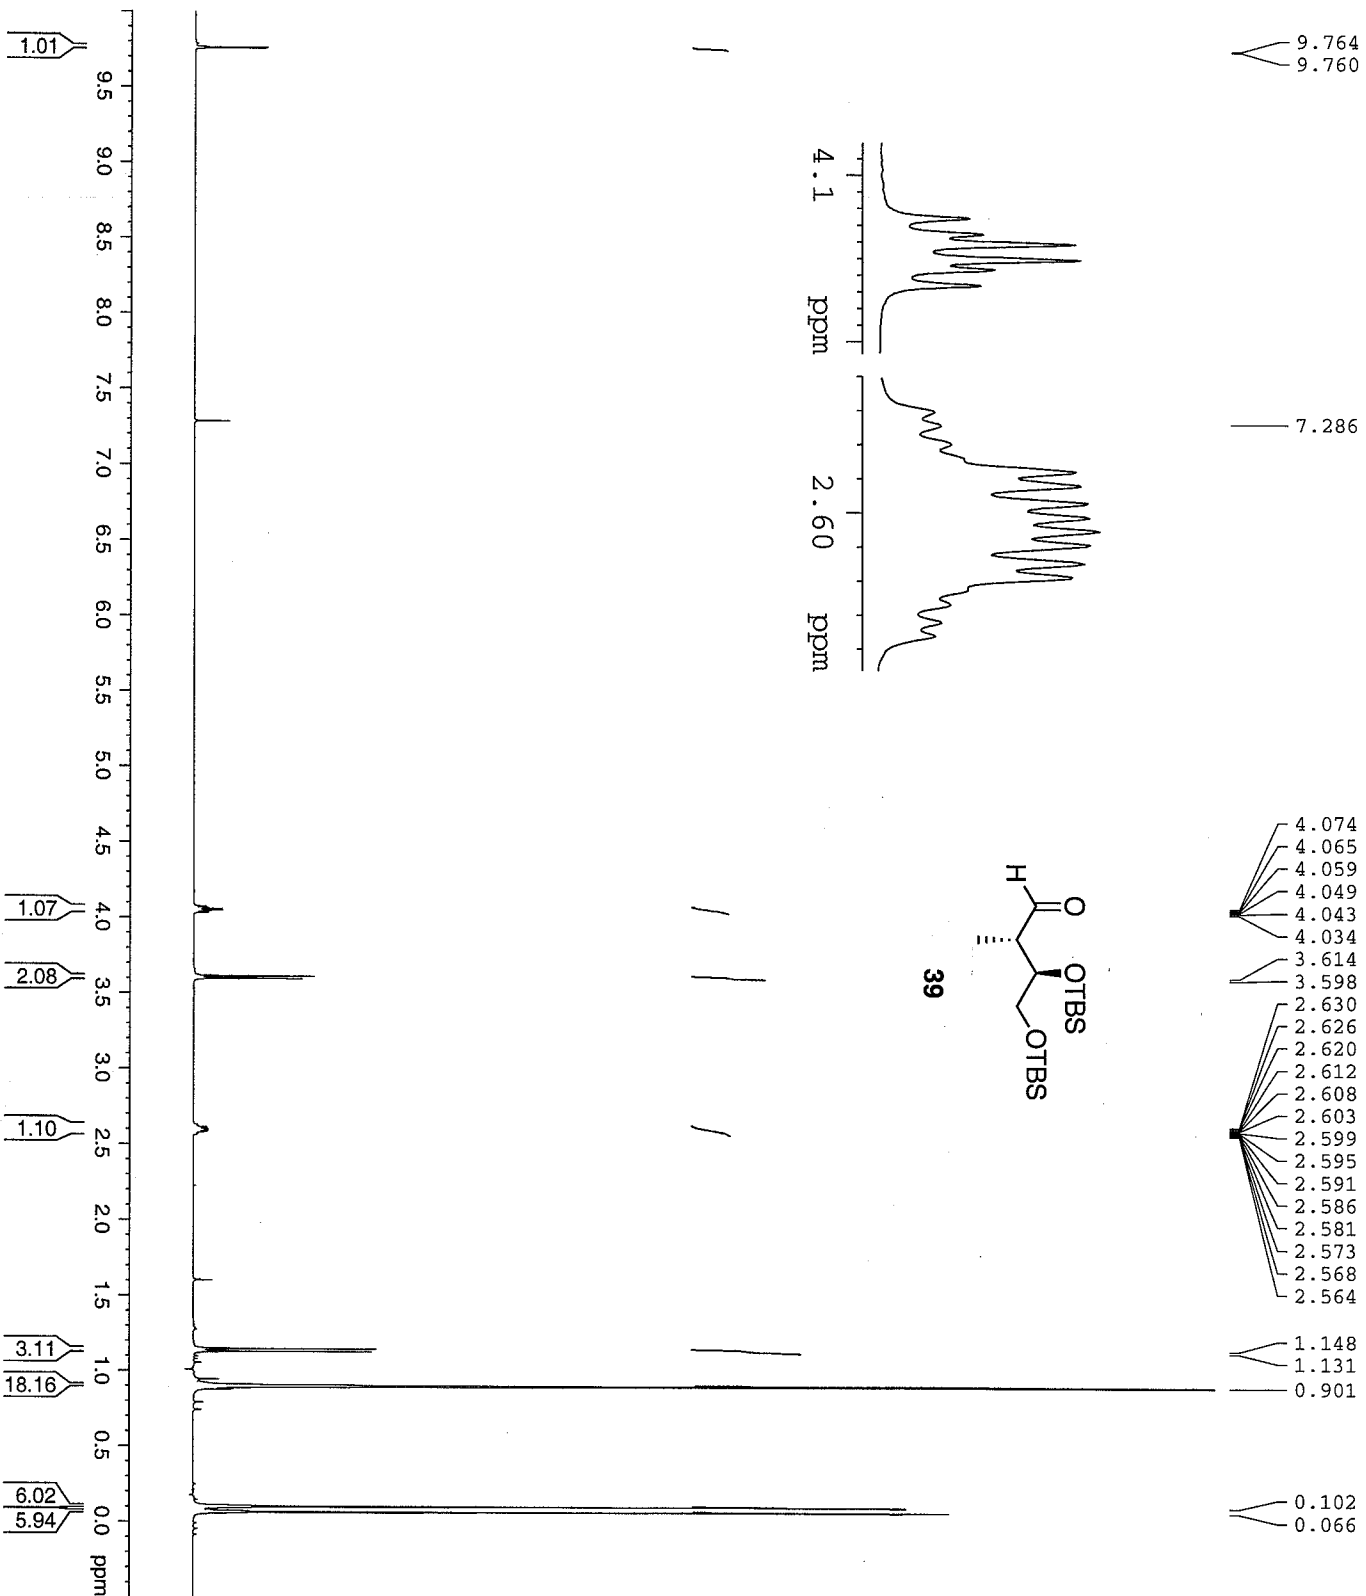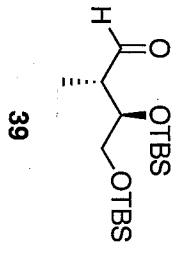

```

Current Data Parameters
NAME      SWH-II34-d1-TBS Aldehyd.c
EXPNO    1
PROCNO   1
F2 - Acquisition Parameters
Date_    20081001
Time     19.10
INSTRUM  DRX400
PROBHD   5 mm BBO BB-1H
PULPROG  zgpg30
TD        32768
SOLVENT  CDCl3
NS        32
DS        2
SWH       6410.256 Hz
F2RES     0.195623 Hz
AQ        2.5359729 sec
RG         3264
IDW        78.000 usec
DE         6.00 usec
TE         298.2 K
D1         2.00000000 sec
TPO        1

===== CHANNEL f1 =====
NUC1      13
P1        14.70 usec
PL1       0.00 dB
SFO1      399.9528000 MHz

F2 - Processing parameters
S1        32768
SF         399.9500000 MHz
WDW        EM
SSB        0
LB         0.70 Hz
GB         0
PC         1.00
    
```

Aldehyde

203.61

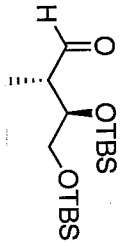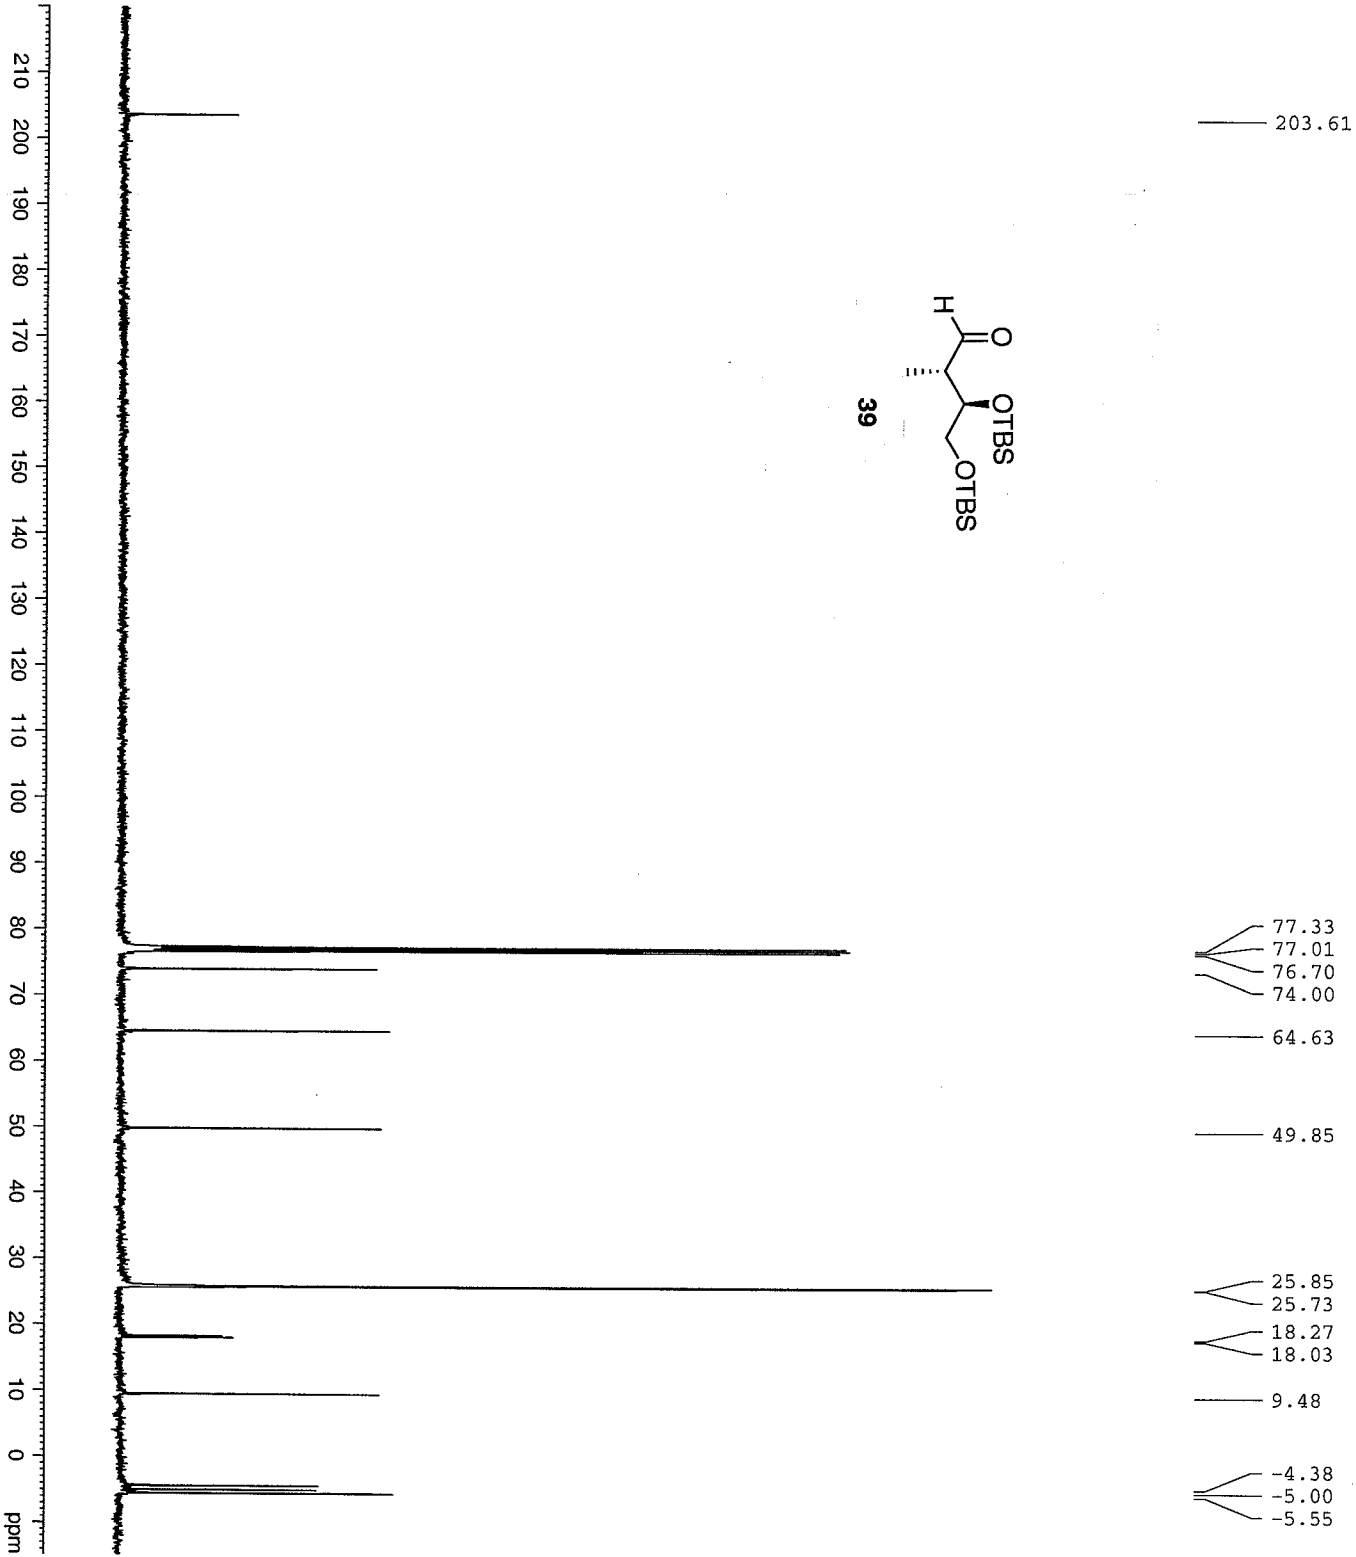

77.33  
77.01  
76.70  
74.00  
64.63  
49.85  
25.85  
25.73  
18.27  
18.03  
9.48  
4.38  
5.55

Current Data Parameters  
 NAME SUN-1134-d1-OTBS Aldehyde  
 EXNO 3  
 PROCNO 1  
 DU 3  
 USER subham  
 F2 - Acquisition Parameters  
 Date\_ 20080404  
 Time 21:32  
 INSTRUM DPX400  
 PROBD 5 mm BBO BB-1H  
 PULPROG zgpg30  
 TD 65536  
 SOLVENT  
 NS 2986  
 DS 4  
 SWH 25125.629 Hz  
 FIDRES 0.383387 Hz  
 AQ 1.3042164 sec  
 RG 16384  
 DW 19.900 usec  
 DE 28.00 usec  
 TE 29.77  
 D1 0.1500001 sec  
 d11 0.0300000 sec  
 DELTA 0.0500000 sec  
 TDO 1  
 ===== CHANNEL f1 =====  
 NUC1 13C  
 P1 7.00 usec  
 PL1 -1.00 dB  
 SFO1 100.5785700 MHz  
 ===== CHANNEL f2 =====  
 CPDPRG2 waltz16  
 NUC2 1H  
 P2 135.00 usec  
 PL2 17.40 dB  
 PL12 17.40 dB  
 PL13 17.40 dB  
 SFO2 399.9516000 MHz  
 F2 - Processing Parameters  
 SI 32768  
 SF 100.5675 MHz  
 INDY BM  
 SSB 0  
 LB 3.00 Hz  
 GB 0  
 PC 1.40

Alkyne

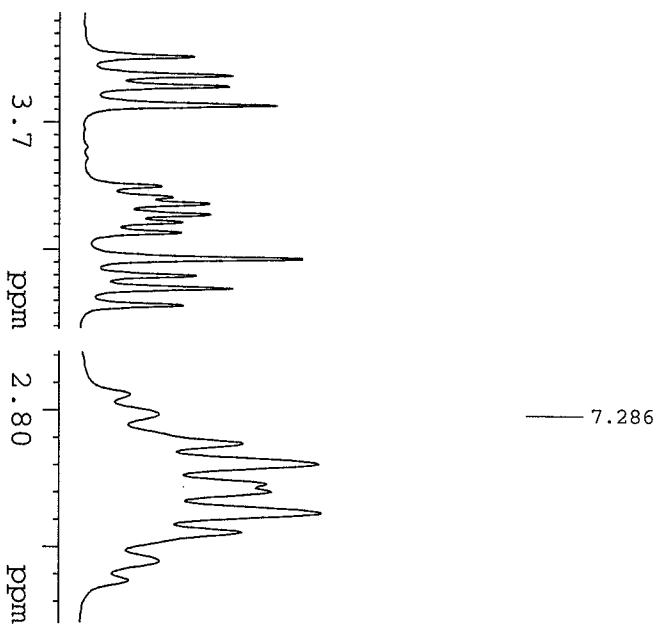

- 3.752
- 3.737
- 3.729
- 3.714
- 3.650
- 3.642
- 3.636
- 3.628
- 3.622
- 3.614
- 3.593
- 3.580
- 3.570
- 3.557
- 2.806
- 2.799
- 2.788
- 2.781
- 2.773
- 2.771
- 2.763
- 2.756
- 2.745
- 2.738
- 2.036
- 2.030
- 1.224
- 1.206
- 0.924
- 0.098
- 0.086

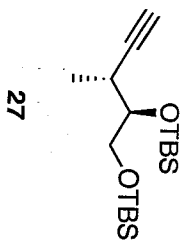

Current Data Parameters  
 NAME SIM-113-d1-MS alkyne  
 EXPNO 1  
 PROCNO 1  
 DU 1  
 USER subham

F2 - Acquisition Parameters  
 Date\_ 20081002  
 Time 19.46  
 INSTRUM DPK400  
 PROBHD 5 mm BBO HS-1H  
 PULPROG zgpg30  
 TD 32768  
 SOLVENT CDCl3  
 NS 32  
 DS 2  
 SWH 6410.236 Hz  
 FIDRES 0.195625 Hz  
 AQ 2.559540 sec  
 RG 101.6  
 DW 78.000 usec  
 DE 6.00 usec  
 TE 298.2 K  
 D1 2.0000000 sec  
 TD0 1

----- CHANNEL f1 -----  
 NUC1 1H  
 P1 14.70 usec  
 PL 0.00 dB  
 SFO1 399.9528000 MHz

F2 - Processing parameters  
 SI 32768  
 SF 399.9500000 MHz  
 WDW EM  
 SSB 0  
 GB 0  
 PC 1.00

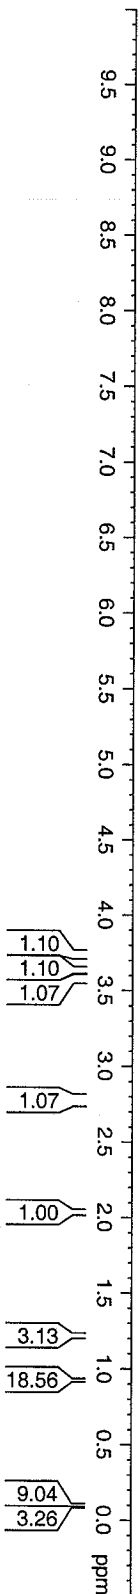

- 1.10
- 1.10
- 1.07
- 1.07
- 1.00
- 3.13
- 18.56
- 9.04
- 3.26

Alkyne

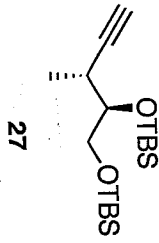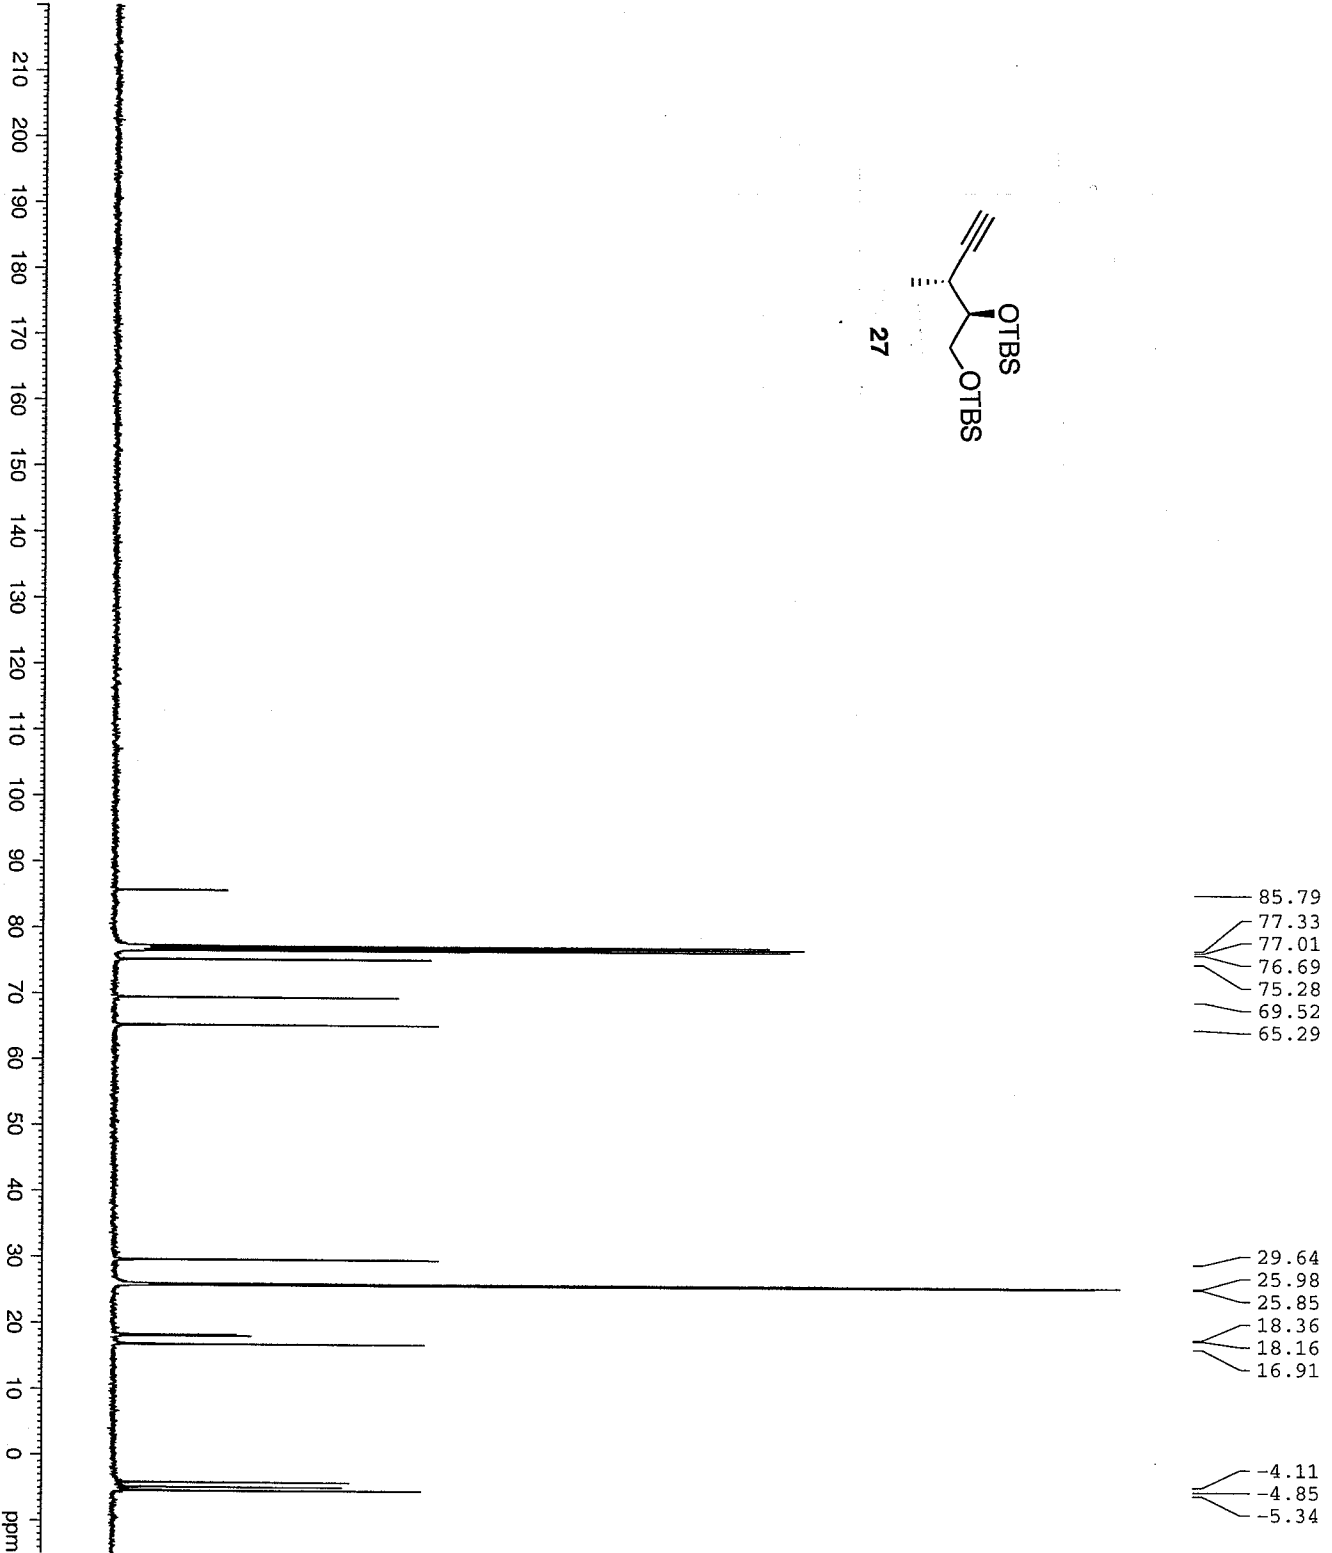

85.79  
77.33  
77.01  
76.69  
75.28  
69.52  
65.29  
  
29.64  
25.98  
25.85  
18.36  
18.16  
16.91  
  
4.11  
4.85  
5.34

Current Data Parameters  
 NAME SUM-1135-d1-T5S Alkyne  
 EXPNO 3  
 PROCNO 1  
 F1 /1  
 USER subham

F2 - Acquisition Parameters  
 Date\_ 20081002  
 Time 21.32  
 INSTRUM DPX400  
 PROBHD BB-1H  
 PULPROG zgpg30  
 TD 65536  
 SOLVENT  
 NS 3627  
 DS  
 SFO 25125.629 Hz  
 FIDRES 0.383387 Hz  
 AQ 1.3042164 sec  
 RG 16384  
 DW 19.900 usec  
 DE 6.00 usec  
 TE 298.2 K  
 D1 0.15000001 sec  
 d11 0.03000000 sec  
 DELTA 0.05000000 sec  
 TDO 1

==== CHANNEL f1 =====  
 NUC1 13C  
 P1 7.80 usec  
 PL1 -3.00 dB  
 SFO1 100.5785700 MHz

==== CHANNEL f2 =====  
 CPDPRG2 waltz16  
 NUC2 1H  
 PCPD2 135.00 usec  
 PL2 17.40 dB  
 PL12 17.40 dB  
 PL13 17.40 dB  
 SFO2 399.9516000 MHz

F2 - Processing parameters  
 SI 32768  
 SF 100.5675080 MHz  
 WDW EM  
 SSB 0  
 LB 3.00 Hz  
 GB 0  
 PC 1.40

Vinyl stannane

7.286

6.288  
6.271  
6.255  
6.239

3.659  
3.649  
3.644  
3.635  
3.625  
3.617  
3.601  
3.591  
3.470  
3.456  
3.446  
3.431  
2.550  
2.533  
2.517  
2.504  
2.487  
1.741  
1.725  
1.541  
1.538  
1.523  
1.517  
1.501  
1.491  
1.482  
1.475  
1.462  
1.389  
1.371  
1.352  
1.334  
1.316  
1.298  
1.024  
1.006  
0.962  
0.935  
0.917  
0.910  
0.908  
0.899  
0.093  
0.083  
0.046

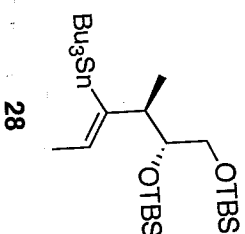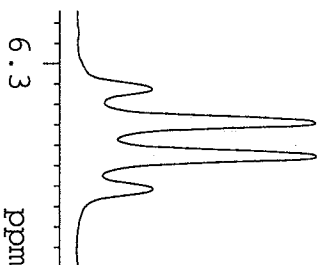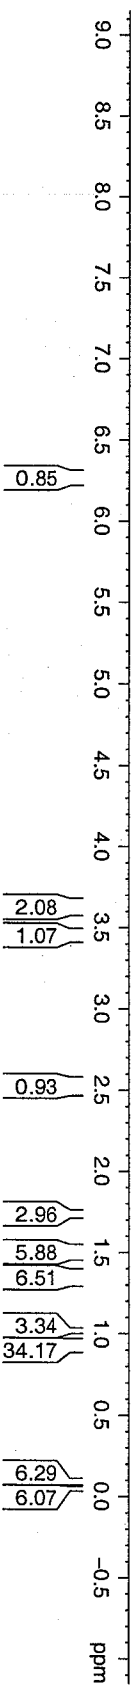

```

Current Data Parameters
NAME      SDM-II-77-VINY1.stu
EXPNO    1
PROCNO   1
F2 - Acquisition Parameters
Date_    20081122
Time     2:02
INSTRUM  DPX-1H
PROBHD   5 mm BBO BB-1H
PULPROG  zg30
TD        32768
SOLVENT  CDCl3
NS        32
DSH       0
SSB       0
AQ        0.195625 sec
RG         203.2
DE        78.000 usec
TE        298.2 K
D1        2.0000000 sec
TD0       1
===== CHANNEL f1 =====
NUC1      1H
P1        14.70 usec
PL1       0.00 dB
SFO1      399.9528000 MHz
F2 - Processing parameters
SI        32768
SF        399.9500000 MHz
WDW       EM
SSB       0
GB        0
PC        1.00
  
```

# Vinyl stannane

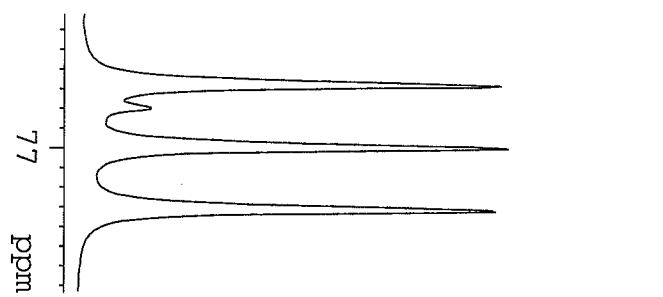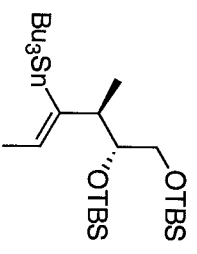

28

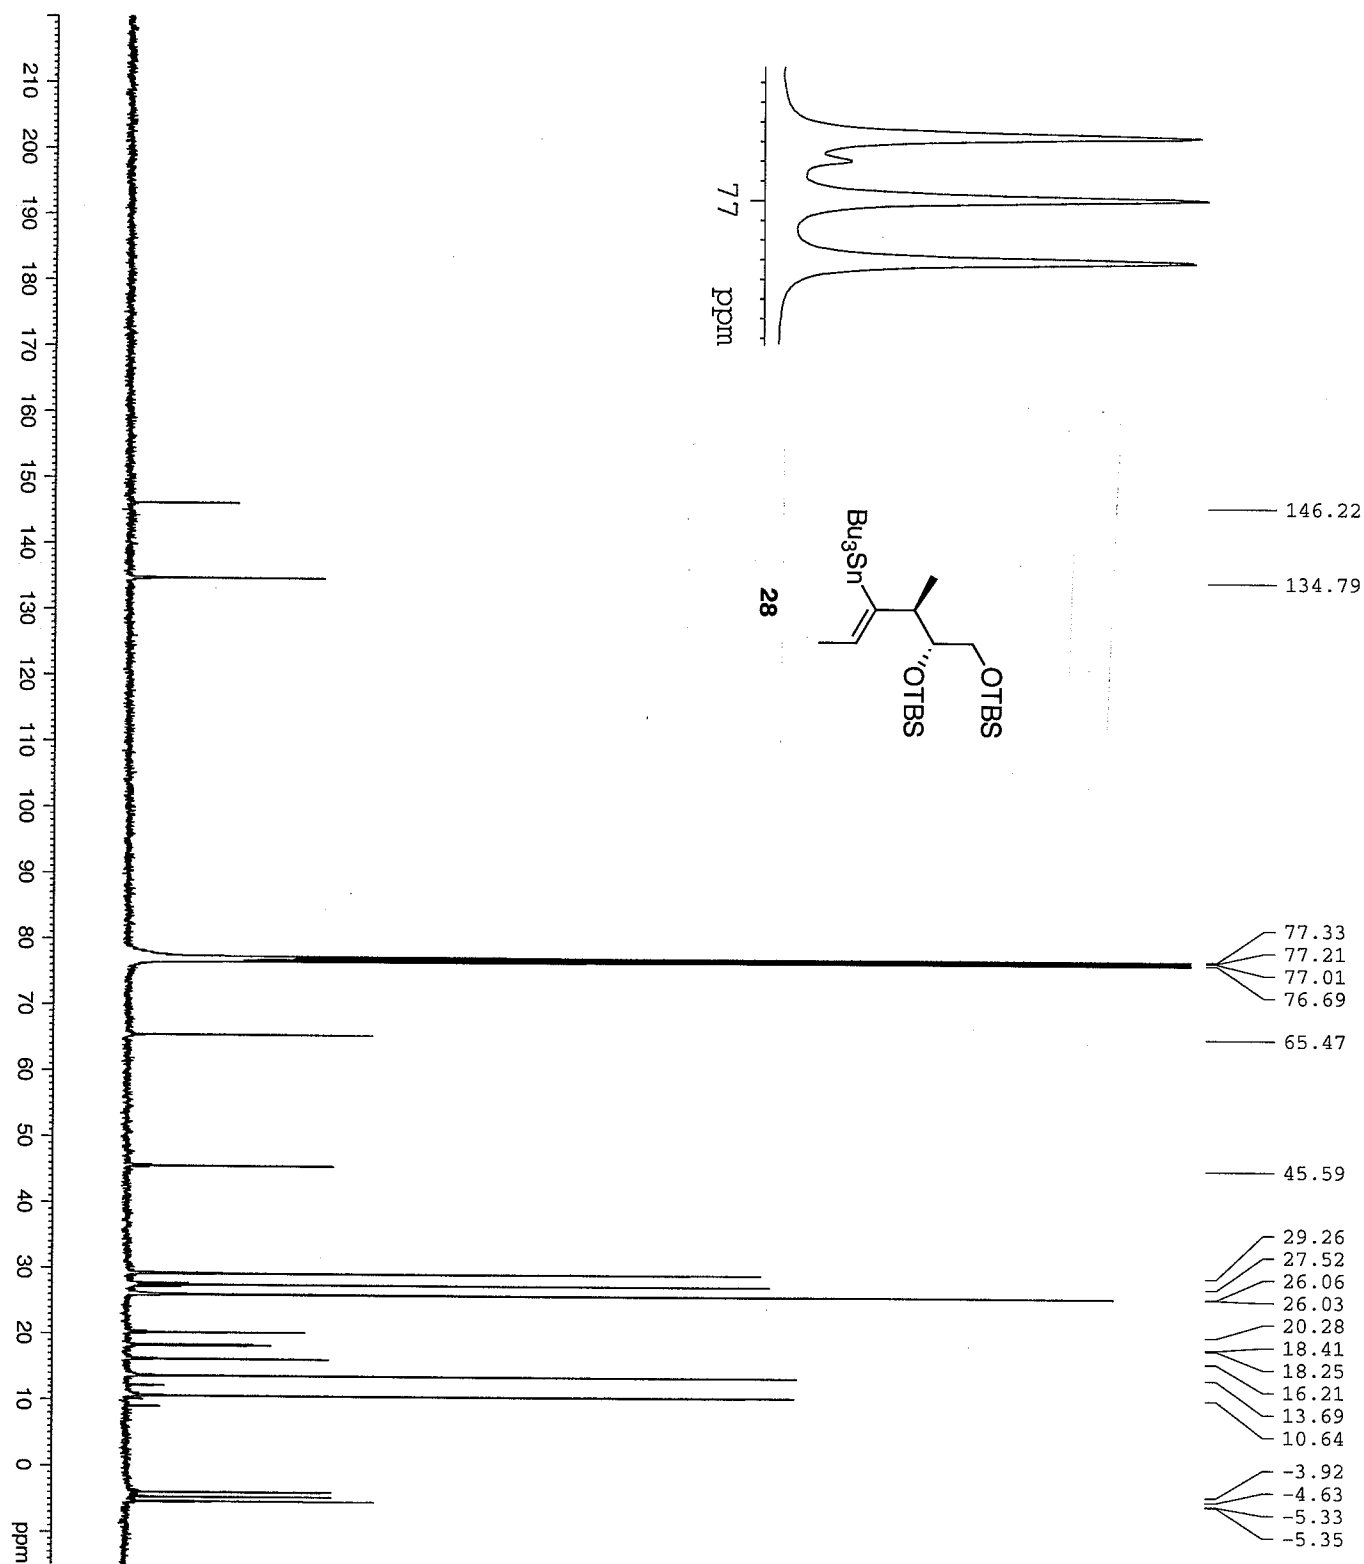

| Chemical Shift (ppm) | Assignment                   |
|----------------------|------------------------------|
| 146.22               | Vinyl C=C                    |
| 134.79               | Vinyl C=C                    |
| 77.33                | Solvent (CDCl <sub>3</sub> ) |
| 77.21                | Solvent (CDCl <sub>3</sub> ) |
| 77.01                | Solvent (CDCl <sub>3</sub> ) |
| 76.69                | Solvent (CDCl <sub>3</sub> ) |
| 65.47                | OTBS                         |
| 45.59                | OTBS                         |
| 29.26                | Aliphatic                    |
| 27.52                | Aliphatic                    |
| 26.06                | Aliphatic                    |
| 26.03                | Aliphatic                    |
| 20.28                | Aliphatic                    |
| 18.41                | Aliphatic                    |
| 18.25                | Aliphatic                    |
| 16.21                | Aliphatic                    |
| 13.69                | Aliphatic                    |
| 10.64                | Aliphatic                    |
| -3.92                | Aliphatic                    |
| -4.63                | Aliphatic                    |
| -5.33                | Aliphatic                    |
| -5.35                | Aliphatic                    |

Current Data Parameters  
 NAME SUB-11-77-Vinyl stannane  
 EXPNO 3  
 PROCNO 1  
 F2 - Acquisition Parameters  
 Date\_ 20081122  
 Time 2.33  
 INSTRUM DPX400  
 PROBHD 5 mm BBO BB-1H  
 PULPROG zgpg30  
 TD 65536  
 SOLVENT CDCL3  
 NS 26420  
 DS 4  
 SWH 25125.629 Hz  
 FIDRES 0.38387 Hz  
 AQ 1.3042164 sec  
 RG 16384  
 DM 19.900 usec  
 DE 4.00 usec  
 TE 298.2 K  
 D1 0.1500001 sec  
 d11 0.0300000 sec  
 DELTA 0.0500000 sec  
 TDO 1  
 ===== CHANNEL f1 =====  
 NUC1 113C  
 P1 7.80 usec  
 PL1 -3.00 dB  
 SFO1 100.5785700 MHz  
 ===== CHANNEL f2 =====  
 CPDPRG2 waltz16  
 P2 135.00 usec  
 PCPD2 117.40 dB  
 PL2 117.40 dB  
 PL13 117.40 dB  
 SFO2 399.9516000 MHz  
 F2 - Processing Parameters  
 SF 100.5675080 MHz  
 WDW EM  
 SSB 0  
 LB 3.00 Hz  
 GB 0  
 PC 1.40

Acetonide

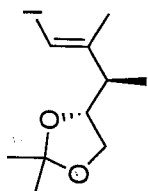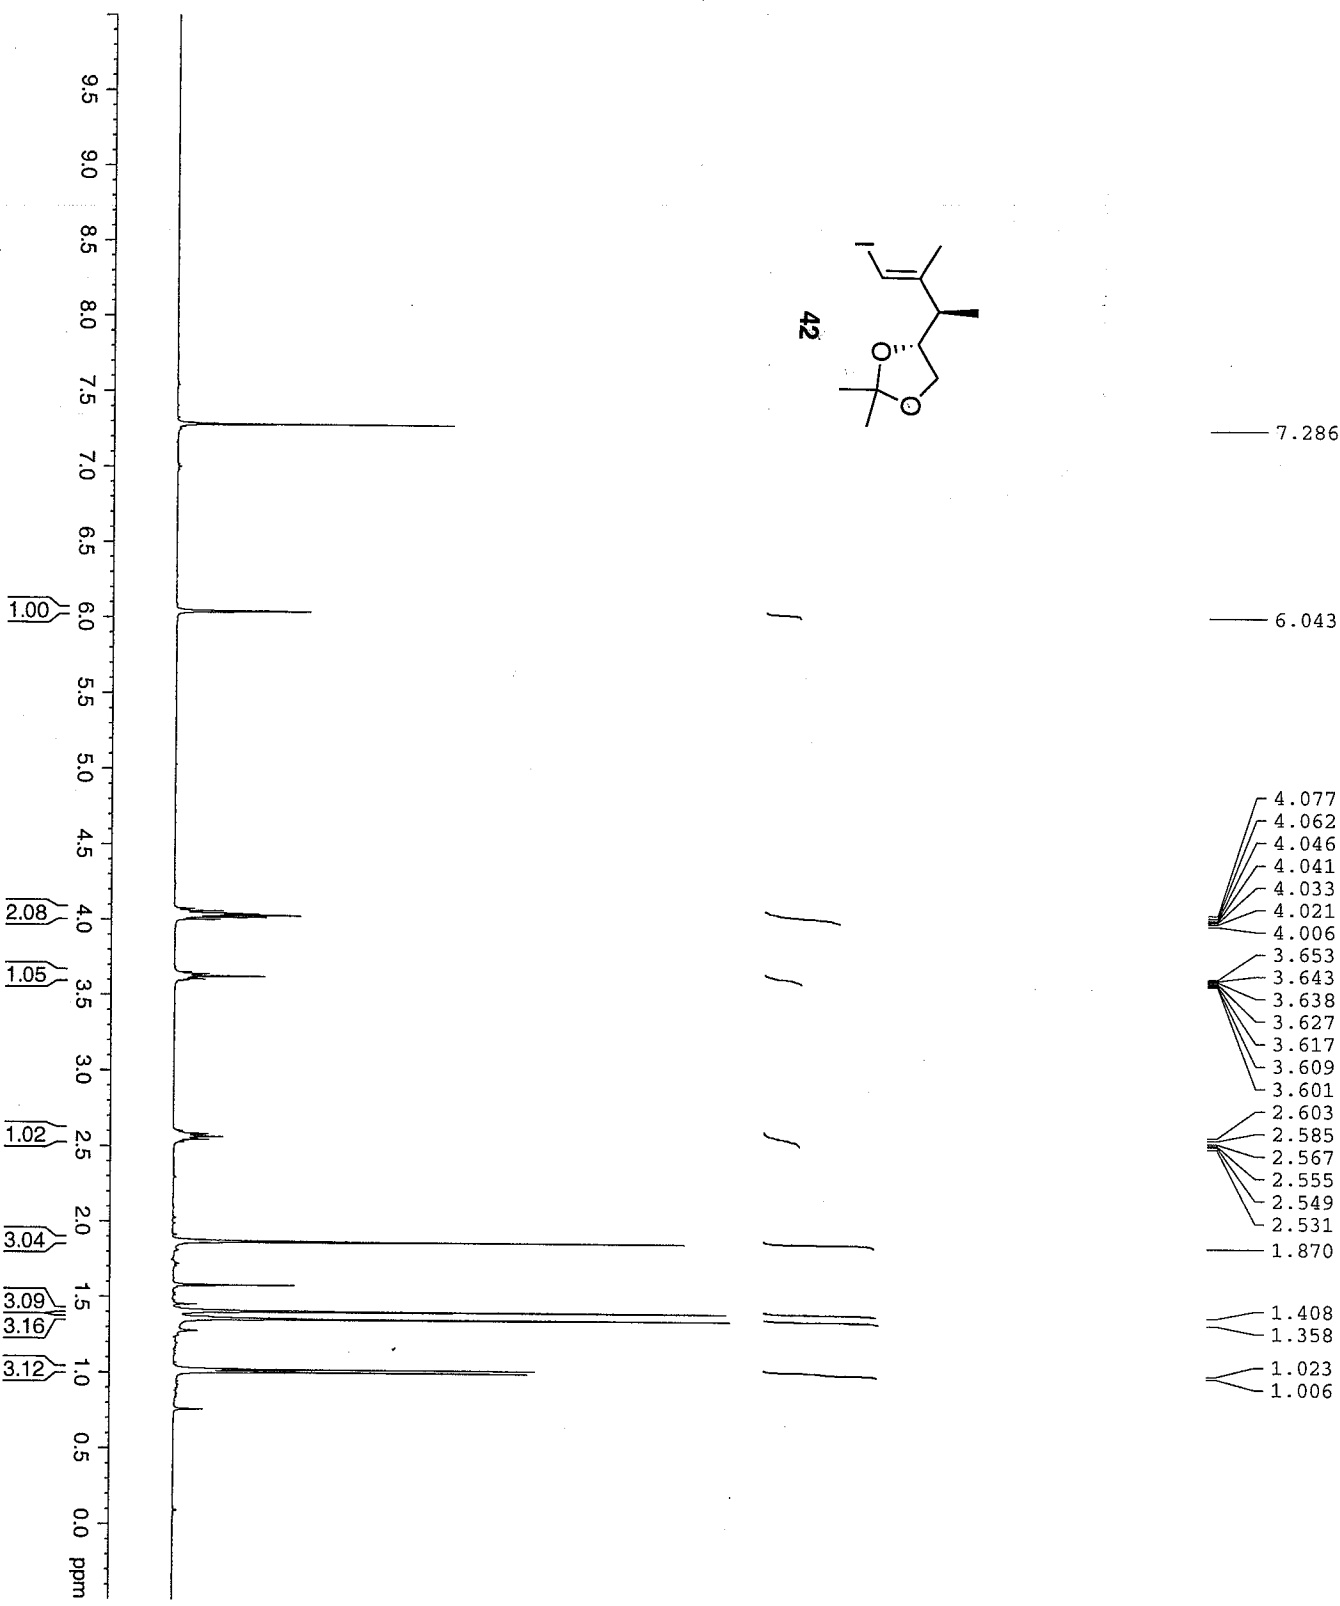

- 7.286
- 6.043
- 4.077
- 4.062
- 4.046
- 4.041
- 4.033
- 4.021
- 4.006
- 3.653
- 3.643
- 3.638
- 3.627
- 3.617
- 3.609
- 3.601
- 2.603
- 2.585
- 2.567
- 2.555
- 2.549
- 2.531
- 1.870
- 1.408
- 1.358
- 1.023
- 1.006

- 1.00
- 2.08
- 1.05
- 1.02
- 3.04
- 3.09
- 3.16
- 3.12

Current Data Parameters  
 NAME SUM-II-78-Acetonide  
 EXPNO 1  
 PROCNO 1  
 DU /h  
 USER subham

F2 - Acquisition Parameters  
 Date\_ 20081124  
 Time 22.21  
 INSTRUM DPK400  
 PROBHD 5 mm BBO BB-1H  
 PULPROG zg30  
 TD 32768  
 SOLVENT CDCl3  
 NS 32  
 DS 2  
 SWH 6410.256 Hz  
 FIDRES 0.195625 Hz  
 AQ 2.559540 sec  
 RG 512  
 DW 78.000 usec  
 DE 6.00 usec  
 TR 298.2 K  
 D1 2.00000000 sec  
 DDO 1

----- CHANNEL f1 -----  
 NUC1 1H  
 P1 14.70 usec  
 PL1 0.00 dB  
 SF01 399.9528000 MHz

F2 - Processing Parameters  
 FI 32768  
 SF 399.9500000 MHz  
 WDW EM  
 SSB 0  
 LB 0  
 GB 0  
 PC 1.00

Acetonide

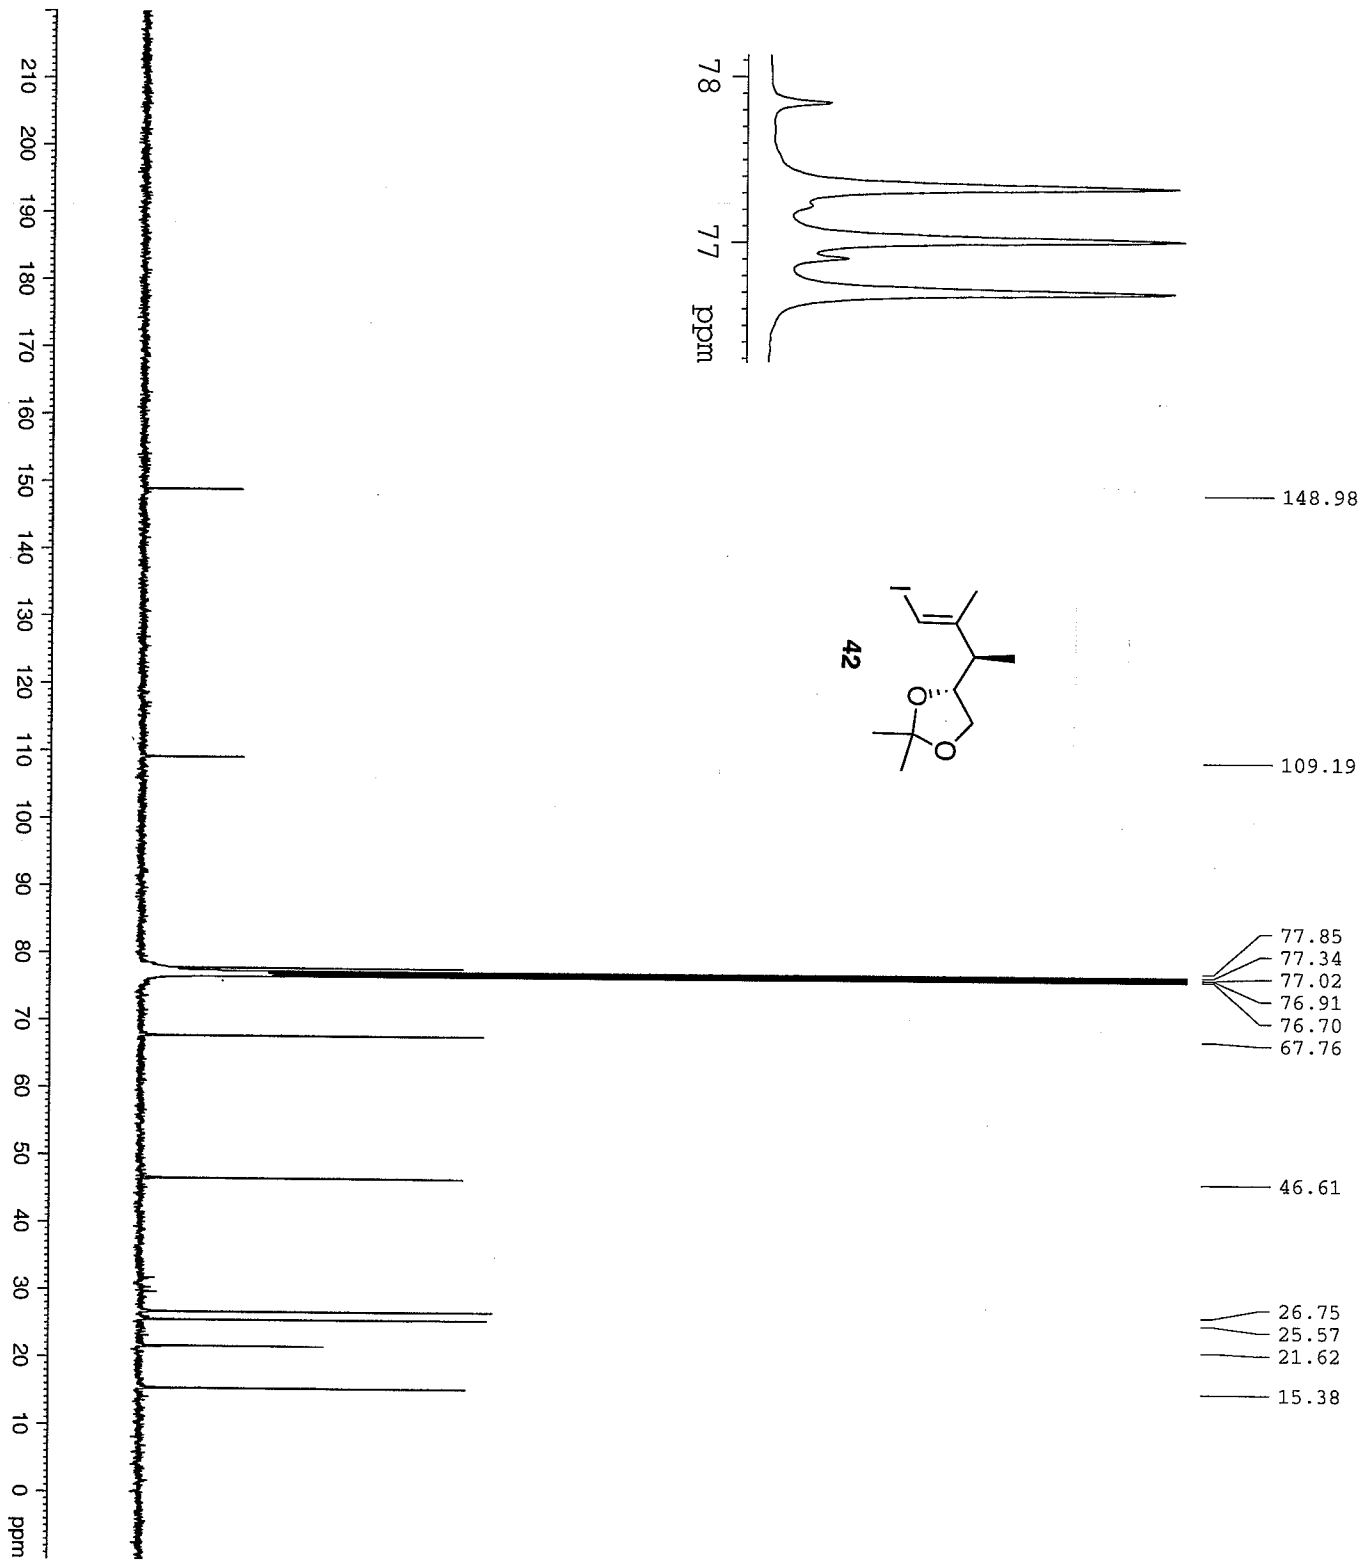

Current Data Parameters  
 NAME SDM-II-78-Acetonide  
 EXPNO 3  
 PROCNO 1  
 DU /n  
 USER subham

F2 - Acquisition Parameters  
 Date\_ 20081124  
 Time 22.38  
 INSTRUM DPK400  
 PROBD 5 mm BBO BB-1H  
 PULPROG zgpg30  
 TD 65536  
 SOLVENT  
 NS 23649  
 DS 4  
 SMH 25125.629 Hz  
 FIDRES 0.383387 Hz  
 AQ 1.3042164 sec  
 RG 16384  
 DW 19.900 usec  
 DE 6.00 usec  
 TE 298.2 K  
 D1 0.1500001 sec  
 d11 0.0300000 sec  
 DELTA 0.0500000 sec  
 TDO 1

==== CHANNEL f1 =====  
 NUC1 13C  
 P1 7.80 usec  
 PL1 -3.00 dB  
 SFO1 100.5785700 MHz

==== CHANNEL f2 =====  
 CPDPRG2 waltz16  
 NUC2 1H  
 RCPD2 135.00 usec  
 PL2 17.40 dB  
 PL12 17.40 dB  
 PL13 17.40 dB  
 SFO2 399.9516000 MHz

F2 - Processing parameters  
 SI 32768  
 SF 100.5675080 MHz  
 WDW EM  
 SSB 0  
 LB 3.00 Hz  
 GB 0  
 PC 1.40



Methyl ketone

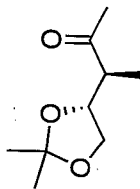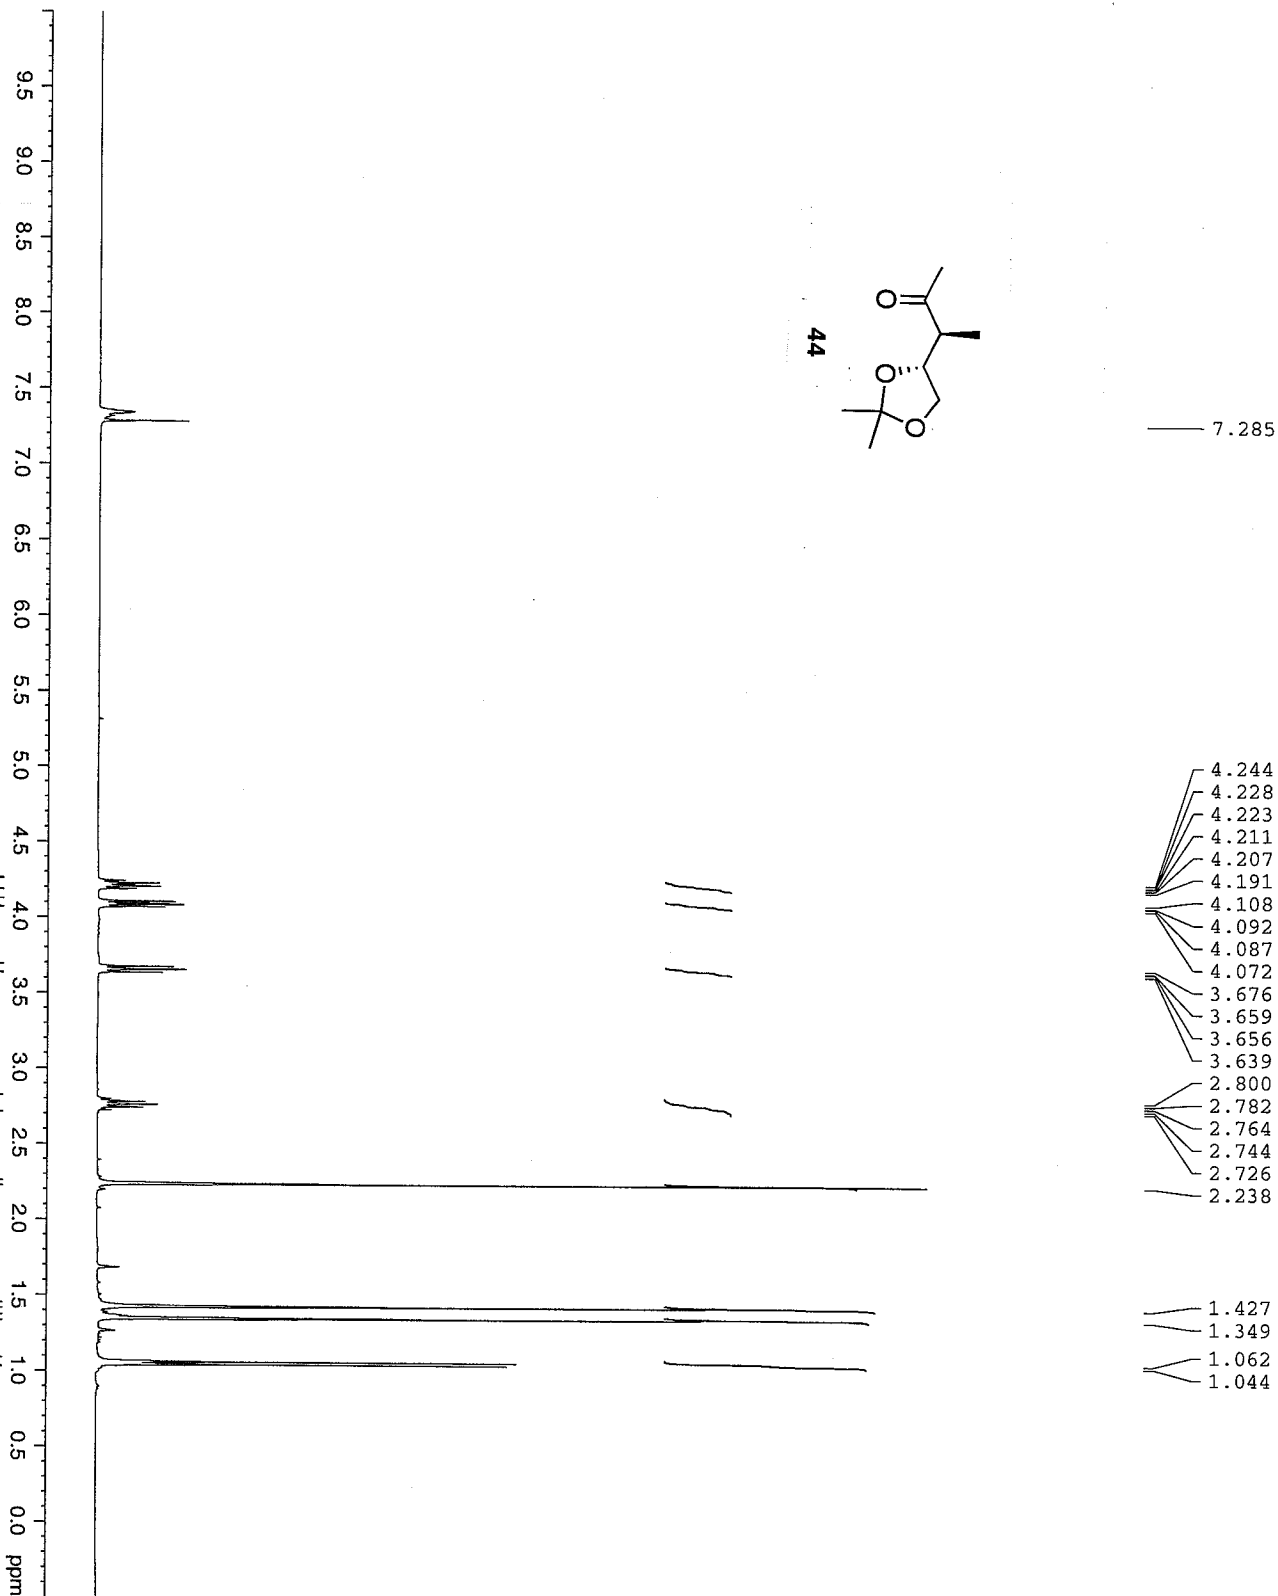

- 7.285
- 4.244
- 4.228
- 4.223
- 4.211
- 4.207
- 4.191
- 4.108
- 4.092
- 4.087
- 4.072
- 3.676
- 3.659
- 3.656
- 3.639
- 2.800
- 2.782
- 2.764
- 2.744
- 2.726
- 2.238
- 1.427
- 1.349
- 1.062
- 1.044

Current Data Parameters  
 EXPNO 2  
 PROCNO 1  
 DU 1  
 USER subnam

F2 - Acquisition Parameters  
 Date\_ 20081207  
 Time 22.59  
 INSTRUM DKA400  
 PULPROG zgpg30  
 FULPROG 32768  
 TD 32768  
 SOLVENT CDCl3  
 NS 32  
 DS 2  
 SWH 6410.256 Hz  
 FIDRES 0.195625 Hz  
 AQ 2.5359540 sec  
 RG 78.000 usec  
 DE 78.000 usec  
 TE 298.2 K  
 D1 2.00000000 sec  
 TDO 1

===== CHANNEL f1 =====  
 NUC1 1H  
 P1 14.70 usec  
 PL 0.00 dB  
 SFO1 399.9628000 MHz

F2 - Processing parameters  
 SI 32768  
 SF 399.9500000 MHz  
 WDW EM  
 SSB 0  
 LB 0.70 Hz  
 GB 0  
 PC 1.00

Methyl ketone

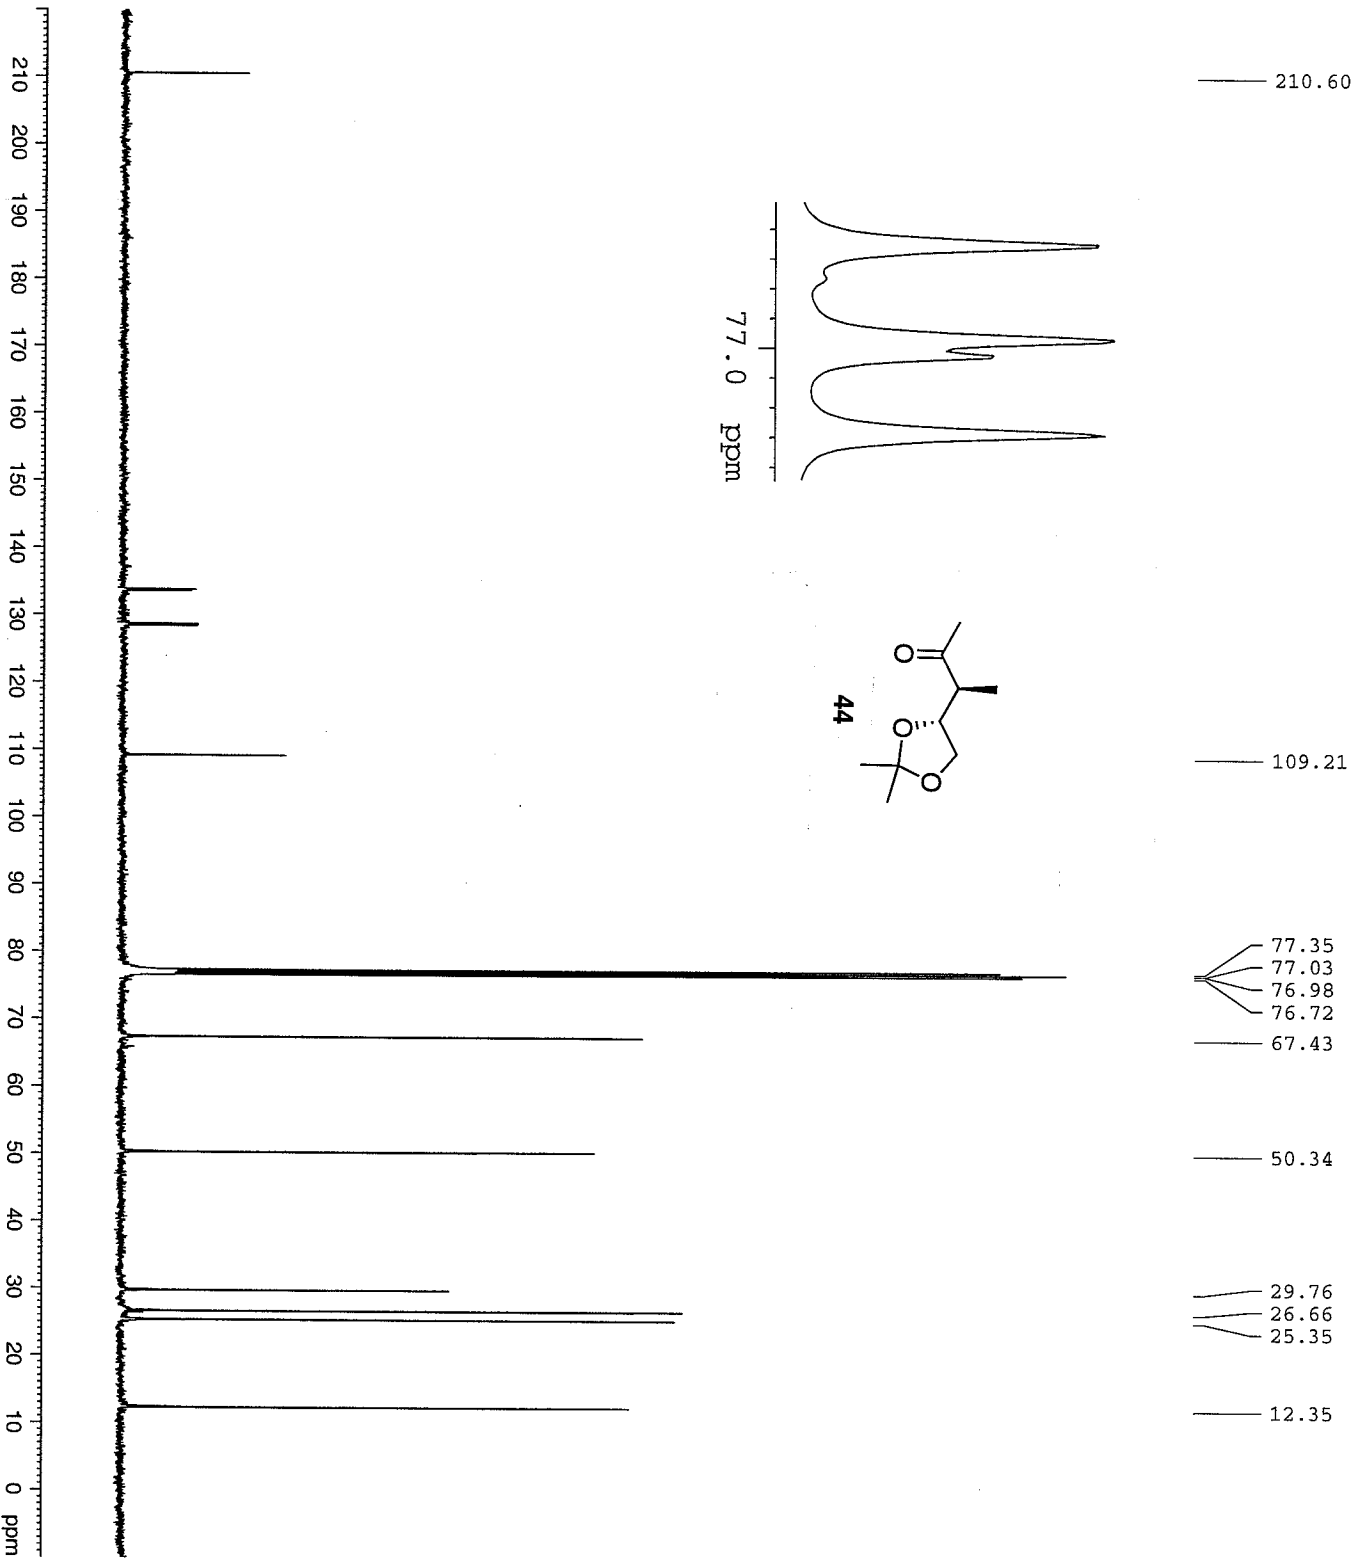

Current Data Parameters  
 Name SUN-IT-87-methyl ketone  
 EXPRNO 3  
 PROCNO 1  
 DU /n  
 USER subham

F2 - Acquisition Parameters  
 Date\_ 20081207  
 Time 23:19  
 INSTRUM DPK400  
 PULPROG zgpg30  
 FULPRGMS zgpg30  
 TD 65536  
 SOLVENT  
 NS 4854  
 DS 4  
 SWH 25125.629 Hz  
 FIDRES 0.383387 Hz  
 AQ 1.3042164 sec  
 RG 16384  
 DE 13.6700 usec  
 TE 296.2 K  
 D1 0.15000001 sec  
 d11 0.03000000 sec  
 DELTA 0.05000000 sec  
 TDO 1

\*\*\*\*\* CHANNEL F1 \*\*\*\*\*  
 NUC1 13C  
 P1 7.00 usec  
 PL1 -3.00 dB  
 SFO1 100.5785700 MHz  
 \*\*\*\*\* CHANNEL F2 \*\*\*\*\*  
 CPDPRG2 waltz16  
 NUC2 1H  
 RCFPD2 135.00 usec  
 PL2 17.40 dB  
 PL3 17.40 dB  
 SFO2 399.9516000 MHz

F2 - Processing parameters  
 SI 32768  
 SF 100.5675080 MHz  
 WDM EM  
 SSB 0  
 LB 3.00 Hz  
 PC 1.40

TBS Enol Ether

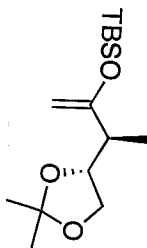

45

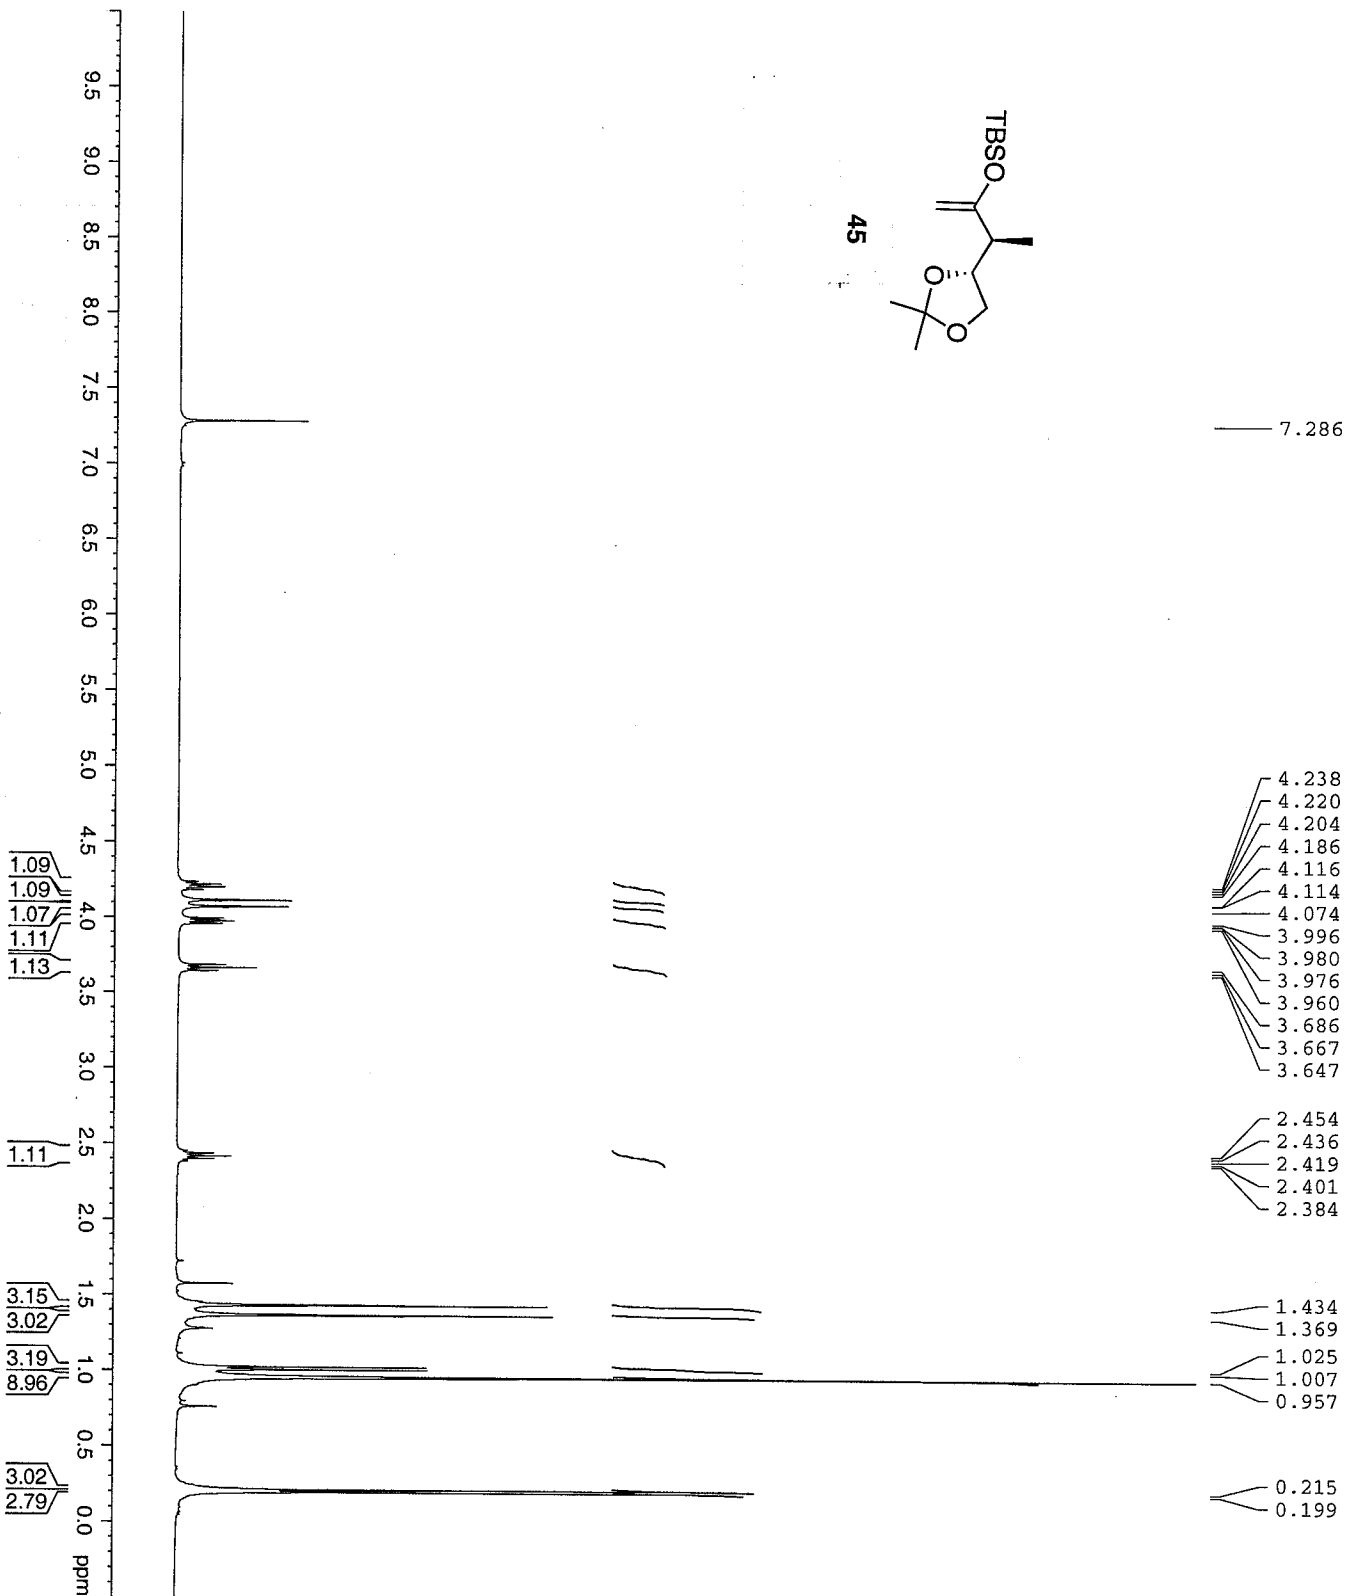

```

Current Data Parameters
NAME          subham
EXPNO         1
PROCNO       1
DU            /h
USER

F2 - Acquisition Parameters
Date_         200203
Time         22:03
INSTRUM      DPX400
PROBHD       5 mm BBO BB-1H
PULPROG      zg30
TD            32768
SOLVENT      CDCl3
NS            32
DS            2
SWH           6410.236 Hz
FIDRES       0.195625 Hz
AQ            2.5559540 sec
RG            78.512
DM            78.000 usec
DE            9.00 usec
TE            298.2 K
D1            2.0000000 sec
TD0           1

===== CHANNEL f1 =====
NUC1          1H
P1            14.70 usec
PL1           0.00 dB
SFO1         399.9528000 MHz

F2 - Processing parameters
SI            32768
SF           399.9500000 MHz
WDW           EM
SSB           0
GB            0
PC            1.00
  
```

TBS Enol Ether

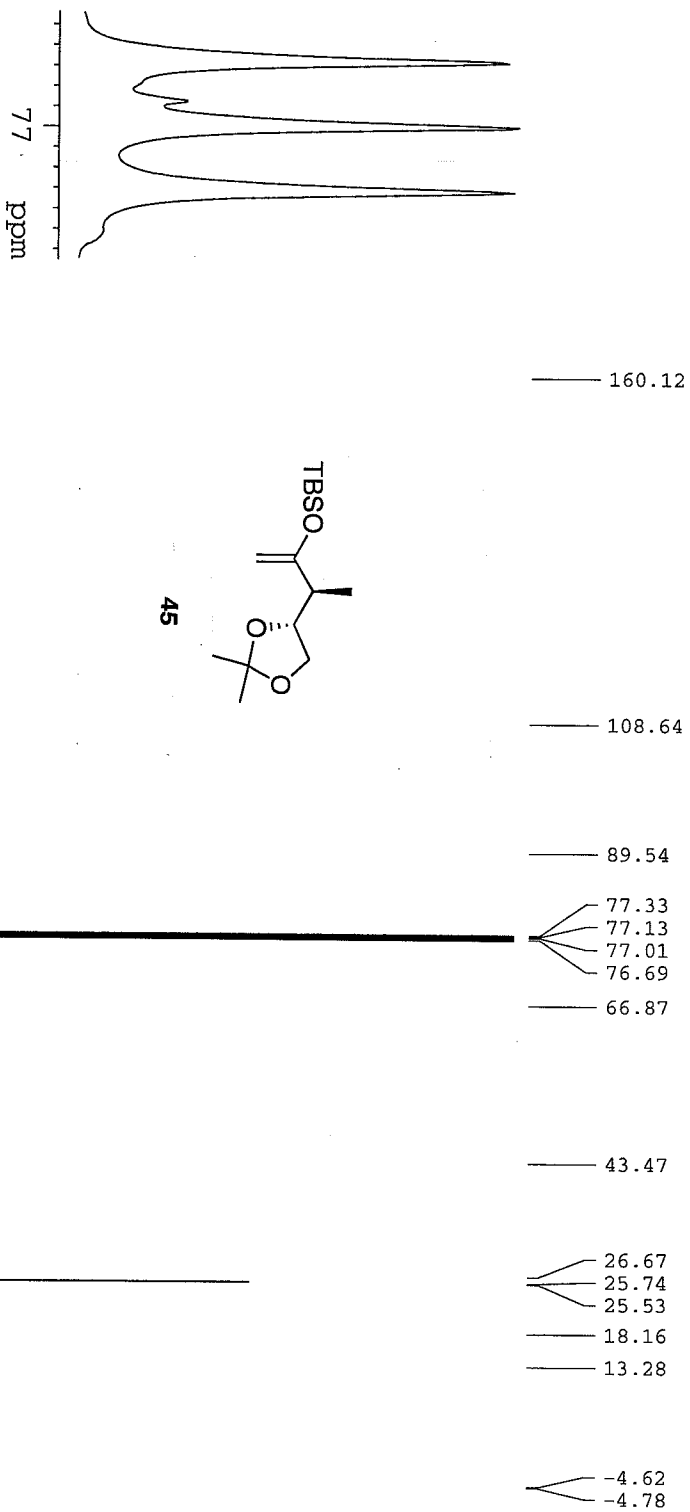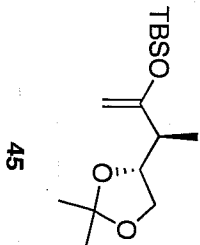

210 200 190 180 170 160 150 140 130 120 110 100 90 80 70 60 50 40 30 20 10 0 ppm

Current Data Parameters  
 NAME: SVM-11-96-TBS enol ether  
 PROCNO: 1  
 EPOCH: 1  
 DU: /n  
 USER: subham

F2 - Acquisition Parameters  
 Date\_: 20090123  
 Time: 22:20  
 INSTRUM: DSI  
 PROBD: 5 mm BBO BB-1H  
 PULPROG: zgpg30  
 TD: 65536  
 SOLVENT: NS  
 NS: 38709  
 DS: 4  
 SWH: 25125.639 Hz  
 FIDRES: 0.34389 Hz  
 AQ: 1.3042164 sec  
 RG: 16384  
 DW: 19.900 usec  
 DE: 6.00 usec  
 TE: 298.2 K  
 d11: 0.1500001 sec  
 d12: 0.0300000 sec  
 DELTA: 0.0500000 sec  
 TDO: 1

==== CHANNEL f1 =====  
 NUC1: 13C  
 P1: 7.80 usec  
 PL1: 3.00 dB  
 SFO1: 100.5785700 MHz

==== CHANNEL f2 =====  
 CPDPRG2: waltz16  
 NUC2: 1H  
 RCFD2: 135.00 usec  
 PL2: 17.40 dB  
 PL12: 17.40 dB  
 PL13: 17.40 dB  
 SFO2: 399.9516000 MHz

F2 - Processing parameters  
 SI: 32768  
 SF: 100.5675080 MHz  
 WDM: EM  
 SFO: 3.00 Hz  
 GB: 0  
 PC: 1.40

Acetonide Alcohol

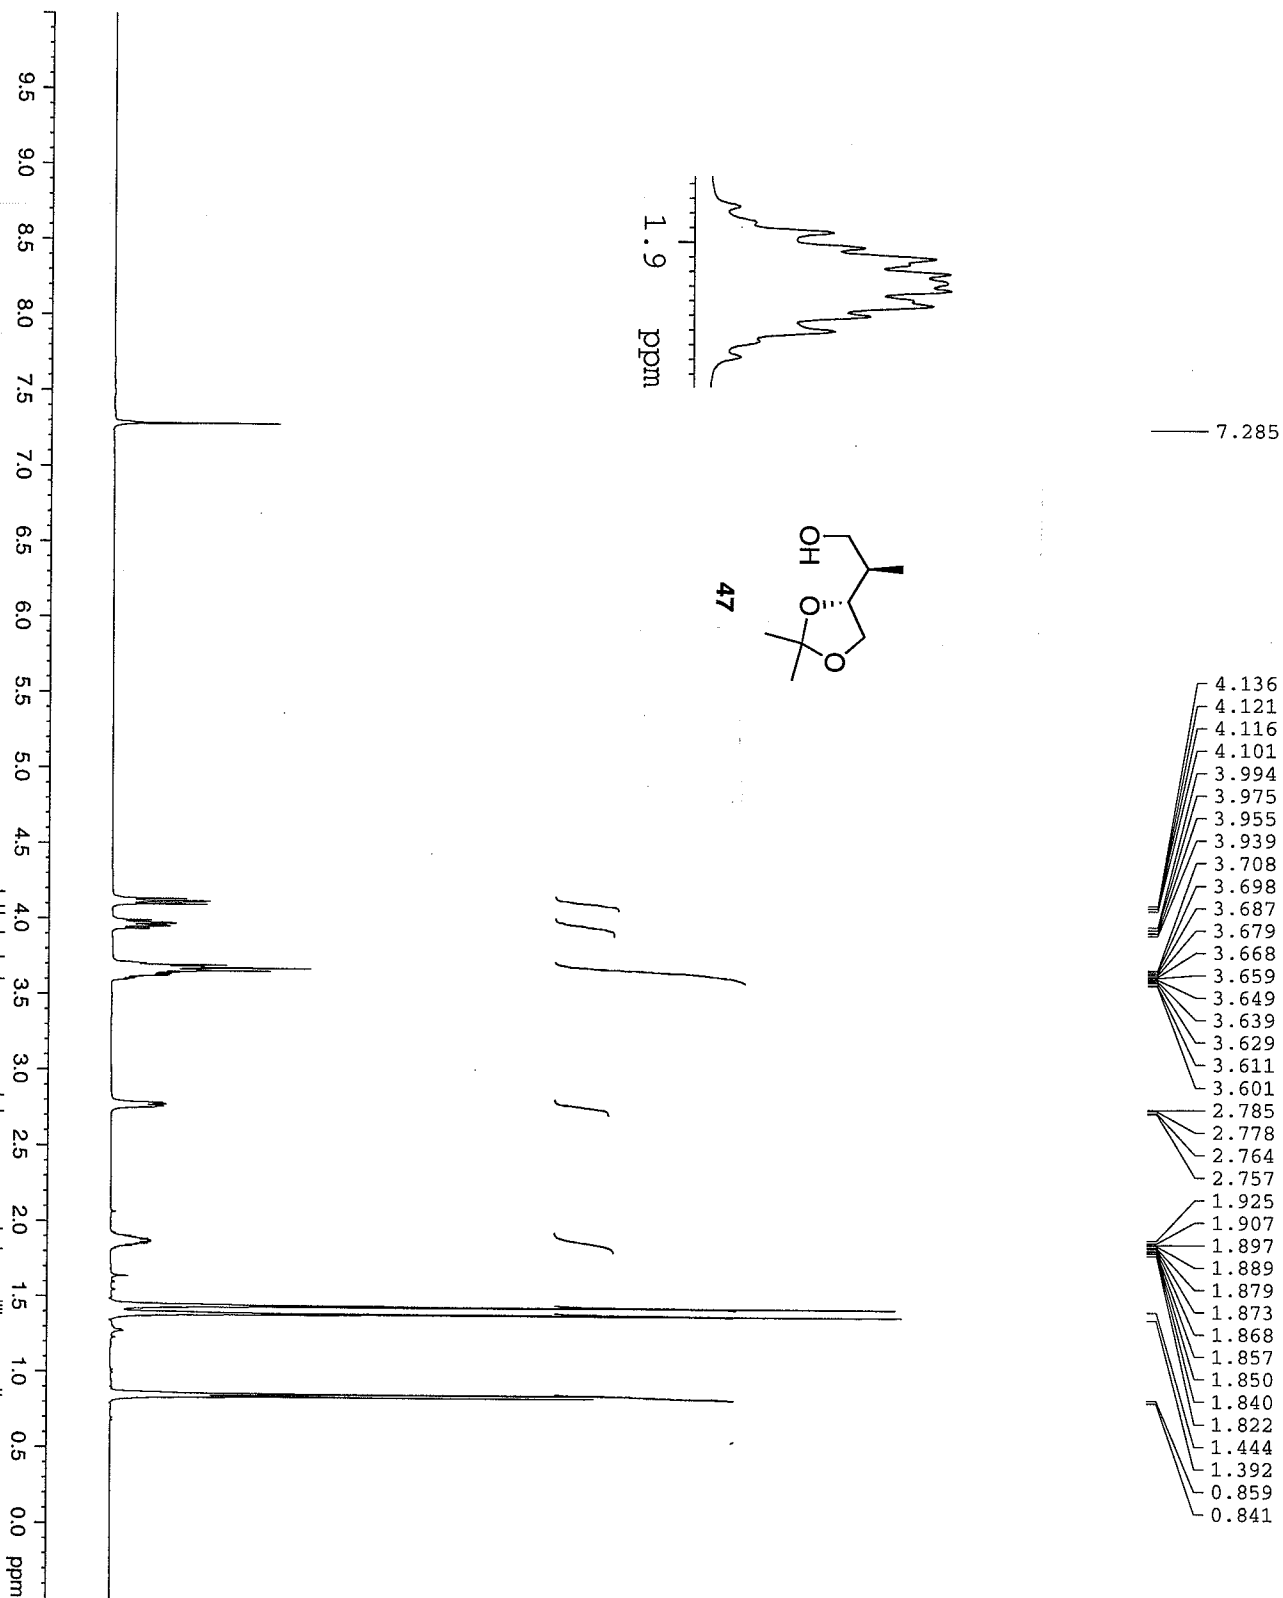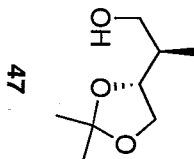

- 4.136
- 4.121
- 4.116
- 4.101
- 3.994
- 3.975
- 3.955
- 3.939
- 3.708
- 3.698
- 3.687
- 3.679
- 3.668
- 3.659
- 3.649
- 3.639
- 3.629
- 3.611
- 3.601
- 2.785
- 2.778
- 2.764
- 2.757
- 1.925
- 1.907
- 1.897
- 1.889
- 1.879
- 1.873
- 1.868
- 1.857
- 1.850
- 1.840
- 1.822
- 1.444
- 1.392
- 0.859
- 0.841

- 1.10
- 1.02
- 3.26
- 0.92
- 1.02
- 3.11
- 3.06
- 3.08

Current Data Parameters  
 NAME S0M-T11-14  
 EXPRNO 3  
 PROCNO 1  
 DU /h  
 USER subham

F2 - Acquisition Parameters  
 Date\_ 20090210  
 Time 11.27  
 INSTRUM DPK400  
 PROBHD 5 mm BBI 1H-BB  
 PULPROG zg30  
 TD 32768  
 SOLVENT CDCl3  
 NS 32  
 DS 2  
 SWH 6410.256 Hz  
 FIDRES 0.195625 Hz  
 AQ 2.5559540 sec  
 RG 71.8  
 DW 78.000 usec  
 DE 6.00 usec  
 TE 298.2 K  
 D1 2.00000000 sec  
 TDO 1

==== CHANNEL f1 =====  
 WDW1 1H  
 PL 14.70 usec  
 PL1 0.00 dB  
 SFO1 399.9528000 MHz

F2 - Processing parameters  
 SI 399.9500000 MHz  
 SF 399.9500000 MHz  
 WDW DK  
 SSB 0  
 LB 0.70 Hz  
 GB 0  
 PC 1.00

# Acetonide Alcohol

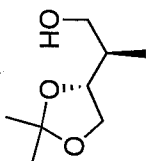

47

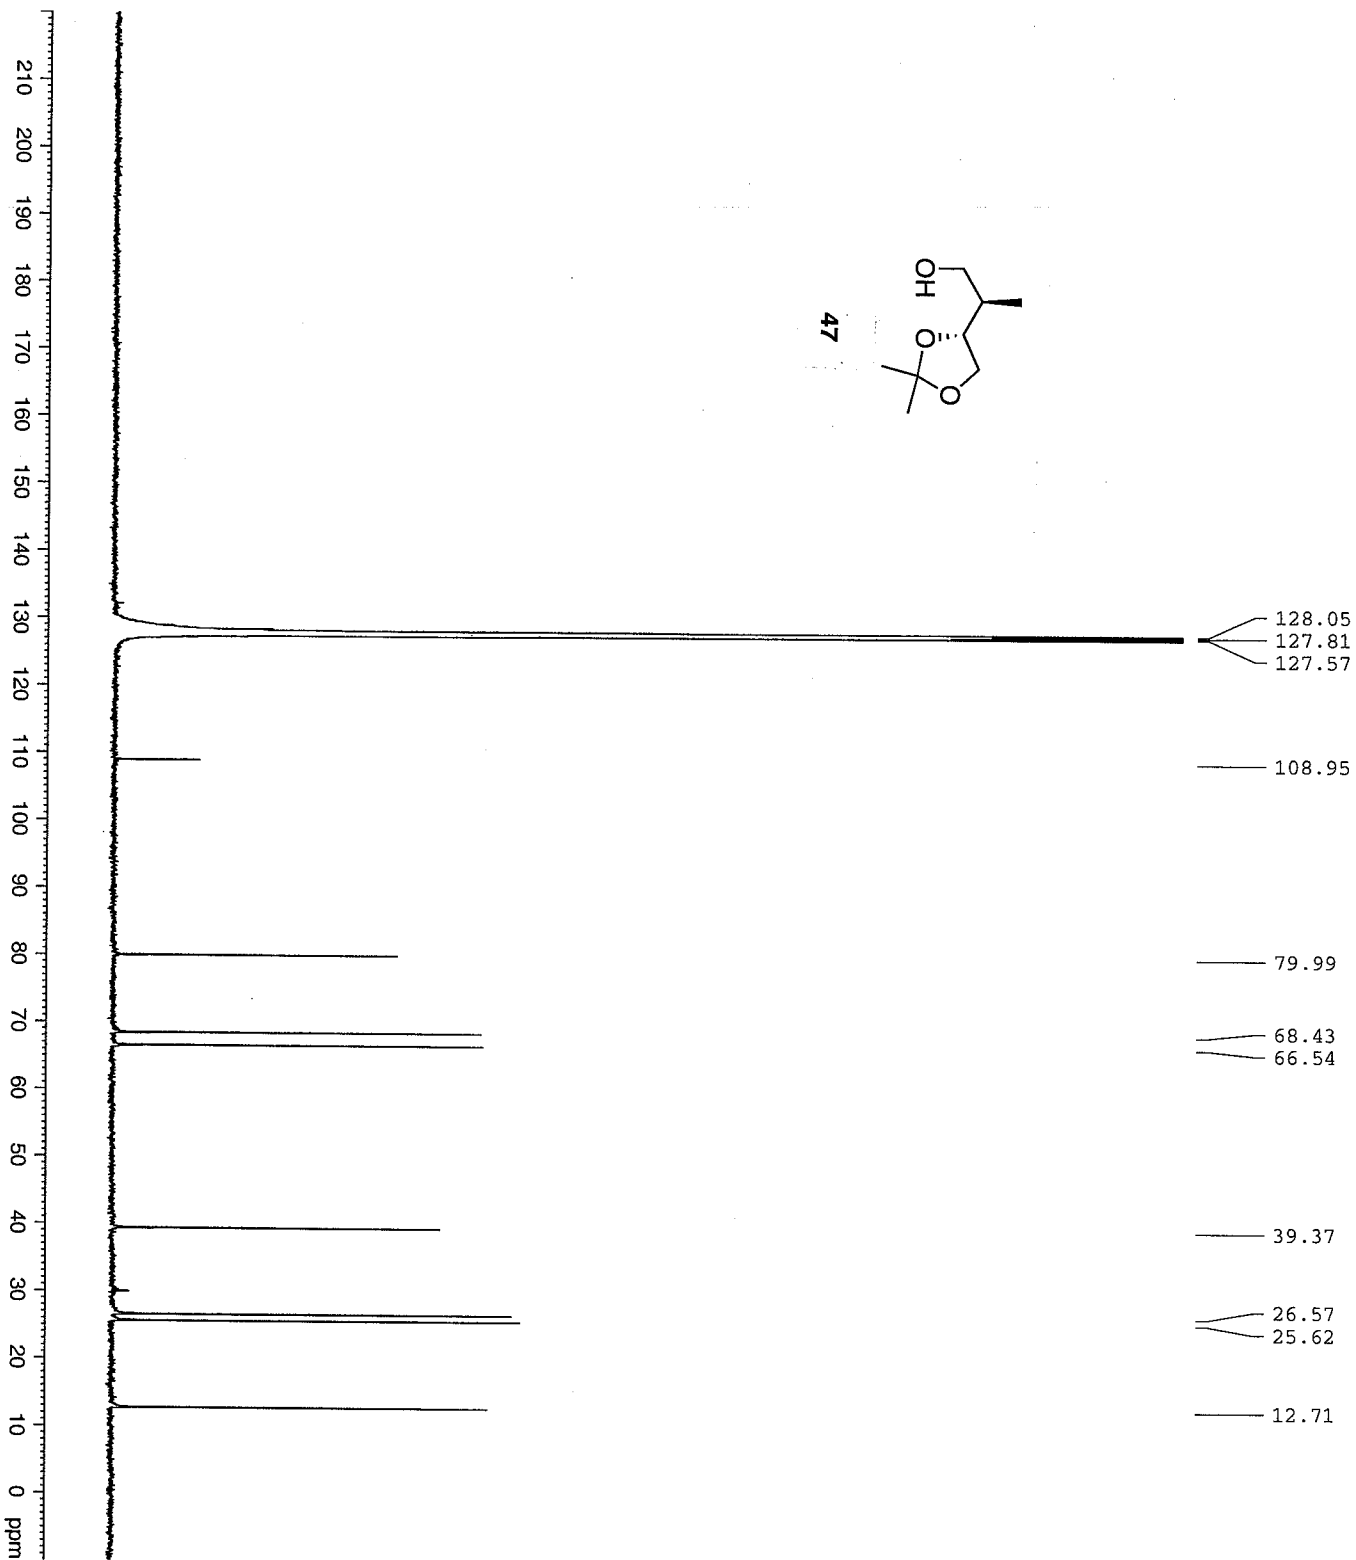

128.05  
127.81  
127.57

108.95

79.99

68.43  
66.54

39.37

26.57  
25.62

12.71

```

Current Data Parameters
NAME          5M-11-14-Acetonide Alcohol
EXNO          3
PROCNO        1
DU            1/n
USER          subham

F2 - Acquisition Parameters
Date_         20090212
Time          1:02
INSTRUM       DP402
PROBHD        5 mm BBO BB-1H
PULPROG       zgpg30
TD            65536
SFO1          100.626130 MHz
AQ            21.585
RG            1.000
SMH           25125.629 Hz
FIDRES        0.328192 Hz
RG            1.03213
AQ            1.03213
RG            19.900 usec
DE            6.000 usec
DI            2.000 usec
D11           0.15000001 sec
DELTA         0.03000000 sec
TD0           1

===== CHANNEL f1 =====
NUC1          13C
P1            7.80 usec
PL1           -1.40 dB
SFO1          100.5785700 MHz

===== CHANNEL f2 =====
NAMEPRG2     waltz16
NUC2          135.00 usec
PCPD2        17.40 dB
PL2          17.40 dB
PL12         17.40 dB
SFO2         399.9516000 MHz

F2 - Processing parameters
SI           100.5675080 MHz
WDW          RM
SSB          0
GB           3.00 Hz
AB           0.00
PC           1.40
  
```
